# Supplementary material for: Peer review of the pesticide risk assessment of the active substance fludioxonil
Source: PubMed Central journal article supplement (PMC11532725; doi:10.2903/j.efsa.2024.9047), 2024-11-04
Supplement: EFS2-22-e9047-s001.pdf [file EFS2-22-e9047-s001.pdf]

Annex to: Conclusion on the peer review of the pesticide risk assessment of the active substance fludioxonil. doi:10.2903/j.efsa.2024.9047

© 2024 Wiley-VCH Verlag GmbH & Co. KgaA on behalf of the European Food Safety Authority.

## Appendix B – List of end points for the active substance and the representative formulation

### Identity, Physical and Chemical Properties, Details of Uses, Further Information (Regulation (EU) N° 283/2013, Annex Part A, points 1.3 and 3.2)

|                                    |             |
|------------------------------------|-------------|
| Active substance (ISO Common Name) | Fludioxonil |
| Function ( <i>e.g.</i> fungicide)  | Fungicide   |
| Rapporteur Member State            | FR (France) |
| Co-rapporteur Member State         | ES (Spain)  |

### Identity (Regulation (EU) N° 283/2013, Annex Part A, point 1)

|                                                                                                                                           |                                                                                                                                                                                                              |
|-------------------------------------------------------------------------------------------------------------------------------------------|--------------------------------------------------------------------------------------------------------------------------------------------------------------------------------------------------------------|
| Chemical name (IUPAC)                                                                                                                     | 4-(2,2-difluoro-1,3-benzodioxol-4-yl)-1 <i>H</i> -pyrrole-3-carbonitrile                                                                                                                                     |
| Chemical name (CA)                                                                                                                        | 4-(2,2-difluoro-1,3-benzodioxol-4-yl)-1 <i>H</i> -pyrrole-3-carbonitrile                                                                                                                                     |
| Producer's development code number                                                                                                        | CGA173506                                                                                                                                                                                                    |
| CIPAC No                                                                                                                                  | 522                                                                                                                                                                                                          |
| CAS No                                                                                                                                    | 131341-86-1                                                                                                                                                                                                  |
| EC No (EINECS or ELINCS)                                                                                                                  | Not available                                                                                                                                                                                                |
| FAO Specification (including year of publication)                                                                                         | None                                                                                                                                                                                                         |
| Minimum purity of the active substance as manufactured                                                                                    | 950 g/kg                                                                                                                                                                                                     |
| Identity of relevant impurities (of toxicological, ecotoxicological and/or environmental concern) in the active substance as manufactured | 1-[2-cyano-1-(2,2-difluoro-2 <i>H</i> -1,3-benzodioxol-4-yl)ethyl]-4-(2,2-difluoro-2 <i>H</i> -1,3-benzodioxol-4-yl)-1 <i>H</i> -pyrrole-3-carbonitrile (SYN549129) max 3 g/kg<br>Open for other impurities. |
| Location of the (proposed) reference specification (for significant impurities)                                                           | RAR Volume 4 (2023-12)                                                                                                                                                                                       |
| Molecular formula                                                                                                                         | C <sub>12</sub> H <sub>6</sub> F <sub>2</sub> N <sub>2</sub> O <sub>2</sub>                                                                                                                                  |
| Molar mass                                                                                                                                | 248.2 g/mol                                                                                                                                                                                                  |

Structural formula

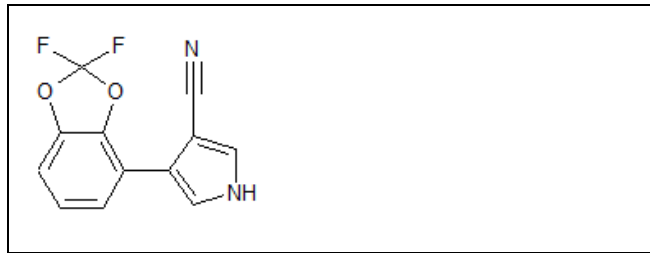

**Physical and chemical properties (Regulation (EU) N° 283/2013, Annex Part A, point 2)**

| Melting point (state purity)                                        | 199.8 °C (99.8%)                                                                                                                                                                                                                                                                                                                                                                                                                                                                                                                                                                                                                                                                                                                                                                                                                                                                                                                                                                                       |                                                                 |                                     |                                                                 |         |               |        |        |         |          |        |         |        |         |         |
|---------------------------------------------------------------------|--------------------------------------------------------------------------------------------------------------------------------------------------------------------------------------------------------------------------------------------------------------------------------------------------------------------------------------------------------------------------------------------------------------------------------------------------------------------------------------------------------------------------------------------------------------------------------------------------------------------------------------------------------------------------------------------------------------------------------------------------------------------------------------------------------------------------------------------------------------------------------------------------------------------------------------------------------------------------------------------------------|-----------------------------------------------------------------|-------------------------------------|-----------------------------------------------------------------|---------|---------------|--------|--------|---------|----------|--------|---------|--------|---------|---------|
| Boiling point (state purity)                                        | Decomposition occurs before boiling point (99.8%)                                                                                                                                                                                                                                                                                                                                                                                                                                                                                                                                                                                                                                                                                                                                                                                                                                                                                                                                                      |                                                                 |                                     |                                                                 |         |               |        |        |         |          |        |         |        |         |         |
| Temperature of decomposition (state purity)                         | 306 °C (99.8%)                                                                                                                                                                                                                                                                                                                                                                                                                                                                                                                                                                                                                                                                                                                                                                                                                                                                                                                                                                                         |                                                                 |                                     |                                                                 |         |               |        |        |         |          |        |         |        |         |         |
| Appearance (state purity)                                           | Faintly yellow odourless powder (99.9% pure)<br>Light olive green odourless powder (96.8% technical)                                                                                                                                                                                                                                                                                                                                                                                                                                                                                                                                                                                                                                                                                                                                                                                                                                                                                                   |                                                                 |                                     |                                                                 |         |               |        |        |         |          |        |         |        |         |         |
| Vapour pressure (state temperature, state purity)                   | $3.9 \times 10^{-9}$ hPa at 25 °C (99.8%)                                                                                                                                                                                                                                                                                                                                                                                                                                                                                                                                                                                                                                                                                                                                                                                                                                                                                                                                                              |                                                                 |                                     |                                                                 |         |               |        |        |         |          |        |         |        |         |         |
| Henry's law constant (state temperature)                            | $5.4 \times 10^{-5}$ Pa.m <sup>3</sup> .mol <sup>-1</sup> at 25 °C                                                                                                                                                                                                                                                                                                                                                                                                                                                                                                                                                                                                                                                                                                                                                                                                                                                                                                                                     |                                                                 |                                     |                                                                 |         |               |        |        |         |          |        |         |        |         |         |
| Solubility in water (state temperature, state purity and pH)        | 1.8 mg/L at 25 °C (99.8%)<br>The solubility has not been carried out at different pH as the molecule does not dissociate within the range pH 2 to pH 12.                                                                                                                                                                                                                                                                                                                                                                                                                                                                                                                                                                                                                                                                                                                                                                                                                                               |                                                                 |                                     |                                                                 |         |               |        |        |         |          |        |         |        |         |         |
| Solubility in organic solvents (state temperature, state purity)    | At 25 °C (96.8%)<br><table border="0" style="width: 100%;"> <tr> <td style="padding-left: 20px;">Acetone</td> <td style="text-align: right;">190 g/L</td> </tr> <tr> <td style="padding-left: 20px;">Dichloromethane</td> <td style="text-align: right;">7.3 g/L</td> </tr> <tr> <td style="padding-left: 20px;">Ethyl Acetate</td> <td style="text-align: right;">86 g/L</td> </tr> <tr> <td style="padding-left: 20px;">Hexane</td> <td style="text-align: right;">10 mg/L</td> </tr> <tr> <td style="padding-left: 20px;">Methanol</td> <td style="text-align: right;">42 g/L</td> </tr> <tr> <td style="padding-left: 20px;">Octanol</td> <td style="text-align: right;">20 g/L</td> </tr> <tr> <td style="padding-left: 20px;">Toluene</td> <td style="text-align: right;">2.7 g/L</td> </tr> </table>                                                                                                                                                                                            | Acetone                                                         | 190 g/L                             | Dichloromethane                                                 | 7.3 g/L | Ethyl Acetate | 86 g/L | Hexane | 10 mg/L | Methanol | 42 g/L | Octanol | 20 g/L | Toluene | 2.7 g/L |
| Acetone                                                             | 190 g/L                                                                                                                                                                                                                                                                                                                                                                                                                                                                                                                                                                                                                                                                                                                                                                                                                                                                                                                                                                                                |                                                                 |                                     |                                                                 |         |               |        |        |         |          |        |         |        |         |         |
| Dichloromethane                                                     | 7.3 g/L                                                                                                                                                                                                                                                                                                                                                                                                                                                                                                                                                                                                                                                                                                                                                                                                                                                                                                                                                                                                |                                                                 |                                     |                                                                 |         |               |        |        |         |          |        |         |        |         |         |
| Ethyl Acetate                                                       | 86 g/L                                                                                                                                                                                                                                                                                                                                                                                                                                                                                                                                                                                                                                                                                                                                                                                                                                                                                                                                                                                                 |                                                                 |                                     |                                                                 |         |               |        |        |         |          |        |         |        |         |         |
| Hexane                                                              | 10 mg/L                                                                                                                                                                                                                                                                                                                                                                                                                                                                                                                                                                                                                                                                                                                                                                                                                                                                                                                                                                                                |                                                                 |                                     |                                                                 |         |               |        |        |         |          |        |         |        |         |         |
| Methanol                                                            | 42 g/L                                                                                                                                                                                                                                                                                                                                                                                                                                                                                                                                                                                                                                                                                                                                                                                                                                                                                                                                                                                                 |                                                                 |                                     |                                                                 |         |               |        |        |         |          |        |         |        |         |         |
| Octanol                                                             | 20 g/L                                                                                                                                                                                                                                                                                                                                                                                                                                                                                                                                                                                                                                                                                                                                                                                                                                                                                                                                                                                                 |                                                                 |                                     |                                                                 |         |               |        |        |         |          |        |         |        |         |         |
| Toluene                                                             | 2.7 g/L                                                                                                                                                                                                                                                                                                                                                                                                                                                                                                                                                                                                                                                                                                                                                                                                                                                                                                                                                                                                |                                                                 |                                     |                                                                 |         |               |        |        |         |          |        |         |        |         |         |
| Surface tension (state concentration and temperature, state purity) | 71.2 mN/m at 20 °C (90 % saturated solution) (99.8%)<br>47.7 - 48.5 mN/m at 20 °C (100 % saturated solution) (96.8%)                                                                                                                                                                                                                                                                                                                                                                                                                                                                                                                                                                                                                                                                                                                                                                                                                                                                                   |                                                                 |                                     |                                                                 |         |               |        |        |         |          |        |         |        |         |         |
| Partition coefficient (state temperature, pH and purity)            | log P <sub>OW</sub> = 4.12 at 25 °C (99.8%)<br>Effect of pH was not investigated since there is no dissociation in water in the environmentally relevant pH range.                                                                                                                                                                                                                                                                                                                                                                                                                                                                                                                                                                                                                                                                                                                                                                                                                                     |                                                                 |                                     |                                                                 |         |               |        |        |         |          |        |         |        |         |         |
| Dissociation constant (state purity)                                | pK <sub>a1</sub> < 0 (basic) (99.8%)<br>pK <sub>a2</sub> ≈ 14.1 (acidic) (99.8%)                                                                                                                                                                                                                                                                                                                                                                                                                                                                                                                                                                                                                                                                                                                                                                                                                                                                                                                       |                                                                 |                                     |                                                                 |         |               |        |        |         |          |        |         |        |         |         |
| UV/VIS absorption (max.) incl. ε (state purity, pH)                 | At 99.9%,<br><table border="0" style="width: 100%; border-collapse: collapse;"> <thead> <tr> <th style="text-align: left; padding-right: 10px;">Solution</th> <th style="text-align: center; padding-right: 10px;">Wavelength λ<sub>max</sub><br/>(nm)</th> <th style="text-align: right;">Extinction coeff. ε<br/>(L.mol<sup>-1</sup>.cm<sup>-1</sup>)</th> </tr> </thead> <tbody> <tr> <td style="padding-right: 10px;">neutral</td> <td style="text-align: center;">266</td> <td style="text-align: right;">12384</td> </tr> <tr> <td style="padding-right: 10px;">acidic</td> <td style="text-align: center;">265</td> <td style="text-align: right;">12327</td> </tr> <tr> <td style="padding-right: 10px;">basic</td> <td style="text-align: center;">271</td> <td style="text-align: right;">11790</td> </tr> </tbody> </table><br>at λ > 290 nm: 3204 L.mol <sup>-1</sup> .cm <sup>-1</sup><br>Absorption measured up to 750 nm<br>Data gap: spectral data for the relevant impurity SYN549129 | Solution                                                        | Wavelength λ <sub>max</sub><br>(nm) | Extinction coeff. ε<br>(L.mol <sup>-1</sup> .cm <sup>-1</sup> ) | neutral | 266           | 12384  | acidic | 265     | 12327    | basic  | 271     | 11790  |         |         |
| Solution                                                            | Wavelength λ <sub>max</sub><br>(nm)                                                                                                                                                                                                                                                                                                                                                                                                                                                                                                                                                                                                                                                                                                                                                                                                                                                                                                                                                                    | Extinction coeff. ε<br>(L.mol <sup>-1</sup> .cm <sup>-1</sup> ) |                                     |                                                                 |         |               |        |        |         |          |        |         |        |         |         |
| neutral                                                             | 266                                                                                                                                                                                                                                                                                                                                                                                                                                                                                                                                                                                                                                                                                                                                                                                                                                                                                                                                                                                                    | 12384                                                           |                                     |                                                                 |         |               |        |        |         |          |        |         |        |         |         |
| acidic                                                              | 265                                                                                                                                                                                                                                                                                                                                                                                                                                                                                                                                                                                                                                                                                                                                                                                                                                                                                                                                                                                                    | 12327                                                           |                                     |                                                                 |         |               |        |        |         |          |        |         |        |         |         |
| basic                                                               | 271                                                                                                                                                                                                                                                                                                                                                                                                                                                                                                                                                                                                                                                                                                                                                                                                                                                                                                                                                                                                    | 11790                                                           |                                     |                                                                 |         |               |        |        |         |          |        |         |        |         |         |
| Flammability (state purity)                                         | Not a flammable solid (97.7%)                                                                                                                                                                                                                                                                                                                                                                                                                                                                                                                                                                                                                                                                                                                                                                                                                                                                                                                                                                          |                                                                 |                                     |                                                                 |         |               |        |        |         |          |        |         |        |         |         |
| Self-heating (state purity)                                         | Not a self-heating substance (97.7%)                                                                                                                                                                                                                                                                                                                                                                                                                                                                                                                                                                                                                                                                                                                                                                                                                                                                                                                                                                   |                                                                 |                                     |                                                                 |         |               |        |        |         |          |        |         |        |         |         |
| Explosive properties (state purity)                                 | Not explosive (97.7%)                                                                                                                                                                                                                                                                                                                                                                                                                                                                                                                                                                                                                                                                                                                                                                                                                                                                                                                                                                                  |                                                                 |                                     |                                                                 |         |               |        |        |         |          |        |         |        |         |         |
| Oxidising properties (state purity)                                 | Not oxidising (97.7%)                                                                                                                                                                                                                                                                                                                                                                                                                                                                                                                                                                                                                                                                                                                                                                                                                                                                                                                                                                                  |                                                                 |                                     |                                                                 |         |               |        |        |         |          |        |         |        |         |         |

**Summary of representative uses evaluated, for which all risk assessments needed to be completed (*fludioxonil*)**  
**(Regulation (EU) N° 284/2013, Annex Part A, points 3, 4)**

| Crop and/or situation (a)   | Member State | Product Name | F G I (b) | Pests or group of pests (c)                                                                                                           | Preparation |                | Application       |                                     |                    |                                    | Application rate per treatment |                                    |                                                 | PHI (days) (m) | Remarks                                                                                                                                           |
|-----------------------------|--------------|--------------|-----------|---------------------------------------------------------------------------------------------------------------------------------------|-------------|----------------|-------------------|-------------------------------------|--------------------|------------------------------------|--------------------------------|------------------------------------|-------------------------------------------------|----------------|---------------------------------------------------------------------------------------------------------------------------------------------------|
|                             |              |              |           |                                                                                                                                       | Type (d-f)  | Conc. a.s. (i) | Method kind (f-h) | range of growth stages & season (j) | number min-max (k) | Interval between application (min) | kg a.s./hL min-max (l)         | Water L/ha min-max                 | kg a.s./ha min-max (l)                          |                |                                                                                                                                                   |
| Grapes, wine                | EU S         | A8240D       | F         | <i>Botrytis cinerea</i>                                                                                                               | WG          | 500 g/kg       | Foliar            | BBCH BBCH 85-89 <sup>67</sup>       | 1-2                | 21                                 | 0.0417-0.0625                  | 800-1200                           | 0.5 kg a.s./ha<br>1.0 kg a.s./ha/<br>season     | 21             |                                                                                                                                                   |
| Grapes, table               | EU S         | A8240D       | F         | <i>Botrytis cinerea</i>                                                                                                               | WG          | 500 g/kg       | Foliar            | BBCH 67-69<br>BBCH 85-89            | 1-2                | 21                                 | 0.0417-0.0625                  | 800-1200                           | 0.5 kg a.s./ha<br>1.0 kg a.s./ha/<br>season     | 7              |                                                                                                                                                   |
| Pome fruit (apple and pear) | EU           | A8240D       | F         | Storage diseases ( <i>Gloeosporium spp.</i> , <i>Penicillium spp.</i> , <i>Botrytis spp.</i> , <i>Monilia spp.</i> )                  | WG          | 500 g/kg       | Foliar            | BBCH 74-89                          | 1-2                | 7                                  | 0.015-0.075                    | 300-1500                           | 0.225 kg a.s./ha<br>0.450 kg a.s./ha/<br>season | 3              |                                                                                                                                                   |
| Strawberry                  | EU           | A8240D       | F/G       | <i>Botrytis cinerea</i>                                                                                                               | WG          | 500 g/kg       | Foliar            | BBCH 61-89                          | 1-2                | 10                                 | 0.0125-0.0833                  | 300-2000                           | 0.25 kg a.s./ha<br>0.5 kg a.s./ha/<br>season    | 3              |                                                                                                                                                   |
| Wheat                       | EU           | A8207M       | F         | <i>Fusarium spp.</i> , <i>Monographella nivalis</i> , <i>Tilletia caries</i> , <i>Tilletia foetida</i> , <i>Leptosphaeria nodorum</i> | FS          | 25 g/L         | Seed treatment    | BBCH 00                             | 1                  | Not applicable                     | Not applicable                 | Slurry volume 0-1.5 L/100 kg seeds | 0.0125                                          | -              | 0.2 L product/ 100 kg seeds<br>Seeding rate: maximum 250 kg seeds/ha<br>TGW: 45-55 g/1000 seeds<br>5 g a.s./100 kg seeds<br>2.75 max µg a.s./seed |
| Oat                         | EU           | A8207M       | F         | <i>Fusarium spp.</i> , <i>Pyrenophora avenae</i>                                                                                      | FS          | 25 g/L         | Seed treatment    | BBCH 00                             | 1                  | Not applicable                     | Not applicable                 | Slurry volume 0-1.5 L/100 kg seeds | 0.0085                                          | -              | 0.2 L product/ 100 kg seeds<br>Seeding rate: maximum 170 kg seeds/ha<br>TGW: 30-45 g/1000 seeds<br>5 g a.s./100 kg seeds<br>2.25 max µg a.s./seed |

TGW – thousand grain weight

|                                                                                                                                                                             |                                                                                                                                                                                                                 |
|-----------------------------------------------------------------------------------------------------------------------------------------------------------------------------|-----------------------------------------------------------------------------------------------------------------------------------------------------------------------------------------------------------------|
| (a) For crops, the EU and Codex classifications (both) should be taken into account; where relevant, the use situation should be described (e.g. fumigation of a structure) | (i) g/kg or g/L. Normally the rate should be given for the active substance (according to ISO) and not for the variant in order to compare the rate for same active substances used in different variants (e.g. |
| (b) Outdoor or field use (F), greenhouse application (G) or indoor application (I)                                                                                          |                                                                                                                                                                                                                 |

|                                                                                                                                                                                                                                                                                                                                                                                                                                                                                                                                                                                                                    |                                                                                                                                                                                                                                                                                                                                                                                                                                                                                                                                                                                                                                                                                                                                            |
|--------------------------------------------------------------------------------------------------------------------------------------------------------------------------------------------------------------------------------------------------------------------------------------------------------------------------------------------------------------------------------------------------------------------------------------------------------------------------------------------------------------------------------------------------------------------------------------------------------------------|--------------------------------------------------------------------------------------------------------------------------------------------------------------------------------------------------------------------------------------------------------------------------------------------------------------------------------------------------------------------------------------------------------------------------------------------------------------------------------------------------------------------------------------------------------------------------------------------------------------------------------------------------------------------------------------------------------------------------------------------|
| <p>(c) <i>e.g.</i> biting and sucking insects, soil born insects, foliar fungi, weeds</p> <p>(d) <i>e.g.</i> wettable powder (WP), emulsifiable concentrate (EC), granule (GR)</p> <p>(e) CropLife International Technical Monograph no 2, 6th Edition. Revised May 2008. Catalogue of pesticide</p> <p>(f) All abbreviations used must be explained</p> <p>(g) Method, <i>e.g.</i> high volume spraying, low volume spraying, spreading, dusting, drench</p> <p>(h) Kind, <i>e.g.</i> overall, broadcast, aerial spraying, row, individual plant, between the plant- type of equipment used must be indicated</p> | <p>fluoroxypyr). <b>In certain cases, where only one variant is synthesised, it is more appropriate to give the rate for the variant (e.g. benthialicarb-isopropyl).</b></p> <p>(j) Growth stage range from first to last treatment (BBCH Monograph, Growth Stages of Plants, 1997, Blackwell, ISBN 3-8263-3152-4), including where relevant, information on season at time of application</p> <p>(k) Indicate the minimum and maximum number of applications possible under practical conditions of use</p> <p>(l) The values should be given in g or kg whatever gives the more manageable number (<i>e.g.</i> 200 kg/ha instead of 200 000 g/ha or 12.5 g/ha instead of 0.0125 kg/ha)</p> <p>(m) PHI - minimum pre-harvest interval</p> |
|--------------------------------------------------------------------------------------------------------------------------------------------------------------------------------------------------------------------------------------------------------------------------------------------------------------------------------------------------------------------------------------------------------------------------------------------------------------------------------------------------------------------------------------------------------------------------------------------------------------------|--------------------------------------------------------------------------------------------------------------------------------------------------------------------------------------------------------------------------------------------------------------------------------------------------------------------------------------------------------------------------------------------------------------------------------------------------------------------------------------------------------------------------------------------------------------------------------------------------------------------------------------------------------------------------------------------------------------------------------------------|

### Further information, Efficacy

#### Effectiveness (Regulation (EU) N° 284/2013, Annex Part A, point 6.2)

No new data have been provided (not required for renewal of approval of active substances).

Fludioxonil containing products A8207M (Celest) and A8240D (Geoxe) have been tested in field development trials and has demonstrated efficacious activity.

Fludioxonil containing products A8207M (Celest) and A8240D (Geoxe) are registered in many EU countries based on detailed national assessments of the efficacy package in compliance with Regulation (EC) No 545/2011 and according to the Uniform Principles (Regulation (EC) No 546/2011).

More detailed consideration will be fully assessed in the context of any subsequent applications for product authorisation.

#### Adverse effects on field crops (Regulation (EU) N° 284/2013, Annex Part A, point 6.4)

Same as above.

#### Observations on other undesirable or unintended side-effects (Regulation (EU) N° 284/2013, Annex Part A, point 6.5)

Same as above.

#### Groundwater metabolites: Screening for biological activity (SANCO/221/2000-rev.10-final Step 3 a Stage 1)

|                                  | CGA192155 | CGA339833 |
|----------------------------------|-----------|-----------|
| Activity against target organism | no        | no        |

Open for some other metabolites

## Methods of Analysis

### Analytical methods for the active substance (Regulation (EU) N° 283/2013, Annex Part A, point 4.1 and Regulation (EU) N° 284/2013, Annex Part A, point 5.2)

|                                                     |                                                               |
|-----------------------------------------------------|---------------------------------------------------------------|
| Technical a.s. (analytical technique)               | HPLC-UV                                                       |
| Impurities in technical a.s. (analytical technique) | HPLC-UV                                                       |
| Plant protection product (analytical technique)     | HPLC-UV<br>Data gap: method for relevant impurity (SYN549129) |

### Analytical methods for residues (Regulation (EU) N° 283/2013, Annex Part A, point 4.2 & point 7.4.2)

#### Residue definitions for monitoring purposes

|                         |                                                                                                                                                                       |
|-------------------------|-----------------------------------------------------------------------------------------------------------------------------------------------------------------------|
| Food of plant origin    | Fludioxonil                                                                                                                                                           |
| Food of animal origin   | Sum of fludioxonil and its metabolites, which can be oxidised to metabolite CGA 192155 (2,2-difluoro-2H-1,3-benzodioxole-4-carboxylic acid), expressed as fludioxonil |
| Soil                    | Fludioxonil                                                                                                                                                           |
| Sediment                | Fludioxonil                                                                                                                                                           |
| Water surface           | Fludioxonil                                                                                                                                                           |
| drinking/ground         | Fludioxonil                                                                                                                                                           |
| Air                     | Fludioxonil                                                                                                                                                           |
| Body fluids and tissues | Sum of fludioxonil and its metabolites, which can be oxidised to metabolite CGA 192155 (2,2-difluoro-2H-1,3-benzodioxole-4-carboxylic acid), expressed as fludioxonil |

#### Monitoring/Enforcement methods

|                                                                                               |                                                                                                                   |
|-----------------------------------------------------------------------------------------------|-------------------------------------------------------------------------------------------------------------------|
| Food/feed of plant origin (analytical technique and LOQ for methods for monitoring purposes)  | Multi-residue method QuEChERS:<br>fludioxonil<br>HPLC-MS/MS, 0.01 mg/kg<br><b>Data gap:</b> Extraction efficiency |
| Food/feed of animal origin (analytical technique and LOQ for methods for monitoring purposes) | GRM025.03A:<br>After oxidation to CGA 192155<br>HPLC-MS/MS, 0.01 mg/kg (expressed as fludioxonil)                 |
| Soil (analytical technique and LOQ)                                                           | GRM025.06A:<br>fludioxonil<br>HPLC-MS/MS, 0.01 mg/kg                                                              |
| Water (analytical technique and LOQ)                                                          | GRM025.01A:<br>fludioxonil<br>HPLC-MS/MS, 0.05 µg/L                                                               |
| Air (analytical technique and LOQ)                                                            | REM 133.03:<br>fludioxonil<br>HPLC-UV, 2 µg/m <sup>3</sup>                                                        |

Body fluids and tissues (analytical technique and LOQ)

|                                                                                                   |
|---------------------------------------------------------------------------------------------------|
| GRM025.03A:<br>After oxidation to CGA 192155<br>HPLC-MS/MS, 0.01 mg/kg (expressed as fludioxonil) |
|---------------------------------------------------------------------------------------------------|

**Classification and labelling with regard to physical and chemical data (Regulation (EU) N° 283/2013, Annex Part A, point 10)**

Substance

|             |
|-------------|
| Fludioxonil |
|-------------|

Harmonised classification according to Regulation (EC) No 1272/2008 and its Adaptations to Technical Process [Table 3.1 of Annex VI of Regulation (EC) No 1272/2008 as amended]<sup>1</sup>:

|      |
|------|
| none |
|------|

According to the Peer review, the criteria for classification according to Regulation (EC) No 1272/2008 may be met for:

|      |
|------|
| none |
|------|

<sup>1</sup> Regulation (EC) No 1272/2008 of the European Parliament and of the Council of 16 December 2008 on classification, labelling and packaging of substances and mixtures, amending and repealing Directives 67/548/EEC and 1999/45/EC, and amending Regulation (EC) No 1907/2006. OJ L 353, 31.12.2008, 1-1355.



## Impact on Human and Animal Health

### Absorption, distribution, metabolism and excretion (toxicokinetics) (Regulation (EU) N° 283/2013, Annex Part A, point 5.1)

|                                                             |                                                                                                                                                                                                                                                                                                                                                                                                                                                                                                      |
|-------------------------------------------------------------|------------------------------------------------------------------------------------------------------------------------------------------------------------------------------------------------------------------------------------------------------------------------------------------------------------------------------------------------------------------------------------------------------------------------------------------------------------------------------------------------------|
| Rate and extent of oral absorption/systemic bioavailability | 56 % in male 76% in females (based on oral bioavailability vs Iv administration)<br>Value considered for the AOEL: 56% (worst case value).                                                                                                                                                                                                                                                                                                                                                           |
| Toxicokinetics                                              | <u>C<sub>max</sub></u> : 0.027-0.0.65 and 3.2-4.5 ppm in animals dosed at 0.5 and 100 mg/kg bw respectively<br><u>T<sub>max</sub></u> : 0.25 hours and 4-8 hours ppm in animals dosed at 0.5 and 100 mg/kg respectively                                                                                                                                                                                                                                                                              |
| Distribution                                                | Uniformly distributed (highest residues found in liver , kidney and lungs)                                                                                                                                                                                                                                                                                                                                                                                                                           |
| Potential for bioaccumulation                               | No evidence for accumulation                                                                                                                                                                                                                                                                                                                                                                                                                                                                         |
| Rate and extent of excretion                                | 15 % in the urine and about 70 % in the faeces within 24 hours.<br>The excretion was mainly via the bile.                                                                                                                                                                                                                                                                                                                                                                                            |
| Metabolism in animals                                       | Extensive metabolism: no parent compound in urine, approx. 10% parent in faeces.<br>Phase I: major metabolic pathway is oxidation at position 2 of the pyrrole ring; minor pathways are oxidation at position 5 of the pyrrole ring and hydroxylation of the phenyl ring.<br>Phase II: predominantly glucuronidation, in bile approx. 56% of glucuronide conjugate of metabolite SYN 518577.<br>After repeated exposure: blue coloured metabolite in urine resulting from autoxidative dimerization. |
| <i>In vitro</i> metabolism                                  | No qualitative difference between human and rat microsomes.<br>Extensively metabolised in rat liver incubates, slightly lesser in in human liver incubates.                                                                                                                                                                                                                                                                                                                                          |
| Toxicologically relevant compounds (animals and plants)     | Fludioxonil and its metabolites, which can be oxidised to metabolite CGA192155 (2,2-difluoro-2H-1,3-benzodioxole-4-carboxylic acid)<br>CGA227731.                                                                                                                                                                                                                                                                                                                                                    |
| Toxicologically relevant compounds (environment)            | Fludioxonil; open for metabolites.                                                                                                                                                                                                                                                                                                                                                                                                                                                                   |

### Acute toxicity (Regulation (EU) N° 283/2013, Annex Part A, point 5.2)

|                                 |                                                                                          |                |
|---------------------------------|------------------------------------------------------------------------------------------|----------------|
| Rat LD <sub>50</sub> oral       | > 5000 mg/kg bw                                                                          | Not classified |
|                                 |                                                                                          | Not classified |
| Rat LD <sub>50</sub> dermal     | > 2000 mg/kg bw                                                                          | Not classified |
| Rat LC <sub>50</sub> inhalation | >2.636 mg/L air /4h ( <i>nose only</i> )<br>Highest technically achievable concentration | Not classified |
| Skin irritation                 | Non-irritant                                                                             | Not classified |
| Eye irritation                  | Non-irritant                                                                             | Not classified |

|                    |                       |                |
|--------------------|-----------------------|----------------|
| Skin sensitisation | Non-sensitising (M&K) | Not classified |
| Phototoxicity      | Not phototoxic        |                |

**Short-term toxicity (Regulation (EU) N° 283/2013, Annex Part A, point 5.3)**

|                                |                                                                                                                                                                                                                                                                                           |                                      |
|--------------------------------|-------------------------------------------------------------------------------------------------------------------------------------------------------------------------------------------------------------------------------------------------------------------------------------------|--------------------------------------|
| Target organ / critical effect | Liver; rat, mice, dog (increased weight, hepatocyte hypertrophy, bile duct proliferation)<br>Kidney; rat, mice (increased weight, nephropathy)<br>General signs (whole body), dog (body weight changes)<br>Blood chemical examination (Blood serum (Lipid)), dog (increased cholesterol). | Not classified<br><br>Not classified |
| Relevant oral NOAEL            | 28-day, rat: 10 mg/kg bw per day (gavage)<br>90-day, rat: 64 mg/kg bw per day<br>90-day, mouse : 445 mg/kg bw per day<br>90-day, dog: 58.5 mg/kg bw per day<br>1-year, dog: 33 mg/kg bw per day                                                                                           |                                      |
| Relevant dermal NOAEL          | 28-day, rat:<br>Systemic effects: 200 mg/kg bw/day<br>local effect: 1000 mg/kg bw per day                                                                                                                                                                                                 |                                      |
| Relevant inhalation NOAEL      | No data - not required                                                                                                                                                                                                                                                                    |                                      |

**Genotoxicity (Regulation (EU) N° 283/2013, Annex Part A, point 5.4)**

|                            |                                                                                                                                                                                                                                                                                                                                                                                                                                |                |
|----------------------------|--------------------------------------------------------------------------------------------------------------------------------------------------------------------------------------------------------------------------------------------------------------------------------------------------------------------------------------------------------------------------------------------------------------------------------|----------------|
| <i>In vitro</i> studies    | 3 Bacterial reverse mutation assays – negative<br><i>In vitro</i> mammalian cell gene mutation test – negative<br><i>In vitro</i> mammalian cytogenetic test in Chinese hamster ovary – positive (+/- S9)<br><i>In vitro</i> mammalian cell DNA repair test - positive                                                                                                                                                         |                |
| <i>In vivo</i> studies     | Chromosome aberration test in Chinese hamster bone marrow – negative<br>Micronucleus test in mouse bone marrow – negative<br>Micronucleus test in rat hepatocytes (1991)–equivocal, study repeated<br>Micronucleus test in rat hepatocytes (1999)–negative<br>Aneuploidy test in rat bone marrow – negative<br>UDS and replicative DNA synthesis test in rat hepatocytes – negative<br>Dominant lethal test in mice - negative |                |
| Photomutagenicity          | Not required: negative response from the phototoxicity test                                                                                                                                                                                                                                                                                                                                                                    |                |
| Potential for genotoxicity | Fludioxonil is unlikely to be genotoxic                                                                                                                                                                                                                                                                                                                                                                                        | Not classified |

|  |                |
|--|----------------|
|  | Not classified |
|--|----------------|

**Long-term toxicity and carcinogenicity (Regulation (EU) N°283/2013, Annex Part A, point 5.5)**

|                                                  |                                                                                                                                             |                                      |
|--------------------------------------------------|---------------------------------------------------------------------------------------------------------------------------------------------|--------------------------------------|
| Long-term effects (target organ/critical effect) | Rat & mouse:<br>Liver (increased weight, hepatocyte hypertrophy, bile duct proliferation)<br>Kidney (increased weight, renal tubular casts) | Not classified<br><br>Not classified |
| Relevant long-term NOAEL                         | 2-year, rat: 37 mg/kg bw per day<br>18-month, mouse: 112 mg/kg bw per day                                                                   |                                      |
| Carcinogenicity (target organ, tumour type)      | Rat: no treatment-related tumours<br>Mouse: no treatment-related tumours                                                                    | Not classified                       |
| Relevant NOAEL for carcinogenicity               | 2-year, rat: 113 mg/kg bw per day;<br>18-month, mouse: 851 mg/kg bw per day                                                                 |                                      |

**Reproductive toxicity (Regulation (EU) N° 283/2013, Annex Part A, point 5.6)**

**Reproduction toxicity**

|                                       |                                                                                                                                                                                                                                                                                                                                                                                                                                                                                                                                                                                                                                                                                                                                                                                                                                               |               |
|---------------------------------------|-----------------------------------------------------------------------------------------------------------------------------------------------------------------------------------------------------------------------------------------------------------------------------------------------------------------------------------------------------------------------------------------------------------------------------------------------------------------------------------------------------------------------------------------------------------------------------------------------------------------------------------------------------------------------------------------------------------------------------------------------------------------------------------------------------------------------------------------------|---------------|
| Reproduction target / critical effect | <u>Parental toxicity</u> : reduced bodyweight and body weight gain in an existing 2-generation-study; in a new 2-generation reproductive toxicity study increased liver weight; increased kidney weight (M) with nephropathy and inclusions; decreased adrenals weights, decreased thyroid weight.<br><u>Reproductive toxicity</u> : no adverse effect observed in an existing 2-generation-study; in a new 2-generation toxicity study : delayed preputial separation, decreased number of estrus cycles, increased estrus cycle length, decreased number of implantations, decreased number of born live animals, decreased ano-genital distance.<br><u>Offspring's toxicity</u> : reduced growth during lactation in an existing 2-generation-study; in a new 2-generation reproductive toxicity study delayed balano-preputial separation | Repr. 2 H361f |
| Relevant parental NOAEL               | Existing 2-gen: 18.9 mg/kg bw per day/new 2-gen. 175 mg/kg bw/day                                                                                                                                                                                                                                                                                                                                                                                                                                                                                                                                                                                                                                                                                                                                                                             |               |
| Relevant reproductive NOAEL           | Existing 2-gen 188 mg/kg bw per day/new 2-gen. 58 mg/kg bw/day                                                                                                                                                                                                                                                                                                                                                                                                                                                                                                                                                                                                                                                                                                                                                                                |               |
| Relevant offspring NOAEL              | Existing 2-gen 18.9 mg/kg bw per day/new 2-gen 58 mg/kg bw/day                                                                                                                                                                                                                                                                                                                                                                                                                                                                                                                                                                                                                                                                                                                                                                                |               |

**Developmental toxicity**

|                                        |      |                |
|----------------------------------------|------|----------------|
| Developmental target / critical effect | Rat: | Not classified |
|----------------------------------------|------|----------------|

|                              |                                                                                                                                                                                                                                                                                                                                  |  |
|------------------------------|----------------------------------------------------------------------------------------------------------------------------------------------------------------------------------------------------------------------------------------------------------------------------------------------------------------------------------|--|
|                              | <p>Maternal toxicity: decreased body weight gain and food consumption</p> <p>Developmental toxicity: increased fetal and litter incidences of ureteral and/or pelvic dilatations</p> <p>Rabbit:</p> <p>Maternal toxicity: decreased body weight gain and food consumption</p> <p>Developmental toxicity : no adverse effects</p> |  |
| Relevant maternal NOAEL      | <p>Rat: 100 mg/kg bw per day</p> <p>Rabbit: 100 mg/kg bw per day</p>                                                                                                                                                                                                                                                             |  |
| Relevant developmental NOAEL | <p>Rat: 10 mg/kg bw per day</p> <p>Rabbit: 300 mg/kg bw per day</p>                                                                                                                                                                                                                                                              |  |

**Neurotoxicity (Regulation (EU) N° 283/2013, Annex Part A, point 5.7)**

|                                                                              |                                                                                                                                                                                                                                              |                |
|------------------------------------------------------------------------------|----------------------------------------------------------------------------------------------------------------------------------------------------------------------------------------------------------------------------------------------|----------------|
| Acute neurotoxicity                                                          | <p>Rat: Acute neurotoxicity study in rats: reduced locomotor activity. Reduced mean body weight gain and food consumption.</p> <p>NOAEL<sub>neurotoxicity</sub> &lt; 500 mg/kg bw</p> <p>NOAEL<sub>general toxicity</sub> = 500 mg/kg bw</p> | Not classified |
| Repeated neurotoxicity                                                       | <p>90-day neurotoxicity study in rats: no indications of neurotoxicity. Reduced body weight gain</p> <p>NOAEL<sub>neurotoxicity</sub> = 493 mg/kg bw/day</p> <p>NOAEL<sub>general toxicity</sub> = 207 mg/kg bw/day</p>                      |                |
| Additional studies (e.g. delayed neurotoxicity, developmental neurotoxicity) | Study not required                                                                                                                                                                                                                           |                |

**Other toxicological studies (Regulation (EU) N° 283/2013, Annex Part A, point 5.8)**

|                                                |                                                                                                                                                                                                                                                                                                                                                                                                                                                                                                                                                                                       |  |
|------------------------------------------------|---------------------------------------------------------------------------------------------------------------------------------------------------------------------------------------------------------------------------------------------------------------------------------------------------------------------------------------------------------------------------------------------------------------------------------------------------------------------------------------------------------------------------------------------------------------------------------------|--|
| Supplementary studies on the active substance  | <p>28 day immunotoxicity study in the mouse. No evidence of immunosuppression or general toxicity</p> <p>NOAEL<sub>immunotoxicity</sub> = 1230 mg/kg bw/day</p> <p>NOAEL<sub>general toxicity</sub> = 1230 mg/kg bw/day</p>                                                                                                                                                                                                                                                                                                                                                           |  |
| Endocrine disrupting properties                | <p>The <b>T-modality</b> has been considered sufficiently investigated and a pattern of T-mediated adversity was not identified (scenario 1a of the ECHA/EFSA ED Guidance 2018).</p> <p>Fludioxonil is an endocrine disruptor for the <b>EAS- modalities</b> according to the ED scientific criteria laid down in Regulation (EC) 2018/605 (<b>scenario 1b</b> of the ECHA/EFSA ED Guidance 2018).</p> <p><b>NOAEL/LOAEL (endocrine adversity)</b> = 58/175 mg/kg bw per day respectively based on delayed sexual maturation in males in the 2-generation toxicity study in rats.</p> |  |
| Studies performed on metabolites or impurities |                                                                                                                                                                                                                                                                                                                                                                                                                                                                                                                                                                                       |  |
| Metabolites, Group 1                           | <p><u>Group accepted:</u></p> <p><b>SYN518576, SYN518577, SYN518578 and their glucuronide and sulfate conjugates</b></p> <p>Toxicological profile (genotoxicity and general toxicity) covered by parent (fludioxonil)</p>                                                                                                                                                                                                                                                                                                                                                             |  |

Metabolites, Group 2

**Group not yet accepted**

**CGA173506 lactic acid (SYN551031)**

Ames test: negative

*In vitro* micronucleus test: positive

*In vivo* micronucleus test: negative

Proof of bone marrow exposure

→ **Unlikely to be genotoxic.**

→ **For general toxicity conclusion cannot be drawn based on the data provided.**

**CGA339833:**

Acute Oral: LD<sub>50</sub>>2000 mg/kg bw

90 day feeding: NOAEL = 800 ppm (58 mg/kg bw/day in males)

Ames test: negative

Gene mutation in mammalian cells: positive (- S9 24h)

*In vitro* cytogenetic test in Chinese hamster cells: positive (-S9: 18h)

*In vivo* micronucleus test in rat bone marrow: negative

Proof of bone marrow exposure in rat.

Comet assay negative

→ **Unlikely to be genotoxic**

→ **ADI: 0.29 mg/kg bw/day**

based on NOAEL of 800 ppm (58 mg/kg bw/day) in the 90-day study

UF = 200 extra factor of 2 for extrapolation from subacute to subchronic or from subchronic to chronic exposure

The metabolite showed a different toxicological profile (i.e. qualitatively than parent, additional target organs identified).

**CGA308103:**

Acute Oral: LD<sub>50</sub> >1000 mg/kg bw, <2000 mg/kg bw

Ames test: negative

*In vitro* micronucleus test: negative

→ **Unlikely to be genotoxic**

→ **For general toxicity read-across to CGA339833, agreed**

**ADI of CGA339833 can apply**

**Group accepted:**

CGA308103 and CGA339833 are the lead compounds and their toxicological profile cover CGA344624, CGA344623 and SYN518581.

Metabolites, Group 3

**CGA265378:**

Acute Oral: LD<sub>50</sub>>2000 mg/kg bw

Ames test: negative

Gene mutation in mammalian cells: negative

*In vitro* chromosome aberrations : positive

*In vivo* micronucleus test: negative

Proof of bone marrow exposure (qualitative method)

**Group accepted:**

Metabolites, Group 4

**CGA265378 is the lead compound and its toxicological profile would cover SYN518579 and SYN518579 tautomer**  
 →Unlikely to be genotoxic  
 → For general toxicity conclusion cannot be drawn based on the data provided (data gap for the lead compound).

Metabolites, No group

**CGA335892**  
 Genotoxicity and general toxicity: inconclusive based on QSAR prediction.  
 Glucuronide conjugate: covered by CGA335892.

**CGA192155:**  
 Acute Oral: LD<sub>50</sub>>2000 mg/kg bw  
 Ames test: negative  
 Gene mutation in mammalian cells: negative  
 In vitro cytogenetic test in Chinese hamster cells: positive (-S9)  
 In vivo micronucleus test in mouse bone marrow: negative  
 Proof of bone marrow exposure  
 →**Non genotoxic**  
 28 day feeding; NOEL = 5000 ppm (382/389 mg/kg bw/day)  
 90 day feeding; NOAEL = 1000 ppm (57.5/66.2 mg/kg bw/day); toxicological profile is qualitatively similar to the parent and it is considered not more toxic than the parent.  
 → **The reference values of the parent can apply**

**CGA227731**  
 Ames test: positive  
 In vitro micronucleus test: negative  
*In vivo* comet assay: positive  
 →**Genotoxic**  
 →**For general toxicity: setting of reference values not possible due to the genotoxic potential.**

**CGA308565:**  
 Acute Oral: LD<sub>50</sub>>2000 mg/kg bw  
 Ames test: negative  
*In vitro* micronucleus test: positive  
*In vivo* micronucleus test: negative  
 Proof of bone marrow exposure  
 → **Unlikely to be genotoxic**  
 → **For general toxicity conclusion cannot be drawn based on the data provided**

**SYN518580**  
 Genotoxicity and general toxicity: inconclusive based on QSAR prediction.

Relevant impurity

**SYN549129**  
 Relevant (teratogenicity concern based on QSAR prediction, maximum content of 3 g/kg).

**Medical data (Regulation (EU) N° 283/2013, Annex Part A, point 5.9)**

No adverse effects on health in manufacturing personnel  
 A review of the exposure incidences of fludioxonil formulations reported between 2004 and 2014 has been conducted. After occupational, accidental, intentional and uncertain exposure only health effects of transient nature were observed, with almost all causing no or mild symptoms (92%). All other incidents were assigned to moderate severity grade.  
 No epidemiological studies are available.

**Summary<sup>2</sup> (Regulation (EU) N°1107/2009, Annex II, point 3.1 and 3.6)**

**Fludioxonil**

Acceptable Daily Intake (ADI) <sup>(a)</sup>

Acute Reference Dose (ARfD) <sup>(a)</sup>

Acceptable Operator Exposure Level (AOEL)

Acute Acceptable Operator Exposure Level (AAOEL)

| Value<br>(mg/kg bw (per day)) | Study                                                           | Uncertainty factor |
|-------------------------------|-----------------------------------------------------------------|--------------------|
| <b>0.37</b>                   | 2-year rat study                                                | 100                |
| <b>1</b>                      | Rat and rabbit, developmental study (maternal NOAEL)            | 100                |
| <b>0.2</b>                    | 1-year dog study, supported by short- and long-term rat studies | 178*               |
| <b>0.56</b>                   | Rat and rabbit, developmental study (maternal NOAEL)            | 178*               |

\* Including correction for limited oral absorption/bioavailability (56 %).

<sup>(a)</sup> Applicable to metabolites CGA192155 and SYN518576, SYN518577, SYN518578 and their glucuronide and sulfate conjugates.

During the previous peer review the same ADI was set; ARfD and AAOEL were not set and a different AOEL was set (EFSA, 2007)

**Summary<sup>3</sup> (Regulation (EU) N°1107/2009, Annex II, point 3.1 and 3.6)**

**CGA339833**

Acceptable Daily Intake (ADI) <sup>(a)</sup>

| Value<br>(mg/kg bw (per day)) | Study        | Uncertainty factor |
|-------------------------------|--------------|--------------------|
| <b>0.29</b>                   | 90-day study | 200                |

<sup>(a)</sup> Applicable to CGA308103, CGA344624, CGA344623 and SYN518581.

**Dermal absorption (Regulation (EU) N° 284/2013, Annex Part A, point 7.3)**

Representative formulation 'A8207M'

Fludioxonil FS 25g/L

Concentrate: 0.4 %  
*In vitro human study performed on formulation*

<sup>2</sup> If available include also reference values for metabolites

<sup>3</sup> If available include also reference values for metabolites

Representative formulation 'A8240D'  
Fludioxonil WG 500 g/L

|                                                      |       |
|------------------------------------------------------|-------|
| Concentrate: 0.1 %                                   |       |
| Concentrate (250 g/L)                                | 0.07% |
| Dilution 1: 0.83 g/L                                 | 5%    |
| Dilution 2: 0.42 g/L                                 | 5%    |
| Dilution 3 : 0.125 g/L                               | 8%    |
| <i>In vitro human study performed on formulation</i> |       |

**Exposure scenarios (Regulation (EU) N° 284/2013, Annex Part A, point 7.2)**

Operators

|                                                                            |                  |
|----------------------------------------------------------------------------|------------------|
| <b>A8207M FS 25 g/L</b>                                                    |                  |
| <u>Use:</u> cereals, seed treatment, application rate 5 g a.s./100 kg seed |                  |
| <u>Exposure estimates:</u>                                                 | <u>% of AOEL</u> |
| <b>Generic SeedTropex geometric mean values</b>                            |                  |
| <i>Seed treatment</i>                                                      |                  |
| With PPE (gloves) – 70kg (scenario 1):                                     | 11               |
| With PPE (gloves)– 60kg (scenario 1):                                      | 13               |
| <i>Loading and Sowing</i>                                                  |                  |
| Without PPE – 70 kg:                                                       | 1.3              |
| Without PPE – 60 kg:                                                       | 1.6              |
| <i>Without PPE means:</i>                                                  |                  |
| <i>SeedTropex: Operator wearing one layer of work clothing</i>             |                  |



**A8240D WG 500 g/kg**

Use: grapes, tractor mounted airblast application, application rate 0.5 kg a.s./ha

**EFSA model (AOEM):**

Without PPE AOEL: 8.9

Without PPE AAOEL: 12

Use: pome fruit, tractor mounted airblast application, application rate 0.225 kg a.s./ha

**EFSA model (AOEM):**

Without PPE AOEL: 6.6

Without PPE AAOEL: 8.6

Use: strawberries outdoors, tractor mounted boom sprayer, application rate 0.250 kg a.s./ha

**EFSA model (AOEM):**

Without PPE AOEL: 2

Without PPE AAOEL: 4.5

Use: strawberries indoor, hand-held application indoors, application rate 0.250 kg a.s./ha

**EFSA model (AOEM) outdoor by default upward:**

Hand-held sprayer/Manual-knapsack

Without PPE AOEL: 3.6/1.8

Without PPE AAOEL: 4.1/1.7

**EFSA model (AOEM) outdoor by default downward:**

Hand-held sprayer/Manual-knapsack

Without PPE AOEL: 7.5/7.5

Without PPE AAOEL: 17/16

**Dutch Greenhouse model:**

Without PPE AOEL: 30

**German IVA model:**

Without PPE AOEL: 2.4

*Without PPE means:*

*EFSA Guidance: Operator wearing long sleeved shirt, long trousers ("permeable") but no gloves*

*Southern Greenhouse Model (ECPA): Operator wearing one layer of work clothing*

*Dutch Greenhouse Model: Operator wearing normal work clothes*

*German Greenhouse Study (IVA): Operator wearing no clothes*

Workers

|                                                                                                                                                                              |                  |
|------------------------------------------------------------------------------------------------------------------------------------------------------------------------------|------------------|
| <b>A8207M FS 25 g/L</b>                                                                                                                                                      |                  |
| Exposure of operator directly involved in seed treatment as well as exposure of operator loading and sowing treated seeds represent the worst-case covering worker exposure. |                  |
|                                                                                                                                                                              | <u>% of AOEL</u> |
| <b>Generic Seed-TROPEX<br/>fork lift truck drivers</b>                                                                                                                       | 0.04             |

|                                    |                  |
|------------------------------------|------------------|
| <b>A8240D WG 500 g/kg</b>          |                  |
| <u>Use:</u> grapes                 |                  |
| <u>Exposure estimates</u> (model): | <u>% of AOEL</u> |
| <b>EFSA model (AOEM):</b>          |                  |
| Without PPE (work wear):           | 82               |
| <u>Use:</u> pome fruit             |                  |
| <u>Exposure estimates</u> (model): | <u>% of AOEL</u> |
| <b>EFSA model (AOEM):</b>          |                  |
| With PPE (work wear gloves):       | 30               |
| <u>Use:</u> strawberry             |                  |
| <u>Exposure estimates</u> (model): | <u>% of AOEL</u> |
| <b>EFSA model (AOEM):</b>          |                  |
| Outdoors                           |                  |
| Without PPE (work wear):           | 22               |
| Indoors                            |                  |
| Without PPE (work wear):           | 22               |

Bystanders and residents

|                                                                                                                                                                                                                               |  |
|-------------------------------------------------------------------------------------------------------------------------------------------------------------------------------------------------------------------------------|--|
| <b>A8207M FS 25 g/L</b>                                                                                                                                                                                                       |  |
| Based on proposed assumptions, bystander and resident exposures to dust from treated seed during sowing activities, in relation to the amount of active substance that might be present in this dust, are far below the AOEL. |  |

|                                               |                                                                                                                                                                                                                                                                                                                                                                                                                                                                                                                                                                                                                                                                                                                                                                                                                                                                                                                                                                                                                                                                                                                                                                                                                                                                                                                                                                                                                                               |                                       |     |                                       |   |                                      |     |                                      |     |                                       |     |                                       |     |                                      |     |                                      |     |                                               |     |                                               |     |                                      |     |                                      |     |
|-----------------------------------------------|-----------------------------------------------------------------------------------------------------------------------------------------------------------------------------------------------------------------------------------------------------------------------------------------------------------------------------------------------------------------------------------------------------------------------------------------------------------------------------------------------------------------------------------------------------------------------------------------------------------------------------------------------------------------------------------------------------------------------------------------------------------------------------------------------------------------------------------------------------------------------------------------------------------------------------------------------------------------------------------------------------------------------------------------------------------------------------------------------------------------------------------------------------------------------------------------------------------------------------------------------------------------------------------------------------------------------------------------------------------------------------------------------------------------------------------------------|---------------------------------------|-----|---------------------------------------|---|--------------------------------------|-----|--------------------------------------|-----|---------------------------------------|-----|---------------------------------------|-----|--------------------------------------|-----|--------------------------------------|-----|-----------------------------------------------|-----|-----------------------------------------------|-----|--------------------------------------|-----|--------------------------------------|-----|
|                                               | <p><b>A8240D WG 500 g/kg</b></p> <p><u>Use:</u> grapes, tractor mounted airblast application, application rate 0.5 kg a.s./ha Buffer = 5 m</p> <p><b>EFSA model (AOEM):</b></p> <table> <tr> <td>Bystander child spray drift (%AAOEL):</td> <td>1.8</td> </tr> <tr> <td>Bystander adult spray drift (%AAOEL):</td> <td>1</td> </tr> <tr> <td>Resident child all pathways (%AOEL):</td> <td>3.4</td> </tr> <tr> <td>Resident adult all pathways (%AOEL):</td> <td>2.5</td> </tr> </table> <p><u>Use:</u> pome fruit, tractor mounted airblast application, application rate 0.225 kg a.s./ha Buffer = 5 m</p> <p><b>EFSA model (AOEM):</b></p> <table> <tr> <td>Bystander child spray drift (%AAOEL):</td> <td>3.4</td> </tr> <tr> <td>Bystander adult spray drift (%AAOEL):</td> <td>1.9</td> </tr> <tr> <td>Resident child all pathways (%AOEL):</td> <td>6.2</td> </tr> <tr> <td>Resident adult all pathways (%AOEL):</td> <td>3.1</td> </tr> </table> <p><u>Use:</u> strawberries outdoors, tractor mounted boom sprayer, application rate 0.250 kg a.s./ha Buffer = 2-3 m</p> <p><b>EFSA model (AOEM):</b></p> <table> <tr> <td>Bystander child entry into the crop (%AAOEL):</td> <td>1.1</td> </tr> <tr> <td>Bystander adult entry into the crop (%AAOEL):</td> <td>0.6</td> </tr> <tr> <td>Resident child all pathways (%AOEL):</td> <td>3.7</td> </tr> <tr> <td>Resident adult all pathways (%AOEL):</td> <td>1.7</td> </tr> </table> | Bystander child spray drift (%AAOEL): | 1.8 | Bystander adult spray drift (%AAOEL): | 1 | Resident child all pathways (%AOEL): | 3.4 | Resident adult all pathways (%AOEL): | 2.5 | Bystander child spray drift (%AAOEL): | 3.4 | Bystander adult spray drift (%AAOEL): | 1.9 | Resident child all pathways (%AOEL): | 6.2 | Resident adult all pathways (%AOEL): | 3.1 | Bystander child entry into the crop (%AAOEL): | 1.1 | Bystander adult entry into the crop (%AAOEL): | 0.6 | Resident child all pathways (%AOEL): | 3.7 | Resident adult all pathways (%AOEL): | 1.7 |
| Bystander child spray drift (%AAOEL):         | 1.8                                                                                                                                                                                                                                                                                                                                                                                                                                                                                                                                                                                                                                                                                                                                                                                                                                                                                                                                                                                                                                                                                                                                                                                                                                                                                                                                                                                                                                           |                                       |     |                                       |   |                                      |     |                                      |     |                                       |     |                                       |     |                                      |     |                                      |     |                                               |     |                                               |     |                                      |     |                                      |     |
| Bystander adult spray drift (%AAOEL):         | 1                                                                                                                                                                                                                                                                                                                                                                                                                                                                                                                                                                                                                                                                                                                                                                                                                                                                                                                                                                                                                                                                                                                                                                                                                                                                                                                                                                                                                                             |                                       |     |                                       |   |                                      |     |                                      |     |                                       |     |                                       |     |                                      |     |                                      |     |                                               |     |                                               |     |                                      |     |                                      |     |
| Resident child all pathways (%AOEL):          | 3.4                                                                                                                                                                                                                                                                                                                                                                                                                                                                                                                                                                                                                                                                                                                                                                                                                                                                                                                                                                                                                                                                                                                                                                                                                                                                                                                                                                                                                                           |                                       |     |                                       |   |                                      |     |                                      |     |                                       |     |                                       |     |                                      |     |                                      |     |                                               |     |                                               |     |                                      |     |                                      |     |
| Resident adult all pathways (%AOEL):          | 2.5                                                                                                                                                                                                                                                                                                                                                                                                                                                                                                                                                                                                                                                                                                                                                                                                                                                                                                                                                                                                                                                                                                                                                                                                                                                                                                                                                                                                                                           |                                       |     |                                       |   |                                      |     |                                      |     |                                       |     |                                       |     |                                      |     |                                      |     |                                               |     |                                               |     |                                      |     |                                      |     |
| Bystander child spray drift (%AAOEL):         | 3.4                                                                                                                                                                                                                                                                                                                                                                                                                                                                                                                                                                                                                                                                                                                                                                                                                                                                                                                                                                                                                                                                                                                                                                                                                                                                                                                                                                                                                                           |                                       |     |                                       |   |                                      |     |                                      |     |                                       |     |                                       |     |                                      |     |                                      |     |                                               |     |                                               |     |                                      |     |                                      |     |
| Bystander adult spray drift (%AAOEL):         | 1.9                                                                                                                                                                                                                                                                                                                                                                                                                                                                                                                                                                                                                                                                                                                                                                                                                                                                                                                                                                                                                                                                                                                                                                                                                                                                                                                                                                                                                                           |                                       |     |                                       |   |                                      |     |                                      |     |                                       |     |                                       |     |                                      |     |                                      |     |                                               |     |                                               |     |                                      |     |                                      |     |
| Resident child all pathways (%AOEL):          | 6.2                                                                                                                                                                                                                                                                                                                                                                                                                                                                                                                                                                                                                                                                                                                                                                                                                                                                                                                                                                                                                                                                                                                                                                                                                                                                                                                                                                                                                                           |                                       |     |                                       |   |                                      |     |                                      |     |                                       |     |                                       |     |                                      |     |                                      |     |                                               |     |                                               |     |                                      |     |                                      |     |
| Resident adult all pathways (%AOEL):          | 3.1                                                                                                                                                                                                                                                                                                                                                                                                                                                                                                                                                                                                                                                                                                                                                                                                                                                                                                                                                                                                                                                                                                                                                                                                                                                                                                                                                                                                                                           |                                       |     |                                       |   |                                      |     |                                      |     |                                       |     |                                       |     |                                      |     |                                      |     |                                               |     |                                               |     |                                      |     |                                      |     |
| Bystander child entry into the crop (%AAOEL): | 1.1                                                                                                                                                                                                                                                                                                                                                                                                                                                                                                                                                                                                                                                                                                                                                                                                                                                                                                                                                                                                                                                                                                                                                                                                                                                                                                                                                                                                                                           |                                       |     |                                       |   |                                      |     |                                      |     |                                       |     |                                       |     |                                      |     |                                      |     |                                               |     |                                               |     |                                      |     |                                      |     |
| Bystander adult entry into the crop (%AAOEL): | 0.6                                                                                                                                                                                                                                                                                                                                                                                                                                                                                                                                                                                                                                                                                                                                                                                                                                                                                                                                                                                                                                                                                                                                                                                                                                                                                                                                                                                                                                           |                                       |     |                                       |   |                                      |     |                                      |     |                                       |     |                                       |     |                                      |     |                                      |     |                                               |     |                                               |     |                                      |     |                                      |     |
| Resident child all pathways (%AOEL):          | 3.7                                                                                                                                                                                                                                                                                                                                                                                                                                                                                                                                                                                                                                                                                                                                                                                                                                                                                                                                                                                                                                                                                                                                                                                                                                                                                                                                                                                                                                           |                                       |     |                                       |   |                                      |     |                                      |     |                                       |     |                                       |     |                                      |     |                                      |     |                                               |     |                                               |     |                                      |     |                                      |     |
| Resident adult all pathways (%AOEL):          | 1.7                                                                                                                                                                                                                                                                                                                                                                                                                                                                                                                                                                                                                                                                                                                                                                                                                                                                                                                                                                                                                                                                                                                                                                                                                                                                                                                                                                                                                                           |                                       |     |                                       |   |                                      |     |                                      |     |                                       |     |                                       |     |                                      |     |                                      |     |                                               |     |                                               |     |                                      |     |                                      |     |

**Assessment of Negligible Exposure for ornamentals<sup>4</sup>: Refer to Volume 1, section 2.6.14.2**

**Classification with regard to toxicological data (Regulation (EU) N° 283/2013, Annex Part A, Section 10)**

|                                                                                                                                                                                                |                                                                                                                  |
|------------------------------------------------------------------------------------------------------------------------------------------------------------------------------------------------|------------------------------------------------------------------------------------------------------------------|
| Substance :                                                                                                                                                                                    | Fludioxonil                                                                                                      |
| Harmonised classification according to Regulation (EC) No 1272/2008 and its Adaptations to Technical Process [Table 3.1 of Annex VI of Regulation (EC) No 1272/2008 as amended] <sup>5</sup> : | No current harmonised classification.<br>RAC opinion June 2017 <sup>6</sup> : No classification for human health |
| According to the peer review <sup>7</sup> , criteria for harmonised classification according to Regulation (EC) No 1272/2008 <sup>8</sup> may be met for:                                      | Repr 2 H361f                                                                                                     |

<sup>4</sup> An assessment of negligible exposure for these uses has not been included in this Conclusion since not part of the representative uses. A negligible exposure assessment for the representative uses is not available.

<sup>5</sup> Regulation (EC) No 1272/2008 of the European Parliament and of the Council of 16 December 2008 on classification, labelling and packaging of substances and mixtures, amending and repealing Directives 67/548/EEC and 1999/45/EC, and amending Regulation (EC) No 1907/2006. OJ L 353, 31.12.2008, 1-1355.

<sup>6</sup> ECHA (European Chemicals Agency), 2017. Committee for Risk Assessment (RAC) Opinion proposing harmonised classification and labelling at EU level of fludioxonil (ISO); 4-(2,2-difluoro-1,3-benzodioxol-4-yl)-1H-pyrrole-3-carbonitrile. CLH-O-0000001412-86-162/F. Adopted 9 June 2017. Available at [www.echa.europa.eu](http://www.echa.europa.eu) ATP14 ([Commission Delegated Regulation \(EU\) 2020/217 of 4 October 2019](https://eur-lex.europa.eu/eli/reg/2020/217/20201004))

<sup>7</sup> The RMS is invited to consider submitting a CLH dossier to ECHA in order to propose a modification of the existing Annex VI entry of the CLP Regulation for fludioxonil. This dossier could be targeted to one or more hazard classes only as based on new data which become available since the harmonised classification was agreed. EFSA recommends the RMS to send an updated CLH dossier to ECHA in order to propose a revision of the current Annex VI entry of the CLP Regulation.

<sup>8</sup> It should be noted that harmonised classification and labelling is formally proposed and decided in accordance with Regulation (EC) No 1272/2008.

## Residues in or on treated products food and feed

### Metabolism in plants (Regulation (EU) N° 283/2013, Annex Part A, points 6.2.1, 6.5.1, 6.6.1 and 6.7.1)

| Primary crops<br>(Plant groups covered)<br>OECD Guideline 501                                                                                                                                                                                                                                                                                             | Crop groups          | Crop(s)                       | Application(s)                                                      | DAT<br>(days)                                                              |
|-----------------------------------------------------------------------------------------------------------------------------------------------------------------------------------------------------------------------------------------------------------------------------------------------------------------------------------------------------------|----------------------|-------------------------------|---------------------------------------------------------------------|----------------------------------------------------------------------------|
|                                                                                                                                                                                                                                                                                                                                                           | Fruit crops          | Grapes                        | 3x500g a.s./ha (Foliar)                                             | 0, 14, 35                                                                  |
|                                                                                                                                                                                                                                                                                                                                                           |                      | Tomato                        | 3x 750 g a.s./ha(Foliar)                                            | 0, 40                                                                      |
|                                                                                                                                                                                                                                                                                                                                                           |                      | Peach                         | 3x280 g a.s./ha(Foliar)<br>3x2800 g a.s./ha<br>2100+6300 g a.s./ha  | 28<br>28<br>30, 114                                                        |
|                                                                                                                                                                                                                                                                                                                                                           | Root crops           | Potato                        | 2.5 g a.s./100kg seeds                                              | 0, 40, 71,<br>95                                                           |
|                                                                                                                                                                                                                                                                                                                                                           | Leafy crops          | Lettuce                       | 3x200 g a.s./ha (Foliar)<br>3x600g a.s./ha                          | 0, 6, 13                                                                   |
|                                                                                                                                                                                                                                                                                                                                                           |                      | Spring onion<br>(whole plant) | 557+683 g a.s./ha (Foliar)<br>2793+3376 g a.s./ha                   | 0, 7, 14, 28                                                               |
|                                                                                                                                                                                                                                                                                                                                                           | Cereals/grass crops  | Rice                          | 6.5 g a.s./100 kg seeds                                             | 0, 38, 76<br>and 152                                                       |
|                                                                                                                                                                                                                                                                                                                                                           |                      | Wheat                         | 3.9-7.4 g a.s./100kg seeds<br><br>Injection in stem<br>(supportive) | 48, 83, 106<br><br>21, 40, 69                                              |
|                                                                                                                                                                                                                                                                                                                                                           | Pulses/Oilseeds      | Cotton                        | 2.5 g a.s./100kg seeds<br>5 g a.s./100kg seeds                      | 186                                                                        |
|                                                                                                                                                                                                                                                                                                                                                           |                      | Soybean                       | 5 g a.s./100kg seeds                                                | 28, 38, 133                                                                |
| Miscellaneous                                                                                                                                                                                                                                                                                                                                             | -                    | -                             | -                                                                   |                                                                            |
| Pyrrole- <sup>14</sup> C labelling for all crops except for peaches and Spring onions (phenyl- <sup>14</sup> C labelling form).<br>Seed treatment: a low residue situation is expected.<br>Foliar application: no major difference observed between metabolic pathways in fruits and fruiting vegetables, leafy vegetables or root and tubers vegetables. |                      |                               |                                                                     |                                                                            |
| Rotational crops<br>(metabolic pattern)<br>OECD Guideline 502                                                                                                                                                                                                                                                                                             | Crop groups          | Crop(s)                       | PBI (days)                                                          | Comments                                                                   |
| Rotational crop and primary crop metabolism similar?                                                                                                                                                                                                                                                                                                      | Root/tuber crops     | Sugar beet                    | 320                                                                 | 4 different studies have been submitted, with different applications rates |
|                                                                                                                                                                                                                                                                                                                                                           |                      | Turnip, radish                | 30, 90, 210                                                         |                                                                            |
|                                                                                                                                                                                                                                                                                                                                                           | Leafy crops          | Lettuce                       | 90                                                                  |                                                                            |
|                                                                                                                                                                                                                                                                                                                                                           |                      | Mustard                       | 30, 90, 210                                                         |                                                                            |
|                                                                                                                                                                                                                                                                                                                                                           | Cereal (small grain) | Winter wheat                  | 140                                                                 |                                                                            |
|                                                                                                                                                                                                                                                                                                                                                           |                      | Spring wheat                  | 30, 90, 210                                                         |                                                                            |
| Maize                                                                                                                                                                                                                                                                                                                                                     |                      | 345                           |                                                                     |                                                                            |
| Other                                                                                                                                                                                                                                                                                                                                                     |                      |                               |                                                                     |                                                                            |
| Yes, but fludioxonil is extensively degraded.                                                                                                                                                                                                                                                                                                             |                      |                               |                                                                     |                                                                            |

|                                                                                                                                                                                         |                                                                                                                                                                                                                                                                                                                                                                                                                                                                                                                                                                                                                                                 |                                                        |
|-----------------------------------------------------------------------------------------------------------------------------------------------------------------------------------------|-------------------------------------------------------------------------------------------------------------------------------------------------------------------------------------------------------------------------------------------------------------------------------------------------------------------------------------------------------------------------------------------------------------------------------------------------------------------------------------------------------------------------------------------------------------------------------------------------------------------------------------------------|--------------------------------------------------------|
| <b>Processed commodities</b><br>(standard hydrolysis study)<br><b>OECD Guideline 507</b><br><br>Residue pattern in processed commodities similar to residue pattern in raw commodities? | <b>Conditions</b>                                                                                                                                                                                                                                                                                                                                                                                                                                                                                                                                                                                                                               | <b>[4-<sup>14</sup>C]-pyrrole-labelled fludioxonil</b> |
|                                                                                                                                                                                         | 20 min, 90°C, pH 4                                                                                                                                                                                                                                                                                                                                                                                                                                                                                                                                                                                                                              | No degradation of the parent fludioxonil was observed  |
|                                                                                                                                                                                         | 60 min, 100°C, pH 5                                                                                                                                                                                                                                                                                                                                                                                                                                                                                                                                                                                                                             |                                                        |
|                                                                                                                                                                                         | 20 min, 120°C, pH 6                                                                                                                                                                                                                                                                                                                                                                                                                                                                                                                                                                                                                             |                                                        |
| No degradation of parent compound was observed                                                                                                                                          |                                                                                                                                                                                                                                                                                                                                                                                                                                                                                                                                                                                                                                                 |                                                        |
| Plant residue definition for monitoring (RD-Mo)<br><b>OECD Guidance, series on pesticides No 31</b>                                                                                     | Primary crops: Fludioxonil - all categories of crops following foliar and seed treatment<br>Rotational crops: Fludioxonil (by default)                                                                                                                                                                                                                                                                                                                                                                                                                                                                                                          |                                                        |
| Plant residue definition for risk assessment (RD-RA)                                                                                                                                    | Primary crops: Sum of fludioxonil and its metabolites which can be oxidised to metabolite 2,2-difluoro-2H-1,3-benzodioxole-4-carboxylic acid (CGA192155), expressed as fludioxonil – provisional ( <b>see data gap (1)</b> )<br><b>Data gap (1):</b> complete datasets of residue trials compliant with the representative uses and analysing respectively fludioxonil alone, and fludioxonil and all its metabolites that can be oxidised to metabolite 2,2-difluoro-2H-1,3-benzodioxole-4-carboxylic acid (CGA192155), expressed as fludioxonil.<br>Rotational crops: Fludioxonil (by default) – Provisional (See <b>Data gap (2) below</b> ) |                                                        |
| Conversion factor (monitoring to risk assessment)                                                                                                                                       | Open (see data gap (1))                                                                                                                                                                                                                                                                                                                                                                                                                                                                                                                                                                                                                         |                                                        |

### Metabolism in livestock (Regulation (EU) N° 283/2013, Annex Part A, points 6.2.2, 6.2.3, 6.2.4, 6.2.5 6.7.1)

| <b>OECD Guideline 503 and SANCO/11187/2013 rev. 3 (fish)</b>                                         | <b>Animal</b>                                                                                                                                                           | <b>Dose</b><br>(mg/kg bw/d) | <b>Duration</b><br>(days) | <b>N rate/comment</b> |
|------------------------------------------------------------------------------------------------------|-------------------------------------------------------------------------------------------------------------------------------------------------------------------------|-----------------------------|---------------------------|-----------------------|
| <b>Animals covered</b>                                                                               | Laying hen                                                                                                                                                              | 6.3                         | 8                         | 1260N                 |
|                                                                                                      | Goat/Cow                                                                                                                                                                | 3.5                         | 4                         | 875N                  |
|                                                                                                      | Pig                                                                                                                                                                     | No study                    | -                         | -                     |
|                                                                                                      | Fish                                                                                                                                                                    | No study                    | -                         | -                     |
|                                                                                                      | Studies conducted with the pyrrole- <sup>14</sup> C labelled fludioxonil only                                                                                           |                             |                           |                       |
| Time needed to reach a plateau concentration in milk and eggs (days)                                 | Eggs: day 4 (2 animals out of 5; unclear for others)<br>Milk: not reached during metabolism study; identified at day 3 or 10 depending on the dose in the feeding study |                             |                           |                       |
| Animal residue definition for monitoring (RD-Mo)<br><b>OECD Guidance, series on pesticides No 31</b> | Sum of fludioxonil and its metabolites oxidised to metabolite 2,2-difluoro-2H-1,3-benzodioxole-4-carboxylic acid (CGA192155), expressed as fludioxonil                  |                             |                           |                       |
| Animal residue definition for risk assessment (RD-RA)                                                | Sum of fludioxonil and its metabolites oxidised to metabolite 2,2-difluoro-2H-1,3-benzodioxole-4-carboxylic acid (CGA192155), expressed as fludioxonil                  |                             |                           |                       |
| Conversion factor (monitoring to risk assessment)                                                    | Not necessary                                                                                                                                                           |                             |                           |                       |

|                                                 |                                                                                                                      |
|-------------------------------------------------|----------------------------------------------------------------------------------------------------------------------|
| Metabolism in rat and ruminant similar (Yes/No) | Yes                                                                                                                  |
| Fat soluble residues (Yes/No)<br>(FAO, 2009)    | Yes (Log Po/w > 4; preferential concentration in fat and egg yolk rather than in muscle and egg white, respectively) |

**Residues in succeeding crops (Regulation (EU) N° 283/2013, Annex Part A, point 6.6.2)**

|                                                                                                               |                                                                                                                                                                                                                                                                                                                                                                                                                                                                                                                                                                                                                                                                                                                                                                                                                                                                                                                                                                                                                                                      |
|---------------------------------------------------------------------------------------------------------------|------------------------------------------------------------------------------------------------------------------------------------------------------------------------------------------------------------------------------------------------------------------------------------------------------------------------------------------------------------------------------------------------------------------------------------------------------------------------------------------------------------------------------------------------------------------------------------------------------------------------------------------------------------------------------------------------------------------------------------------------------------------------------------------------------------------------------------------------------------------------------------------------------------------------------------------------------------------------------------------------------------------------------------------------------|
| <p><b>Confined rotational crop study</b><br/>(Quantitative aspect)<br/><a href="#">OECD Guideline 502</a></p> | <p>For field strawberries, a PECplateau of parent compound was determined at 0.137 mg fludioxonil/kg soil, which is equivalent to 411 g a.s./ha. For seed treatment, the sowing of treated seeds on a soil in which the plateau has been reached is deemed equivalent to an application on bare soil at a rate of 81.5 g a.s./ha.</p> <p>Individual metabolites of fludioxonil are unlikely to be present at levels above 0.01 mg/kg in commodities for human consumption produced by rotational crops planted following treatment with fludioxonil in accordance with the representative uses. For feed items, no individual compound is expected at levels above 0.05 mg/kg. No further data are required.</p>                                                                                                                                                                                                                                                                                                                                     |
| <p><b>Field rotational crop study</b><br/><a href="#">OECD Guideline 504</a></p>                              | <p>Uptake of the parent fludioxonil was studied in rotational lettuce, turnips and wheat in three US states (California, Florida, and New York). Fludioxonil was applied onto bare soil four times, with seven-day intervals, at a rate of 282 g a.s./ha per application (total application rate 1128 g a.s./ha). Planting or sowing was carried out 30, 90, 150 and 210 DAT. These results confirm that levels of fludioxonil above 0.01 mg/kg are not expected in rotational crops. However, no metabolites were analysed in this study. These studies can only be considered as supportive since these are not European residue trials.</p> <p><b>Data gap (2):</b> sufficient rotational crops field trials covering the Northern and Southern zones of Europe to determine the magnitude of CGA227731 residues in cereal forage, grain and straw at the different standard plant back intervals (PBIs), covering the maximum PECsoil for fludioxonil and supported by validated methods and acceptable storage stability data are required.</p> |

**Stability of residues (Regulation (EU) N° 283/2013, Annex Part A, point 6.1)**  
**OECD Guideline 506**

| Plant products (Category)                                                                                                                                                                        | Commodity        | T (°C) | Stability (Months)     |  |  |  |
|--------------------------------------------------------------------------------------------------------------------------------------------------------------------------------------------------|------------------|--------|------------------------|--|--|--|
|                                                                                                                                                                                                  |                  |        | Fludioxonil            |  |  |  |
| High water content                                                                                                                                                                               | Tomato           | -18    | 24                     |  |  |  |
|                                                                                                                                                                                                  | Apples           | -18    | 24                     |  |  |  |
|                                                                                                                                                                                                  | Fresh peas       | -18    | 24                     |  |  |  |
|                                                                                                                                                                                                  | Maize forage     | -18    | 24                     |  |  |  |
|                                                                                                                                                                                                  | Sweet corn ears  | -18    | 24                     |  |  |  |
| High oil content                                                                                                                                                                                 | Rapeseed         | -18    | No stability           |  |  |  |
|                                                                                                                                                                                                  | Corn oil         | -18    | 25                     |  |  |  |
| High protein content                                                                                                                                                                             | -                | -      | -                      |  |  |  |
| High starch content                                                                                                                                                                              | Cereal grain     | -18    | 24                     |  |  |  |
|                                                                                                                                                                                                  | Maize grain      | -18    | 24                     |  |  |  |
|                                                                                                                                                                                                  | Potato tubers    | -18    | 24                     |  |  |  |
| High acid content                                                                                                                                                                                | Grapes           | -18    | 28.5                   |  |  |  |
| No group                                                                                                                                                                                         | Cereal straw     | -18    | 24                     |  |  |  |
|                                                                                                                                                                                                  | Corn meal        | -18    | 27                     |  |  |  |
|                                                                                                                                                                                                  | Sorghum hay      | -18    | 24                     |  |  |  |
|                                                                                                                                                                                                  | Sorghum flour    | -18    | 27                     |  |  |  |
|                                                                                                                                                                                                  | Potato flakes    | -18    | 27                     |  |  |  |
| <b>Data gap:</b> an additional storage stability study on a crop representative of the high acid content commodities is required to comply with the current OECD recommendations (OECD TGL 506). |                  |        |                        |  |  |  |
| Animal                                                                                                                                                                                           | Animal commodity | T (°C) | Stability (Month/Year) |  |  |  |
|                                                                                                                                                                                                  |                  |        | Fludioxonil *          |  |  |  |
| Beef                                                                                                                                                                                             | Muscle           | -20    | 4                      |  |  |  |
|                                                                                                                                                                                                  | Liver            | -20    | 19                     |  |  |  |
|                                                                                                                                                                                                  | Kidney           | -20    | 19                     |  |  |  |
| Cattle                                                                                                                                                                                           | Milk             | -20    | 3                      |  |  |  |
| Poultry                                                                                                                                                                                          | Egg              | -20    | 19                     |  |  |  |
| * Samples spiked with fludioxonil, analysed with a method which convert fludioxonil and its oxidizable metabolites into CGA 192155                                                               |                  |        |                        |  |  |  |

**Summary of residues data from the supervised residue trials (Regulation (EU) N° 283/2013, Annex Part A, point 6.3) OECD Guideline 509, OECD Guidance, series on pesticides No 66 and OECD MRL calculator**

The residues data given below is only considering Fludioxonil. See above for data gap (1) regarding complete datasets of residue trials compliant with the representative uses and analysing respectively fludioxonil alone, and fludioxonil and all its metabolites that can be oxidised to metabolite 2,2-difluoro-2*H*-1,3-benzodioxole-4-carboxylic acid (CGA192155), expressed as fludioxonil

| Crop                                 | Region/<br>Indoor<br>(a) | Residue levels (mg/kg) observed in the supervised<br>residue trials relevant to the supported GAPs<br>(b) | Recommendations/comments<br>(OECD calculations)                                                                                                                                                                                                                                                                                                                                                                                                         | MRL<br>proposals<br>(mg/kg) | HR<br>(mg/kg)<br>(c) | STMR<br>(mg/kg)<br>(d) |
|--------------------------------------|--------------------------|-----------------------------------------------------------------------------------------------------------|---------------------------------------------------------------------------------------------------------------------------------------------------------------------------------------------------------------------------------------------------------------------------------------------------------------------------------------------------------------------------------------------------------------------------------------------------------|-----------------------------|----------------------|------------------------|
| <b>Representative uses</b>           |                          |                                                                                                           |                                                                                                                                                                                                                                                                                                                                                                                                                                                         |                             |                      |                        |
| Pome fruits<br>(apples and<br>pears) | NEU<br>(8)               | Apple: 2x0.18, 2x0.23, 2x0.25, 0.43, 0.54                                                                 | Only GAP compliant residue trials with<br>two applications were considered.                                                                                                                                                                                                                                                                                                                                                                             | 0.9                         | 0.54                 | 0.24                   |
|                                      | SEU<br>(8)               | Apple: 0.05, 0.08, 0.11, 0.17, 0.19, 0.25, 0.37, 0.41                                                     |                                                                                                                                                                                                                                                                                                                                                                                                                                                         | 0.8                         | 0.41                 | 0.18                   |
|                                      | NEU+SEU<br>(16)          | Apple: 0.05, 0.08, 0.11, 0.17, 2x0.18, 0.19, 2x0.23,<br>3x0.25, 0.37, 0.43, 0.54                          | NEU and SEU datasets were not identified<br>as different by a Mann and Whitney test<br>and therefore pooled.                                                                                                                                                                                                                                                                                                                                            | 0.9                         | 0.54                 | 0.24                   |
| Table grapes<br>(PHI:7 days)         | SEU<br>(8)               | 0.16, 0.22, 0.27, 0.30, 0.34, 0.82, 1.80, 1.93                                                            | For table grapes results from grapes<br>without stem are considered                                                                                                                                                                                                                                                                                                                                                                                     | 4                           | 1.93                 | 0.32                   |
| Wine grapes<br>(PHI:21 days)         | SEU<br>(8)               | 0.15, 0.20, 0.26, 0.27, 0.38, 0.49, 1.95, 2.65                                                            |                                                                                                                                                                                                                                                                                                                                                                                                                                                         | 5                           | 2.65                 | 0.32                   |
| Strawberries                         | NEU                      |                                                                                                           | Presented residue trials were not GAP-<br>compliant with three instead of two<br>applications.<br>See the data gap (1) for complete datasets<br>of residue trials compliant with the<br>representative uses and analysing<br>respectively fludioxonil alone, and<br>fludioxonil and all its metabolites that can<br>be oxidised to metabolite 2,2-difluoro-2 <i>H</i> -<br>1,3-benzodioxole-4-carboxylic acid<br>(CGA192155), expressed as fludioxonil. |                             |                      |                        |
|                                      | SEU                      |                                                                                                           |                                                                                                                                                                                                                                                                                                                                                                                                                                                         |                             |                      |                        |
|                                      | Indoor                   |                                                                                                           |                                                                                                                                                                                                                                                                                                                                                                                                                                                         |                             |                      |                        |



| Crop                                                                                                                                                                                                                                                                                                                                                                                                         | Region/<br>Indoor<br>(a) | Residue levels (mg/kg) observed in the supervised<br>residue trials relevant to the supported GAPs<br>(b) | Recommendations/comments<br>(OECD calculations) | MRL<br>proposals<br>(mg/kg) | HR<br>(mg/kg)<br>(c) | STMR<br>(mg/kg)<br>(d) |
|--------------------------------------------------------------------------------------------------------------------------------------------------------------------------------------------------------------------------------------------------------------------------------------------------------------------------------------------------------------------------------------------------------------|--------------------------|-----------------------------------------------------------------------------------------------------------|-------------------------------------------------|-----------------------------|----------------------|------------------------|
| Wheat grain<br>→ Oats grain                                                                                                                                                                                                                                                                                                                                                                                  | NEU<br>(21)              | Wheat: 13x <0.02, 8x <0.04                                                                                |                                                 | 0.07                        | 0.04                 | 0.02                   |
|                                                                                                                                                                                                                                                                                                                                                                                                              | SEU<br>(9)               | Wheat: 9x <0.02                                                                                           |                                                 | 0.02*                       | 0.02                 | 0.02                   |
| Wheat straw<br>→ Oats straw                                                                                                                                                                                                                                                                                                                                                                                  | NEU<br>(21)              | Wheat: 4x <0.02, 10x <0.04, 7x <0.05                                                                      |                                                 | -                           | 0.05                 | 0.04                   |
|                                                                                                                                                                                                                                                                                                                                                                                                              | SEU<br>(9)               | Wheat: 2x <0.02, <0.04, 6x <0.05                                                                          |                                                 | -                           | 0.05                 | 0.05                   |
| <b>Summary of the data on formulation equivalence <a href="#">OECD Guideline 509</a></b>                                                                                                                                                                                                                                                                                                                     |                          |                                                                                                           |                                                 |                             |                      |                        |
| Crop                                                                                                                                                                                                                                                                                                                                                                                                         | Region                   | Residue data (mg/kg)                                                                                      | Recommendations/comments                        |                             |                      |                        |
| Not necessary                                                                                                                                                                                                                                                                                                                                                                                                |                          |                                                                                                           |                                                 |                             |                      |                        |
| <b>Summary of data on residues in pollen and bee products (Regulation (EU) No 283/2013, Annex Part A, point 6.10.1)</b>                                                                                                                                                                                                                                                                                      |                          |                                                                                                           |                                                 |                             |                      |                        |
| Product(s)                                                                                                                                                                                                                                                                                                                                                                                                   | Region                   | Residue data (mg/kg)                                                                                      | Recommendations/comments                        |                             |                      |                        |
| Not available<br><b>Data gap:</b> additional residue trials on a crop representative of a worst-case scenario with respect to potential residues in honey and conducted at an appropriate dose rate of application should be provided; the residue situation in the rotational crops should also be considered in the overall assessment to determine the residues of fludioxonil in pollen and bee products |                          |                                                                                                           |                                                 |                             |                      |                        |

- (a): **NEU** or **SEU** for northern or southern **outdoor** trials in EU member states (**N+SEU** if both zones), **Indoor** for glasshouse/protected crops, **Country** if non-EU location.
- (b): Residue levels in trials conducted according to GAP reported in ascending order (e.g. 3x <0.01, 0.01, 6x 0.02, 0.04, 0.08, 3x 0.10, 2x 0.15, 0.17). When residue definition for monitoring and risk assessment differs, use **Mo/RA** to differentiate data expressed according to the residue definition for **Monitoring and Risk Assessment**.
- (c): **HR**: Highest residue. When residue definition for monitoring and risk assessment differs, HR according to residue definition for monitoring reported in brackets (HR<sub>M0</sub>).
- (d): **STMR**: Supervised Trials Median Residue. When residue definition for monitoring and risk assessment differs, STMR according to definition for monitoring reported in brackets (STMR<sub>M0</sub>).

**Inputs for animal burden calculations** – Provisional (see data gaps (1) and (2))

| Feed commodity              | Median dietary burden |                           | Maximum dietary burden |         |
|-----------------------------|-----------------------|---------------------------|------------------------|---------|
|                             | (mg/kg)               | Comment                   | (mg/kg)                | Comment |
| <b>Representative uses</b>  |                       |                           |                        |         |
| Oat, Triticale, Wheat straw | 0.05                  | STMR                      | 0.05                   | HR      |
| Oat, Triticale, Wheat grain | 0.02                  | STMR                      |                        |         |
| Apple pomace, wet           | 0.32                  | STMR-P (PF 1.4)           |                        |         |
| Distiller's grain dried     | 0.07                  | STMR-P (default PF = 3.3) |                        |         |
| Wheat gluten, meal          | 0.04                  | STMR-P (default PF = 1.8) |                        |         |
| Wheat, milled by-pdts       | 0.14                  | STMR-P (default PF = 7)   |                        |         |

**Residues from livestock feeding studies (Regulation (EU) N° 283/2013, Annex Part A, points 6.4.1, 6.4.2, 6.4.3 and 6.4.4) - Provisional (see data gaps (1) and (2) OECD Guideline 505 and OECD Guidance, series on pesticides No 73**

| MRL calculations                                                                       | Ruminant                                                              |                             |                                   |                           | Pig/Swine                         |                        | Poultry                           |                       | Fish                              |                      |
|----------------------------------------------------------------------------------------|-----------------------------------------------------------------------|-----------------------------|-----------------------------------|---------------------------|-----------------------------------|------------------------|-----------------------------------|-----------------------|-----------------------------------|----------------------|
|                                                                                        | <b>Highest expected intake</b><br>(mg/kg bw/d)<br>(mg/kg DM for fish) | Beef cattle                 | 0.004                             | Ram/Ewe                   | 0.004                             | Breeding               | 0.002                             | Broiler               | 0.003                             | Carp                 |
|                                                                                        | Dairy cattle                                                          | 0.004                       | Lamb                              | 0.005                     | Finishing                         | 0.003                  | Layer                             | 0.004                 | Trout                             | 0.010                |
|                                                                                        |                                                                       |                             |                                   |                           |                                   |                        | Turkey                            | 0.003                 | Fish intake >0.1 mg/kg DM         |                      |
| Intake >0.004 mg/kg bw                                                                 | Yes                                                                   |                             | Yes                               |                           | No                                |                        | No                                |                       | No                                |                      |
| Feeding study submitted                                                                | Yes (cows)                                                            |                             | No (extrapolated from cows)       |                           | No (not necessary)                |                        | No (not necessary)                |                       | No (not necessary)                |                      |
| <b>Representative feeding level</b> (mg/kg bw/d, mg/kg DM for fish) and <b>N rates</b> | Level<br>0.8/<br>0.02 (milk)                                          | Beef: 120 N<br>Dairy: 3.3 N | Level<br>0.8/<br>0.02 (milk)      | Lamb: 126 N<br>Ewe: 162 N | Level                             | N rate<br>Breed/Finish | Level                             | B or T: N<br>Layer: N | Level                             | N rate<br>Carp/Trout |
|                                                                                        | Estimated HR <sup>(a)</sup> at 1N                                     | <b>MRL proposals</b>        | Estimated HR <sup>(a)</sup> at 1N | <b>MRL proposals</b>      | Estimated HR <sup>(a)</sup> at 1N | <b>MRL proposals</b>   | Estimated HR <sup>(a)</sup> at 1N | <b>MRL proposals</b>  | Estimated HR <sup>(a)</sup> at 1N | <b>MRL proposals</b> |
| Muscle                                                                                 | 0.01                                                                  | 0.01*                       | 0.01                              | 0.01*                     |                                   |                        |                                   |                       | -                                 | -                    |
| Fat                                                                                    | 0.01                                                                  | 0.01*                       | 0.01                              | 0.01*                     |                                   |                        |                                   |                       | -                                 | -                    |
| Meat <sup>(b)</sup>                                                                    | 0.01                                                                  |                             | 0.01                              |                           |                                   |                        |                                   |                       |                                   |                      |
| Liver                                                                                  | 0.01                                                                  | 0.01*                       | 0.01                              | 0.01*                     |                                   |                        |                                   |                       |                                   |                      |
| Kidney                                                                                 | 0.01                                                                  | 0.01*                       | 0.01                              | 0.01*                     |                                   |                        |                                   |                       |                                   |                      |
| Milk <sup>(a)</sup>                                                                    | 0.01                                                                  | 0.01*                       | 0.01                              | 0.01*                     |                                   |                        |                                   |                       |                                   |                      |
| Eggs                                                                                   |                                                                       |                             |                                   |                           |                                   |                        |                                   |                       |                                   |                      |
| Method of calculation <sup>(c)</sup>                                                   | Tf                                                                    |                             | Tf                                |                           |                                   |                        |                                   |                       |                                   |                      |

(a): Estimated HR calculated at 1N level (**estimated mean level for milk**).

(b): HR in meat calculated for mammalian on the basis of 20% fat + 80% muscle and 10% fat + 90% muscle for poultry

(c): The OECD guidance document on residues in livestock (series on pesticides 73) recommends three different approaches to derive MRLs for animal products; by applying a transfer factor (Tf), by intrapolation (It) or by linear regression (Ln). Fill in method(s) considered to derive the MRL proposals.

| STMR calculations | Ruminant                                      |             |        |         | Pig/Swine |          | Poultry |         | Fish  |       |
|-------------------|-----------------------------------------------|-------------|--------|---------|-----------|----------|---------|---------|-------|-------|
|                   | <b>Median expected intake</b><br>(mg/kg bw/d) | Beef cattle | 0.0044 | Ram/Ewe | 0.0037    | Breeding | 0.002   | Broiler | 0.003 | Carp  |
|                   | Dairy cattle                                  | 0.0039      | Lamb   | 0.0049  | Finishing | 0.003    | Layer   | 0.004   | Trout | 0.010 |

| STMR calculations<br>(mg/kg DM for fish)                                          | Ruminant                          |                                           |                                   |                                           | Pig/Swine                         |                                           | Poultry                           |                                           | Fish                              |                                           |
|-----------------------------------------------------------------------------------|-----------------------------------|-------------------------------------------|-----------------------------------|-------------------------------------------|-----------------------------------|-------------------------------------------|-----------------------------------|-------------------------------------------|-----------------------------------|-------------------------------------------|
|                                                                                   | Level<br>0.8/<br>0.02 (milk)      | Beef: 120N<br>Dairy: 145 N                | Level<br>0.8/<br>0.02 (milk)      | Lamb: 126 N<br>Ewe: 162 N                 | Level                             | N rate<br>Breed/Finish                    | Level                             | Turkey<br>0.003<br>B or T: N<br>Layer: N  | Level                             | N rate<br>Carp/Trout                      |
| Representative feeding<br>level (mg/kg bw/d,<br>mg/kg DM for fish) and<br>N rates | Mean level<br>in feeding<br>level | Estimated<br>STMR <sup>(b)</sup><br>at 1N | Mean level<br>in feeding<br>level | Estimated<br>STMR <sup>(b)</sup><br>at 1N | Mean level<br>in feeding<br>level | Estimated<br>STMR <sup>(b)</sup><br>at 1N | Mean level<br>in feeding<br>level | Estimated<br>STMR <sup>(b)</sup><br>at 1N | Mean level<br>in feeding<br>level | Estimated<br>STMR <sup>(b)</sup><br>at 1N |
| Muscle                                                                            | 0.01                              | 0.01                                      | 0.01                              | 0.01                                      |                                   |                                           |                                   |                                           |                                   |                                           |
| Fat                                                                               | 0.01                              | 0.01                                      | 0.01                              | 0.01                                      |                                   |                                           |                                   |                                           |                                   |                                           |
| Meat <sup>(a)</sup>                                                               | 0.01                              | 0.01                                      | 0.01                              | 0.01                                      |                                   |                                           |                                   |                                           |                                   |                                           |
| Liver                                                                             | 0.07                              | 0.01                                      | 0.07                              | 0.01                                      |                                   |                                           |                                   |                                           |                                   |                                           |
| Kidney                                                                            | 0.08                              | 0.01                                      | 0.08                              | 0.01                                      |                                   |                                           |                                   |                                           |                                   |                                           |
| Milk                                                                              | 0.01                              | 0.01                                      | 0.01                              | 0.01                                      |                                   |                                           |                                   |                                           |                                   |                                           |
| Eggs                                                                              |                                   |                                           |                                   |                                           |                                   |                                           |                                   |                                           |                                   |                                           |
| Method of calculation <sup>(c)</sup>                                              | Tf                                |                                           | Tf                                |                                           |                                   |                                           |                                   |                                           |                                   |                                           |

<sup>(a)</sup>: STMR in meat calculated for mammalian on the basis of 20% fat + 80% muscle and 10% fat + 90% muscle for poultry

<sup>(b)</sup>: When the mean level is set at the LOQ, the STMR is set at the LOQ.

<sup>(c)</sup>: The OECD guidance document on residues in livestock (series on pesticide 73) recommends three different approaches to derive MRLs for animal products; by applying a transfer factor (Tf), by interpolation (It) or by linear regression (Ln). Fill in method(s) considered to derive the MRL proposals.

## Conversion Factors (CF) for monitoring to risk assessment

### Plant products

Open (see data gap (1))

Processing factors (Regulation (EU) N° 283/2013, Annex Part A, points 6.5.2 and 6.5.3)

[OECD Guideline 508 and OECD Guidance, series on testing and assessment No 96](#)

| Crop (RAC)/Edible part or Crop (RAC)/Processed product | Number of studies <sup>(a)</sup> | Processing Factor (PF)                                                                                                                              |                      | Conversion Factor (CF <sub>P</sub> ) for RA <sup>(b)</sup> |
|--------------------------------------------------------|----------------------------------|-----------------------------------------------------------------------------------------------------------------------------------------------------|----------------------|------------------------------------------------------------|
|                                                        |                                  | Individual values                                                                                                                                   | Median PF            |                                                            |
| <b>Representative uses</b>                             |                                  |                                                                                                                                                     |                      |                                                            |
| <b>Grapes</b>                                          |                                  |                                                                                                                                                     |                      |                                                            |
| <i>Must</i>                                            | 14                               | 0.10, 0.42, 0.32, 0.02, 1.12, 0.27, 1.25, 0.40, 0.28, 0.53, 0.76, 0.28, 0.98, 1.11, 1.86, 0.98, 1.02, 1.14, 0.68, 0.50, 1.52, 1.85, 1.03            | 0.76                 | -                                                          |
| <i>Juice</i>                                           | 12                               | 0.68, 0.95, 0.74, 0.80, 0.86, 0.79, 0.93, 0.67, 0.83, 0.73, 1.05, 1.02                                                                              | 0.82                 | -                                                          |
| <i>Pasteurised juice</i>                               | 2                                | 0.05, 0.07, 0.13, 0.09                                                                                                                              | 0.08                 | -                                                          |
| <i>Young wine</i>                                      | 12                               | 0.21, 0.04, 0.04, 0.08, 0.18, 0.76, 0.06, 0.33, 0.11, 0.17, 0.21, 0.98                                                                              | 0.18                 | -                                                          |
| <i>Red wine</i>                                        | 2                                | 0.03, 0.09, 0.22, 0.07, 0.10, 0.21, 0.16                                                                                                            | 0.10                 | -                                                          |
| <i>White wine</i>                                      | 2                                | 0.01, 0.03, 0.03, 0.03, 0.04, 0.04, 0.11, 0.21, 0.24, 0.19, 0.16, 0.19, 0.41                                                                        | 0.11                 | -                                                          |
| <i>Raisins</i>                                         | 14                               | Sun-dried: 0.56, 0.84, 0.63, 0.67, 1.04, 1.18<br>Industrial (sulfur gas + oven): 1.69, 1.25, 1.10, 1.13, 1.21, 1.07<br>Oven: 0.93, 2.19, 0.60, 0.55 | 0.84<br>1.12<br>0.58 | -                                                          |
| <i>Wet pomace</i>                                      | 2                                | 1.88, 1.36, 5.02, 6.52, 3.93, 8.24, 1.85, 2.83, 5.23, 3.64, 7.09, 6.76                                                                              | 4.48                 | -                                                          |
| <i>Dry pomace</i>                                      | 2                                | 4.69, 5.03, 11.87, 10.73, 11.20, 13.41, 3.98, 6.97, 11.40, 9.18, 20.97, 21.79                                                                       | 10.97                | -                                                          |
| <i>Grape seed oil</i>                                  | 2                                | 8.28, 10.38, 18.66, 18.18                                                                                                                           | 14.28                | -                                                          |
| <b>Apple</b>                                           |                                  |                                                                                                                                                     |                      |                                                            |
| <i>Washed fruit</i>                                    | 1                                | 0.84                                                                                                                                                | -                    | -                                                          |
| <i>Washing water</i>                                   | 1                                | 0.48                                                                                                                                                | -                    | -                                                          |
| <i>Wet pomace</i>                                      | 1                                | 0.93, 1.36, 1.52                                                                                                                                    | 1.36                 | -                                                          |

**Processing factors (Regulation (EU) N° 283/2013, Annex Part A, points 6.5.2 and 6.5.3)**

**OECD Guideline 508 and OECD Guidance, series on testing and assessment No 96**

| Crop (RAC)/Edible part or Crop (RAC)/Processed product | Number of studies <sup>(a)</sup> | Processing Factor (PF) |           | Conversion Factor (CF <sub>P</sub> ) for RA <sup>(b)</sup> |
|--------------------------------------------------------|----------------------------------|------------------------|-----------|------------------------------------------------------------|
|                                                        |                                  | Individual values      | Median PF |                                                            |
| <i>Dry pomace</i>                                      | 2                                | 3.05, 4.84, 5.32       | 4.84      | -                                                          |
| <i>Pasteurised juice</i>                               | 2                                | 0.02, 0.03, 0.08       | 0.03      | -                                                          |
| <i>Waste</i>                                           | 1                                | 1.48                   | -         | -                                                          |
| <i>Sauce</i>                                           | 2                                | 0.02, 0.03, 0.12       | 0.03      | -                                                          |
| <b>Strawberry</b>                                      |                                  |                        |           |                                                            |
| <i>Washed berries</i>                                  | 3                                | 0.86, 0.45, 0.33       | 0.45      | -                                                          |
| <i>Preserved strawberries</i>                          | 3                                | 0.79, 0.55, 0.37       | 0.55      | -                                                          |
| <i>Jam</i>                                             | 3                                | 0.50, 0.22, 0.21       | 0.22      | -                                                          |
| <i>Juice</i>                                           | 1                                | 0.11                   | -         | -                                                          |

<sup>(a)</sup>: Studies with residues in the RAC at or close to the LOQ should be disregarded (unless concentration)

<sup>(b)</sup>: When the residue definition for risk assessment differs from the residue definition for monitoring

**Consumer risk assessment (Regulation (EU) N° 283/2013, Annex Part A, point 6.9) – Provisional (see data gaps (1) and (2))**

**Representative uses only.**

**ADI**

TMDI according to EFSA PRIMo rev.3.1

TMDI according to EFSA PRIMo rev.2A

NTMDI, according to (to be specified)

IEDI (% ADI), according to EFSA PRIMo rev.3.1

NEDI (% ADI), according to (to be specified)

Factors included in the calculations

**ARfD**

IESTI (% ARfD), according to EFSA PRIMo rev.3.1

IESTI (% ARfD), according to EFSA PRIMo rev.2A

NESTI (% ARfD), according to (to be specified)

Factors included in IESTI and NESTI

|                                                                    |
|--------------------------------------------------------------------|
| 0.37 mg/kg bw per day                                              |
| Highest TMDI: 6% ADI (NL toddler)                                  |
| Highest TMDI: 5.3% ADI (DE child)                                  |
| Not conducted as TMDI does not lead to an exposure above 100 % ADI |
| Not conducted as TMDI does not lead to an exposure above 100 % ADI |
| Not conducted as TMDI does not lead to an exposure above 100 % ADI |
| Open (see data gap (1))                                            |
| 1 mg/kg bw                                                         |
| Highest IESTI: 27% ARfD (Tables grapes)                            |
| Second highest IESTI: 7% ARfD (Pears)                              |
| Highest IESTI: 24% ARfD (Tables grapes)                            |
| Not conducted                                                      |
| Open (see data gap (1))                                            |

**Additional contribution to the consumer intakes through drinking water resulting from groundwater metabolite(s) expected to be present above 0.75 µg/L**

Metabolite(s)

CGA339833

|                                                                               |                                                                                                                 |
|-------------------------------------------------------------------------------|-----------------------------------------------------------------------------------------------------------------|
| ADI (mg/kg bw per day)                                                        | 0.29                                                                                                            |
| Intake of groundwater metabolites (% ADI)<br><b>WHO Guideline (WHO, 2017)</b> | Adult (60 kg bw, 2 L): 0.05 % ADI<br>Child (10 kg bw, 1 L): 0.14 % ADI<br>Infant (5 kg bw, 0.75 L): 0.21 % ADI  |
| Metabolite(s)                                                                 | CGA192155                                                                                                       |
| ADI (mg/kg bw per day)                                                        | 0.37                                                                                                            |
| Intake of groundwater metabolites (% ADI)<br><b>WHO Guideline (WHO, 2009)</b> | Adult (60 kg bw, 2 L): 0.003% ADI<br>Child (10 kg bw, 1 L): 0.01 % ADI<br>Infant ( 5 kg bw, 0.75 L): 0.01 % ADI |
| Metabolite(s)                                                                 | Unidentified metabolites MF2 and D9                                                                             |
| ADI (mg/kg bw per day)                                                        | open                                                                                                            |
| Intake of groundwater metabolites (% ADI)<br>WHO Guideline (WHO, 2009)        | Adult (60 kg bw, 2 L): open<br>Child (10 kg bw, 1 L): open<br>Infant ( 5 kg bw, 0.75 L): open                   |

**Proposed MRLs (Regulation (EU) No 283/2013, Annex Part A, points 6.7.2 and 6.7.3)**

| Code <sup>(a)</sup>        | Commodity/Group | MRL/Import tolerance <sup>(b)</sup> (mg/kg) and Comments |                                         |
|----------------------------|-----------------|----------------------------------------------------------|-----------------------------------------|
| <b>Plant commodities</b>   |                 |                                                          |                                         |
| <b>Representative uses</b> |                 |                                                          |                                         |
| 130010                     | Apples          | 0.9                                                      | Provisional (see data gaps (1) and (2)) |
| 130020                     | Pears           | 0.9                                                      |                                         |
| 151010                     | Table grapes    | 4                                                        |                                         |
| 151020                     | Wine grapes     | 5                                                        |                                         |
| 152000                     | Strawberry      | open                                                     |                                         |
| 500050                     | Oats            | 0.07                                                     |                                         |
| 500090                     | Wheat           | 0.07                                                     |                                         |
| <b>MRL application</b>     |                 |                                                          |                                         |
| 152000                     | Strawberry      | open                                                     | Provisional (see data gaps (1) and (2)) |
| <b>Animal commodities</b>  |                 |                                                          |                                         |
| 1011000                    | Swine           | 0.01*                                                    | Provisional (see data gaps (1) and (2)) |
| 1012000                    | Bovine          | 0.01*                                                    |                                         |
| 1013000                    | Sheep           | 0.01*                                                    |                                         |
| 1014000                    | Goat            | 0.01*                                                    |                                         |
| 1020000                    | Milk            | 0.01*                                                    |                                         |

(a): Commodity code number, as listed in Annex I of Regulation (EC) No 396/2005

(b): MRLs proposed at the LOQ, should be annotated by an asterisk (\*) after the figure.

## Environmental fate and behaviour

### Route of degradation (aerobic) in soil (Regulation (EU) N° 283/2013, Annex Part A, point 7.1.1.1)

|                                                                                                  |                                                                                                                                                                                                      |
|--------------------------------------------------------------------------------------------------|------------------------------------------------------------------------------------------------------------------------------------------------------------------------------------------------------|
| Mineralisation after 100 days                                                                    | 28.36 % after 364 d, [ <sup>14</sup> C-pyrole]-label (n <sup>9</sup> =12)<br>44.93 % after 363 d, [ <sup>14</sup> C-phenyl]-label (n=4)                                                              |
| Non-extractable residues after 100 days                                                          | 28.60 % after 362 d, [ <sup>14</sup> C-pyrole]-label (n=12)<br>26.50 % after 363 d, [ <sup>14</sup> C-phenyl]-label (n=4)                                                                            |
| Metabolites requiring further consideration - name and/or code, % of applied (range and maximum) | No major metabolite observed<br>Minor non-transient metabolites<br><i>unknown metabolite: Data gap</i><br>MF2 - 7.7% AR at 61 d (n=1)<br>Sterile conditions: 90.1 % as fludioxonil after 90 d (n= 1) |

### Route of degradation (anaerobic) in soil (Regulation (EU) N° 283/2013, Annex Part A, point 7.1.1.2)

|                                                                                                                             |                                                                                                                                                                        |
|-----------------------------------------------------------------------------------------------------------------------------|------------------------------------------------------------------------------------------------------------------------------------------------------------------------|
| Mineralisation after 100 days                                                                                               | 2.9 % after 62 d of anaerobic conditions, [ <sup>14</sup> C-pyrole]-label (n= 2)<br>1.0 % after 362 d of anaerobic conditions, [ <sup>14</sup> C-phenyl]-label (n= 1)  |
| Non-extractable residues after 100 days                                                                                     | 11.9 % after 62 d of anaerobic conditions, [ <sup>14</sup> C-pyrole]-label (n= 2)<br>8.3 % after 272 d of anaerobic conditions, [ <sup>14</sup> C-phenyl]-label (n= 1) |
| Metabolites that may require further consideration for risk assessment - name and/or code, % of applied (range and maximum) | No major nor minor non-transient metabolites observed.                                                                                                                 |

### Route of degradation (photolysis) on soil (Regulation (EU) N° 283/2013, Annex Part A, point 7.1.1.3)

|                                                                                                                             |                                                                                                                                                                                                                                                                                                                                                                                                                                                                                                                                                                                                                                  |
|-----------------------------------------------------------------------------------------------------------------------------|----------------------------------------------------------------------------------------------------------------------------------------------------------------------------------------------------------------------------------------------------------------------------------------------------------------------------------------------------------------------------------------------------------------------------------------------------------------------------------------------------------------------------------------------------------------------------------------------------------------------------------|
| Mineralisation at study end                                                                                                 | 9.1 % after 44 eq. sunlight d, [ <sup>14</sup> C-pyrole]-label (n= 2)<br>7.8 % after 44 eq. sunlight d, [ <sup>14</sup> C-phenyl]-label (n= 3)                                                                                                                                                                                                                                                                                                                                                                                                                                                                                   |
| Non-extractable residues at study end                                                                                       | 20.3 % after 32 eq. sunlight d, [ <sup>14</sup> C-pyrole]-label (n= 2)<br>29.1 % after 32 eq. sunlight d, [ <sup>14</sup> C-phenyl]-label (n= 3)                                                                                                                                                                                                                                                                                                                                                                                                                                                                                 |
| Metabolites that may require further consideration for risk assessment - name and/or code, % of applied (range and maximum) | <i>Met CGA265378</i> – 11 % after 10 days (repeat test) / 10.1 % after 19 eq. sunlight d (n= 4) [ <sup>14</sup> C-pyrole] & [ <sup>14</sup> C-phenyl] labels<br><i>Met CGA192155</i> - 26.95 % at 32 eq. sunlight (n= 3) [ <sup>14</sup> C-pyrole] & [ <sup>14</sup> C-phenyl] labels<br><i>Met CGA339833</i> - 13.35 % at 19 eq. sunlight (n= 4) [ <sup>14</sup> C-pyrole] & [ <sup>14</sup> C-phenyl] labels<br><i>Met SYN545245</i> - 29.4 % at 19 eq. sunlight (n= 1) [ <sup>14</sup> C-phenyl] labels<br>Other unidentified compounds:<br><i>Met D9</i> – 7.3 % (n= 1) at 19 eq. sunlight d [ <sup>14</sup> C-pyrole] label |

### Rate of degradation in soil (aerobic) laboratory studies active substance (Regulation (EU) N° 283/2013, Annex Part A, point 7.1.2.1.1 and Regulation (EU) N° 284/2013, Annex Part A, point 9.1.1.1)

| Parent<br>Soil type                  | Dark aerobic conditions |                                                                               |                                        |                                                                                    |                          |                                                                           |
|--------------------------------------|-------------------------|-------------------------------------------------------------------------------|----------------------------------------|------------------------------------------------------------------------------------|--------------------------|---------------------------------------------------------------------------|
|                                      | pH <sup>a)</sup>        | t. °C / % MWHC                                                                | DT <sub>50</sub> /DT <sub>90</sub> (d) | DT <sub>50</sub> (d)<br>20 °C<br>pF2/10kPa <sup>b)</sup><br>Normalized<br>endpoint | St.<br>(x <sup>2</sup> ) | Method of<br>calculation                                                  |
| Sandy loam<br>Abildt (1991)          | 5.4                     | 20 °C - 30% FC, 2.0 ppm<br>20 °C - 60% FC, 0.2 ppm<br>20 °C - 60% FC, 2.0 ppm | 457 / 1950<br>466 / 2200<br>404 / 1650 | 202.8<br>315.4<br>293.7                                                            | 265.8 <sup>c)</sup>      | 2.83/5.94<br>1.16/6.36<br>1.39/4.77<br>HS / SFO<br>DFOP / SFO<br>HS / SFO |
| Sand<br>Ellgehausen<br>(1992a)       | 6.6                     | 20° C - 40% MWHC                                                              | 1280 / 5580                            | 513.8                                                                              |                          | 5.04<br>HS <sup>d)</sup> / SFO                                            |
| Sandy loam<br>Ellgehausen<br>(1992a) | 7.0                     | 20° C - 40% MWHC                                                              | 332 / 1550                             | 191.0                                                                              | 156.6 <sup>c)</sup>      | 0.95/6.32<br>DFOP / SFO                                                   |
| Sandy loam<br>Ellgehausen<br>(1992b) | 7.0                     | 20° C - 40% MWHC                                                              | 148 / 492                              | 101.3                                                                              |                          | 1.63<br>SFO / SFO                                                         |
| Sandy loam<br>Minet (1994a)          | 7.0                     | 20° C - 40% MWHC                                                              | 274 / 1040                             | 198.6                                                                              |                          | 4.12<br>DFOP / SFO                                                        |
| Loamy sand<br>Minet (1994b)          | 7.2                     | 20° C - 40% MWHC                                                              | 327 / 1270                             | 243.7                                                                              |                          | 1.88/3.68<br>DFOP / SFO                                                   |
| Silt loam<br>Minet (1994b)           | 7.3                     | 20° C - 40% MWHC                                                              | 331 / 1340                             | 216.7                                                                              |                          | 1.78/3.86<br>DFOP / SFO                                                   |

<sup>9</sup> n corresponds to the number of soils.



|                                             |      |                                                                                     |                                    |                         |                     |                                    |                                        |
|---------------------------------------------|------|-------------------------------------------------------------------------------------|------------------------------------|-------------------------|---------------------|------------------------------------|----------------------------------------|
| Silt loam Minet (1994c)                     | 7.0  | 20° C - 40% MWHC, 0.2 ppm<br>20° C - 40% MWHC, 0.4 ppm<br>20° C - 40% MWHC, 0.8 ppm | 137 / 742<br>214/1510<br>179 / 843 | 143.1<br>197.9<br>166.8 | 167.8 <sup>c)</sup> | 1.59/6.45<br>2.94/4.9<br>1.39/4.56 | DFOP / SFO<br>DFOP / SFO<br>DFOP / SFO |
| Silt loam Reischmann (1994)                 | 7.0  | 20° C - 50% MWHC                                                                    | 268/1150                           | 181.5                   |                     | 2.81                               | HS / SFO                               |
| Loam Piskorski (2015)                       | 7.6* | 20° C - pF2                                                                         | 183 / 909                          |                         | 183                 | 0.95                               | SFO / SFO                              |
| Sandy clay loam Piskorski (2015)            | 6.3* | 20° C - pF2                                                                         | 318 / 1060                         |                         | 318                 | 0.87                               | SFO / SFO                              |
| Sandy loam Piskorski (2015)                 | 7.7* | 20° C - pF2                                                                         | 188 / 625                          |                         | 188                 | 2.11                               | SFO / SFO                              |
| <b>Geometric mean (if not pH dependent)</b> |      |                                                                                     |                                    |                         | <b>234.13</b>       |                                    |                                        |
| <b>pH dependence, <i>Yes or No</i></b>      |      |                                                                                     |                                    | <b>no</b>               |                     |                                    |                                        |

<sup>a)</sup> Measured in KCl except when marked with \* (measured in water)

<sup>b)</sup> Normalised using a Q10 of 2.58 and Walker equation coefficient of 0.7

<sup>c)</sup> geomean value

<sup>d)</sup> HS kinetics parameters:  $k_1$  0.01,  $k_2$  0.000375,  $t_b$  22.08

### Rate of degradation in soil (aerobic) laboratory studies transformation products (Regulation (EU) N° 283/2013, Annex Part A, point 7.1.2.1.2 and Regulation (EU) N° 284/2013, Annex Part A, point 9.1.1.1)

| <b>CGA265378</b>                                        |                  |                |                                                |                      |                      |                                      |                  |                       |
|---------------------------------------------------------|------------------|----------------|------------------------------------------------|----------------------|----------------------|--------------------------------------|------------------|-----------------------|
| <b>Dark aerobic conditions - Metabolite dosed study</b> |                  |                |                                                |                      |                      |                                      |                  |                       |
| Soil type                                               | pH <sup>a)</sup> | t. °C / % MWHC | DT <sub>50</sub> (d)                           | DT <sub>90</sub> (d) | f. f. $k_f / k_{dp}$ | DT <sub>50</sub> (d) 20 °C pF2/10kPa | St. ( $\chi^2$ ) | Method of calculation |
| Loamy sand (18 Acres)                                   | 6.36             | 20 °C - pF2    | 0.042<br>$\alpha$ : 0.67<br>$\beta$ : 0.08     | 0.703                | -                    | 0.21*                                | 5.52             | FOMC                  |
| Loam (Gartenacker)                                      | 7.53             | 20 °C - pF2    | 0.025<br>$\alpha$ : 0.7522<br>$\beta$ : 0.3645 | 0.309                | -                    | 0.09*                                | 4.25             | FOMC                  |
| Sandy loam (East Anglia)                                | 7.63             | 20 °C - pF2    | 0.017<br>$\alpha$ : 0.7755<br>$\beta$ : 0.2645 | 0.204                | -                    | 0.06*                                | 2.5              | FOMC                  |
| <b>Geometric mean (if not pH dependent)</b>             |                  |                |                                                |                      |                      | <b>0.11</b>                          |                  |                       |
| <b>Arithmetic mean</b>                                  |                  |                |                                                |                      |                      | -                                    |                  |                       |
| <b>pH dependence, <i>Yes or No</i></b>                  |                  |                |                                                |                      |                      | <b>No</b>                            |                  |                       |

<sup>a)</sup> Measured in water

\* normalized DT90/3.32

| <b>CGA339833</b>                                        |                  |                  |                                         |                      |                                                    |                  |                       |  |
|---------------------------------------------------------|------------------|------------------|-----------------------------------------|----------------------|----------------------------------------------------|------------------|-----------------------|--|
| <b>Dark aerobic conditions - Metabolite dosed study</b> |                  |                  |                                         |                      |                                                    |                  |                       |  |
| Soil type                                               | pH <sup>a)</sup> | t. °C / % MWHC   | DT <sub>50</sub> / DT <sub>90</sub> (d) | f. f. $k_f / k_{dp}$ | DT <sub>50</sub> (d) 20 °C pF2/10kPa <sup>b)</sup> | St. ( $\chi^2$ ) | Method of calculation |  |
| Silt loam (Gartenacker)                                 | 7.18             | 20° C - 40% MWHC | 8.66 / 28.8                             | -                    | 6.46                                               | 9.39             | SFO                   |  |
| Loamy sand (Pappelacker)                                | 7.43             | 20° C - 40% MWHC | 15.5 / 51.4                             | -                    | 10.10                                              | 4.42             | SFO                   |  |
| Sandy loam (Weide)                                      | 7.36             | 20° C - 40% MWHC | 11.4 / 37.8                             | -                    | 7.49                                               | 5.68             | SFO                   |  |
| <b>Geometric mean (if not pH dependent)</b>             |                  |                  |                                         |                      |                                                    | <b>7.88</b>      |                       |  |
| <b>Arithmetic mean</b>                                  |                  |                  |                                         |                      |                                                    | -                |                       |  |
| <b>pH dependence, <i>Yes or No</i></b>                  |                  |                  |                                         |                      |                                                    | <b>No</b>        |                       |  |

<sup>a)</sup> Measured in [medium to be stated, usually calcium chloride solution or water]

| <b>CGA192155</b>                                        |                  |                  |                                         |                      |                                                    |                  |                       |  |
|---------------------------------------------------------|------------------|------------------|-----------------------------------------|----------------------|----------------------------------------------------|------------------|-----------------------|--|
| <b>Dark aerobic conditions - Metabolite dosed study</b> |                  |                  |                                         |                      |                                                    |                  |                       |  |
| Soil type                                               | pH <sup>a)</sup> | t. °C / % MWHC   | DT <sub>50</sub> / DT <sub>90</sub> (d) | f. f. $k_f / k_{dp}$ | DT <sub>50</sub> (d) 20 °C pF2/10kPa <sup>b)</sup> | St. ( $\chi^2$ ) | Method of calculation |  |
| Silt loam (Gartenacker)                                 | 7.18             | 20° C - 40% MWHC | 15.4 / 51.3                             | -                    | 15.4                                               | 13.6             | SFO                   |  |
| Loamy sand (Pappelacker)                                | 7.43             | 20° C - 40% MWHC | 23.7 / 78.8                             | -                    | 23.7                                               | 5.45             | SFO                   |  |
| Sandy loam (Weide)                                      | 7.36             | 20° C - 40% MWHC | 16.0 / 53.0                             | -                    | 16.0                                               | 10.5             | SFO                   |  |
| <b>Geometric mean (if not pH dependent)</b>             |                  |                  |                                         |                      |                                                    | <b>18.0</b>      |                       |  |
| <b>Arithmetic mean</b>                                  |                  |                  |                                         |                      |                                                    | -                |                       |  |
| <b>pH dependence, <i>Yes or No</i></b>                  |                  |                  |                                         |                      |                                                    | <b>No</b>        |                       |  |

<sup>a)</sup> Measured in [medium to be stated, usually calcium chloride solution or water]

| SYN545245                                   | Dark aerobic conditions - Metabolite dosed study |                |                                         |                                        |                                                    |                       |                       |
|---------------------------------------------|--------------------------------------------------|----------------|-----------------------------------------|----------------------------------------|----------------------------------------------------|-----------------------|-----------------------|
| Soil type                                   | pH <sup>a)</sup>                                 | t. °C / % MWHC | DT <sub>50</sub> / DT <sub>90</sub> (d) | f. f. k <sub>f</sub> / k <sub>dp</sub> | DT <sub>50</sub> (d) 20 °C pF2/10kPa <sup>b)</sup> | St. (χ <sup>2</sup> ) | Method of calculation |
| Silt loam (Gartenacker )                    | 6.36                                             | 20 °C – pF2    | 0.06 / 0.21                             | -                                      | 0.07                                               | 3.12                  | SFO                   |
| Loamy sand (Pappelacker)                    | 7.53                                             | 20 °C – pF2    | 0.67 / 2.22                             | -                                      | 0.75                                               | 5.27                  | SFO                   |
| Sandy loam (Weide)                          | 7.63                                             | 20 °C – pF2    | 0.61 / 2.01                             | -                                      | 0.68                                               | 2.98                  | SFO                   |
| <b>Geometric mean (if not pH dependent)</b> |                                                  |                |                                         |                                        | <b>0.33</b>                                        |                       |                       |
| <b>Arithmetic mean</b>                      |                                                  |                |                                         |                                        | -                                                  |                       |                       |
| pH dependence, <i>Yes or No</i>             |                                                  |                |                                         |                                        | No                                                 |                       |                       |

<sup>a)</sup> Measured in [medium to be stated, usually calcium chloride solution or water]

<sup>b)</sup> Normalised using a Q10 of 2.58 and Walker equation coefficient of 0.7

### Rate of degradation field soil dissipation studies (Regulation (EU) N° 283/2013, Annex Part A, point 7.1.2.2.1 and Regulation (EU) N° 284/2013, Annex Part A, point 9.1.1.2.1)

| Parent                                                 | Aerobic conditions               |                  |            |                             |                             |                                           |                       |
|--------------------------------------------------------|----------------------------------|------------------|------------|-----------------------------|-----------------------------|-------------------------------------------|-----------------------|
| Soil type (indicate if bare or cropped soil was used). | Location (country or USA state). | pH <sup>a)</sup> | Depth (cm) | DT <sub>50</sub> (d) actual | DT <sub>90</sub> (d) actual | DT <sub>50</sub> (d) Norm <sup>b)</sup> . | Method of calculation |
| Silty clay loam                                        | Codogdan (FR)                    | 7.95             | 0-20       | 8.91                        | 186                         | -                                         | HS                    |
| Silt loam                                              | Padua (IT)                       | 8.1*             | 0-20       | 10.3                        | 34.1                        | -                                         | SFO                   |
| Sandy loam                                             | Euskirchen-Weisesheim (DE)       | 6.3              | 0-20       | 20.3                        | 203                         | 228                                       | HS / SFO              |
| Sand                                                   | Winzerhausen (DE)                | 7.0              | 0-20       | 8.77                        | 268                         | -                                         | HS                    |
| Sandy silty loam                                       | Achern-Gamshurst (DE)            | 6.2              | 0-20       | 4.04                        | 337                         | -                                         | DFOP                  |
| Loam                                                   | Meissner-Vockerode (DE)          | 6.4              | 0-20       | 24.6                        | 321                         | -                                         | HS                    |
| Silt loam                                              | Goch-Nierswalde (DE)             | 5.9              | 0-20       | 4.06                        | 191                         | 112                                       | DFOP / SFO            |
| Silty loam                                             | Obernburg (DE)                   | 6.9              | 0-20       | 7.69                        | 132                         | 74.7                                      | HS / SFO              |
| Sandy loam                                             | Vouvry, Plot 4 (CH)              | 7.39             | 0-30       | 104                         | 332                         | -                                         | SFO                   |
| Sandy loam                                             | Vouvry, Plot 6 (CH)              | 7.39             | 0-30       | 105                         | 350                         | -                                         | SFO                   |
| Sandy loam                                             | Vouvry, Plot 7 (CH)              | 7.39             | 0-30       | 21.5                        | 71.6                        | -                                         | SFO                   |
| Sandy loam                                             | Vouvry, Plot 9 (CH)              | 7.39             | 0-30       | 11.7                        | 214                         | -                                         | DFOP                  |
| Sandy loam (Covered)                                   | Klus (CH)                        | 7.3              | 0-30       | 197.2                       | 790                         | -                                         | HS                    |
| Sandy loam (Non covered)                               | Klus (CH)                        | 7.3              | 0-30       | 16.44                       | 269.9                       | -                                         | DFOP                  |
| pH dependence, <i>Yes or No</i>                        |                                  |                  | no         |                             |                             |                                           |                       |

<sup>a)</sup> Measured in water when \*, other matrix unknown

<sup>b)</sup> Normalised using a Q10 of 2.58 and Walker equation coefficient of 0.7, values are DegT50matrix

### Combined laboratory and field kinetic endpoints for modelling (when not from different populations)\*

Rate of degradation in soil active substance, normalised geometric mean (if not pH dependent)

Only 3 normalised field data are acceptable, therefore the recommended endpoint is the geomean pool field and lab studies 199.7 d (geomean pool field and lab studies, n=12)

Rate of degradation in soil transformation products, normalised geometric mean (if not pH dependent)

|   |   |
|---|---|
| - | - |
| - | - |

Kinetic formation fraction (f. f. k<sub>f</sub> / k<sub>dp</sub>) of transformation products, arithmetic mean

\* Only relevant after implementation of the published EFSA guidance describing how to amalgamate laboratory and field endpoints.

### Soil accumulation (Regulation (EU) N° 283/2013, Annex Part A, point 7.1.2.2.2 and Regulation (EU) N° 284/2013, Annex Part A, point 9.1.1.2.2)

Soil accumulation and plateau concentration

Plateau concentration calculated (see PECsoil below)

### Rate of degradation in soil (anaerobic) laboratory studies active substance (Regulation (EU) N° 283/2013, Annex Part A, point 7.1.2.1.3 and Regulation (EU) N° 284/2013, Annex Part A, point 9.1.1.1)

| Parent                                          | Dark anaerobic conditions |                |                                         |                                          |                       |                       |
|-------------------------------------------------|---------------------------|----------------|-----------------------------------------|------------------------------------------|-----------------------|-----------------------|
| Soil type                                       | pH <sup>a)</sup>          | t. °C / % MWHC | DT <sub>50</sub> / DT <sub>90</sub> (d) | DT <sub>50</sub> (d) 20 °C <sup>b)</sup> | St. (χ <sup>2</sup> ) | Method of calculation |
| Sandy silt loam, Goole <i>Kirkpatrick, 1991</i> | 7.9                       | 25 / pF2       | - stable                                | -                                        | -                     |                       |

|                                         |     |                |          |   |   |  |
|-----------------------------------------|-----|----------------|----------|---|---|--|
| Sandy loam, Stein <i>Minet, 1994a</i>   | 7.0 | 20 / 40 % MWHC | - stable | - | - |  |
| Sand loam, California <i>Adam, 1998</i> | 7.5 | 25 / -         | - stable | - | - |  |
| Geometric mean (if not pH dependent)    |     |                |          |   |   |  |

<sup>a</sup> Measured in [medium to be stated, usually calcium chloride solution or water]

<sup>b</sup> Normalised using a Q10 of 2.58

### Rate of degradation on soil (photolysis) laboratory active substance (Regulation (EU) N° 283/2013, Annex Part A, point 7.1.1.3)

| Parent                | Soil photolysis |                       |                                                                                    |                |                       |
|-----------------------|-----------------|-----------------------|------------------------------------------------------------------------------------|----------------|-----------------------|
| Soil type             | pH <sup>a</sup> | t. °C / soil moisture | DT <sub>50</sub> / DT <sub>90</sub> (d) (corrected to natural sunlight at 30-50°N) | χ <sup>2</sup> | Method of calculation |
| Milton, Sandy loam    | 7.0 (KCl)       | 25°C / 75% FC         | 18.8 / 185                                                                         |                | DFOP                  |
| Somersham, Sandy loam | 6.5 (KCl)       | 20°C / 75% FC         | 17.3 / 120                                                                         |                | DFOP                  |
| Madison, Loamy sand   | 5.4 (water)     | 25°C / 75% FC         | 4.6* / 59.1*                                                                       |                | DFOP                  |
| Gartenacker, Loam     | 7.56 (water)    | 20°C / 75% FC         | 25.8 / 85.3                                                                        |                | DFOP                  |

\* geomean n=3 results corrected to natural sunlight at 30, 40 and 50° N (respective DT<sub>50</sub> / DT<sub>90</sub> : 4.7/59; 4.45/57.6; 4.77/60.6 d)

### Soil adsorption active substance (Regulation (EU) N° 283/2013, Annex Part A, point 7.1.3.1.1 and Regulation (EU) N° 284/2013, Annex Part A, point 9.1.2.1)

| Parent                          | Soil adsorption |                      |                       |                         |                       |                         |      |
|---------------------------------|-----------------|----------------------|-----------------------|-------------------------|-----------------------|-------------------------|------|
| Soil Type                       | OC %            | Soil pH <sup>a</sup> | K <sub>d</sub> (mL/g) | K <sub>doc</sub> (mL/g) | K <sub>F</sub> (mL/g) | K <sub>Foc</sub> (mL/g) | 1/n  |
| Sandy Loam                      | 1.9             | 6.2                  |                       |                         | 63                    | 3317                    | 0.86 |
| Silt loam                       | 2               | 6.3                  |                       |                         | 57.7                  | 2884                    | 0.77 |
| Loam                            | 2.1             | 7.1                  |                       |                         | 54.4                  | 2589                    | 0.86 |
| Loam                            | 2.1             | 7.7                  |                       |                         | 51.6                  | 2455                    | 0.76 |
| Geometric mean, n=4             |                 |                      |                       |                         |                       | 2792.6                  |      |
| Arithmetic mean, n=4            |                 |                      |                       |                         |                       |                         | 0.81 |
| pH dependence, <i>Yes or No</i> |                 |                      | No                    |                         |                       |                         |      |

<sup>a</sup> Measured in calcium chloride solution]

### Soil adsorption transformation products (Regulation (EU) N° 283/2013, Annex Part A, point 7.1.3.1.2 and Regulation (EU) N° 284/2013, Annex Part A, point 9.1.2.1)

| CGA265378 – Data gap            |      |                      |                       |                         |                       |                         |     |
|---------------------------------|------|----------------------|-----------------------|-------------------------|-----------------------|-------------------------|-----|
| Soil Type                       | OC % | Soil pH <sup>a</sup> | K <sub>d</sub> (mL/g) | K <sub>doc</sub> (mL/g) | K <sub>F</sub> (mL/g) | K <sub>Foc</sub> (mL/g) | 1/n |
| -                               |      |                      |                       |                         |                       |                         |     |
| pH dependence, <i>Yes or No</i> |      |                      | -                     |                         |                       |                         |     |

<sup>a</sup> Measured in [medium to be stated, usually calcium chloride solution or water]

| CGA339833 – Data gap for information on two more soils |      |                      |                       |                         |                       |                         |       |
|--------------------------------------------------------|------|----------------------|-----------------------|-------------------------|-----------------------|-------------------------|-------|
| Soil Type                                              | OC % | Soil pH <sup>a</sup> | K <sub>d</sub> (mL/g) | K <sub>doc</sub> (mL/g) | K <sub>F</sub> (mL/g) | K <sub>Foc</sub> (mL/g) | 1/n   |
| Loam (Niagara)                                         | 2.38 | 6.7                  |                       |                         | 0.055                 | 2.3                     | 1.344 |
| pH dependence, <i>Yes or No</i>                        |      |                      | -                     |                         |                       |                         |       |

<sup>a</sup> Measured in [medium to be stated, usually calcium chloride solution or water]

| CGA192155                       |      |                      |                       |                         |                       |                         |              |
|---------------------------------|------|----------------------|-----------------------|-------------------------|-----------------------|-------------------------|--------------|
| Soil Type                       | OC % | Soil pH <sup>a</sup> | K <sub>d</sub> (mL/g) | K <sub>doc</sub> (mL/g) | K <sub>F</sub> (mL/g) | K <sub>Foc</sub> (mL/g) | 1/n          |
| Sand (Lakeland)                 | 0.58 | 5.3                  |                       |                         | 0.25                  | 43.87                   | 0.779        |
| Loam (Collamer)                 | 2.15 | 6.5                  |                       |                         | 0.27                  | 12.37                   | 0.810        |
| Loam (Niagara)                  | 2.38 | 6.7                  |                       |                         | 0.29                  | 12.00                   | 0.809        |
| <b>Geometric mean value</b>     |      |                      |                       |                         |                       | <b>18.67</b>            |              |
| <b>Arithmetic value</b>         |      |                      |                       |                         |                       |                         | <b>0.799</b> |
| pH dependence, <i>Yes or No</i> |      |                      | No                    |                         |                       |                         |              |

<sup>a</sup> Measured in [medium to be stated, usually calcium chloride solution or water]

| SYN545245 – Data gap            |      |                       |                          |                            |                          |                            |     |
|---------------------------------|------|-----------------------|--------------------------|----------------------------|--------------------------|----------------------------|-----|
| Soil Type                       | OC % | Soil pH <sup>a)</sup> | K <sub>d</sub><br>(mL/g) | K <sub>doc</sub><br>(mL/g) | K <sub>F</sub><br>(mL/g) | K <sub>Foc</sub><br>(mL/g) | l/n |
| -                               |      |                       |                          |                            |                          |                            |     |
| pH dependence, <i>Yes or No</i> |      |                       | -                        |                            |                          |                            |     |

<sup>a</sup> Measured in calcium chloride

**Mobility in soil column leaching active substance (Regulation (EU) N° 283/2013, Annex Part A, point 7.1.4.1.1 and Regulation (EU) N° 284/2013, Annex Part A, point 9.1.2.1)**

Column leaching

|                                                                |
|----------------------------------------------------------------|
| Elution (mm): 200 mm                                           |
| Time period (d): 2 d                                           |
| Leachate: 0.02-0.1 % total residues/radioactivity in leachate. |

**Mobility in soil column leaching transformation products (Regulation (EU) N° 283/2013, Annex Part A, point 7.1.4.1.2 and Regulation (EU) N° 284/2013, Annex Part A, point 9.1.2.1)**

Column leaching

|                                                                |
|----------------------------------------------------------------|
| Elution (mm): 200 mm – 508 mm                                  |
| Time period (d): 2-45 d after 321-32 days of ageing, n= 2.     |
| Leachate: 0.02-3.6 % total residues/radioactivity in leachate. |
| Radioactivity in leachates not identified.                     |

**Lysimeter / field leaching studies (Regulation (EU) N° 283/2013, Annex Part A, points 7.1.4.2 / 7.1.4.3 and Regulation (EU) N° 284/2013, Annex Part A, points 9.1.2.2 / 9.1.2.3)**

Lysimeter/ field leaching studies

|              |
|--------------|
| Not required |
|--------------|

**Hydrolytic degradation (Regulation (EU) N° 283/2013, Annex Part A, point 7.2.1.1)**

Hydrolytic degradation of the active substance and metabolites > 10 %

|                                        |
|----------------------------------------|
| pH 5: stable<br>No relevant metabolite |
| pH 7: stable<br>No relevant metabolite |
| pH 9: stable<br>No relevant metabolite |

**Aqueous photochemical degradation (Regulation (EU) N° 283/2013, Annex Part A, points 7.2.1.2 / 7.2.1.3)**

Photolytic degradation of active substance and metabolites above 10 %

|                                                                                                                                                                                                           |
|-----------------------------------------------------------------------------------------------------------------------------------------------------------------------------------------------------------|
| DT <sub>50</sub> : 0.8 experimental days<br>Natural light, 30°N; DT <sub>50</sub> 0.33 days<br>40°N; DT <sub>50</sub> 0.29 days<br>50°N; DT <sub>50</sub> 0.43 days<br>No major metabolites were observed |
| Quantum yield of direct phototransformation in water at Σ > 290 nm<br>2.6 x 10 <sup>-3</sup> mol · Einstein <sup>-1</sup>                                                                                 |

**'Ready biodegradability' (Regulation (EU) N° 283/2013, Annex Part A, point 7.2.2.1)**

Readily biodegradable (yes/no)

|    |
|----|
| No |
|----|

**Aerobic mineralisation in surface water (Regulation (EU) N° 283/2013, Annex Part A, point 7.2.2.2 and Regulation (EU) N° 284/2013, Annex Part A, point 9.2.1)**

| Parent                                                 | pH water phase | pH sed <sup>a)</sup> | t. °C <sup>b)</sup> | DT <sub>50</sub> /DT <sub>90</sub> whole sys. (suspended sediment test) |                                  | St. (χ <sup>2</sup> ) | DT <sub>50</sub> /DT <sub>90</sub> Water (pelagic test) |                                  | St. (χ <sup>2</sup> ) | Method of calculation |
|--------------------------------------------------------|----------------|----------------------|---------------------|-------------------------------------------------------------------------|----------------------------------|-----------------------|---------------------------------------------------------|----------------------------------|-----------------------|-----------------------|
|                                                        |                |                      |                     | At study temp                                                           | Normalised to x °C <sup>c)</sup> |                       | At study temp                                           | Normalised to x °C <sup>c)</sup> |                       |                       |
| Fresh water (Tuckahoe Lake)<br>Phenyl/Pyrrole 10 □ g/L | 7.0 – 8.5      | NA                   | 20                  | NA                                                                      | NA                               | NA                    | 28/92                                                   | NA                               | 6.94                  | SFO                   |
| Fresh Water (Tuckahoe Lake)<br>Phenyl/Pyrrole 95 □ g/L | 7.0 – 8.5      | NA                   | 20                  | NA                                                                      | NA                               | NA                    | 35/116                                                  | NA                               | 7.19                  | SFO                   |

<sup>a</sup> Measured in [medium to be stated, usually calcium chloride solution or water]

<sup>b</sup> Temperature of incubation=temperature that the environmental media was collected or std temperature of 20°C

<sup>c</sup> Normalised using a Q10 of 2.58 to the temperature of the environmental media at the point of sampling. (note temp of x should be stated).

**Mineralisation and non extractable residues (for parent dosed experiments)**

| System identifier (indicate fresh, estuarine or marine) | pH water phase | pH sed | Mineralisation x % after n d. (end of the study). | Non-extractable residues. max x % after n d (suspended sediment test) | Non-extractable residues. max x % after n d (end of the study) (suspended sediment test) |
|---------------------------------------------------------|----------------|--------|---------------------------------------------------|-----------------------------------------------------------------------|------------------------------------------------------------------------------------------|
| Fresh water (Tuckahoe Lake)<br>Phenyl/Pyrrole 10 □ g/L  | 7.0 – 8.5      | NA     | 1.7 – 2.0% after 60 d                             | NA                                                                    | NA                                                                                       |
| Fresh Water (Tuckahoe Lake)<br>Phenyl/Pyrrole 95 □ g/L  | 7.0 – 8.5      | NA     | 1.5 – 3.3% after 60 d                             | NA                                                                    | NA                                                                                       |

**Water / sediment study (Regulation (EU) N° 283/2013, Annex Part A, point 7.2.2.3 and Regulation (EU) N° 284/2013, Annex Part A, point 9.2.2)**

| Parent                      | Distribution<br>Dark water/sediment system (max in water 7.4 after 177 d)<br>Irradiated water/sediment system (max in water 0.1 after 100 d. Max. sed 53.5 % after 7 d) |                      |       |                                               |           |                       |                                          |                       |                                        |                       |                       |
|-----------------------------|-------------------------------------------------------------------------------------------------------------------------------------------------------------------------|----------------------|-------|-----------------------------------------------|-----------|-----------------------|------------------------------------------|-----------------------|----------------------------------------|-----------------------|-----------------------|
| Water / sediment system     | pH water phase                                                                                                                                                          | pH sed <sup>a)</sup> | t. °C | DT <sub>50</sub> /DT <sub>90</sub> whole sys. |           | St. (χ <sup>2</sup> ) | DT <sub>50</sub> /DT <sub>90</sub> water | St. (χ <sup>2</sup> ) | DT <sub>50</sub> /DT <sub>90</sub> sed | St. (χ <sup>2</sup> ) | Method of calculation |
|                             |                                                                                                                                                                         |                      |       | persistence                                   | modelling |                       |                                          |                       |                                        |                       |                       |
| <b>Dark conditions</b>      |                                                                                                                                                                         |                      |       |                                               |           |                       |                                          |                       |                                        |                       |                       |
| River (Rhine) <sup>d)</sup> | 8.4                                                                                                                                                                     | 7.2                  | 20    | 442 <sup>b)</sup>                             |           | -                     | 9.97 <sup>c)</sup>                       | -                     | 576 <sup>b)</sup>                      |                       | SFO                   |

|                                           |         |     |    |                   |             |                   |                  |                  |                   |            |
|-------------------------------------------|---------|-----|----|-------------------|-------------|-------------------|------------------|------------------|-------------------|------------|
| Pond (Tugbach) <sup>d</sup>               | 8.4     | 6.9 | 20 | 677 <sup>b</sup>  | -           | 2.52 <sup>c</sup> | -                | 797 <sup>b</sup> |                   | SFO        |
| <b>Geometric mean at 20°C<sup>b</sup></b> |         |     |    | <b>547</b>        |             |                   |                  |                  |                   |            |
| <b>Irradiated water/sediment system</b>   |         |     |    |                   |             |                   |                  |                  |                   |            |
| River (Rhine) <sup>ef</sup>               | 7.4-7.5 | 7.2 | 20 | 52.6 <sup>g</sup> | 34.6        | -                 | 7.5 <sup>g</sup> | -                | 64.7 <sup>b</sup> | DFOP / SFO |
| Pond (Fröschweiher) <sup>ef</sup>         | 7.3-8.0 | 7.2 | 20 | 48.2 <sup>g</sup> | 30.2        | -                 | 3.7 <sup>h</sup> | -                | 55.5 <sup>b</sup> | DFOP / SFO |
| <b>Geometric mean at 20°C<sup>b</sup></b> |         |     |    | <b>50.4</b>       | <b>32.3</b> |                   |                  |                  |                   |            |

<sup>a</sup> Measured in [medium to be stated, usually calcium chloride solution or water]

<sup>b</sup> SFO model

<sup>c</sup> FOMC model

<sup>d</sup> Original degradation rates determined by Gonazalez-Valero (1992) re-evaluated by Pietsch (2015).

<sup>e</sup> Original degradation rates determined by Adam (2004) re-evaluated by Pietsch (2015).

<sup>f</sup> Irradiated system

<sup>g</sup> DFOP model ( $\ln 2 / k_{\text{slow}}$ )

<sup>h</sup> HS model ( $\ln 2 / k_{\text{slow}}$ )

|                                    |                                                                                                                                                                                                                                   |                      |       |                                               |                  |                                          |                  |                                        |                  |                       |
|------------------------------------|-----------------------------------------------------------------------------------------------------------------------------------------------------------------------------------------------------------------------------------|----------------------|-------|-----------------------------------------------|------------------|------------------------------------------|------------------|----------------------------------------|------------------|-----------------------|
| Metabolite CGA192155               | Max in irradiated total system: 17.3 % AR after 100 days; max in irradiated water: 11.9 % AR after 100 days; max in irradiated sediment: 5.5 % AR after 100 days *<br>kinetic formation fraction ( $k_f/k_{dp}$ ): Not calculated |                      |       |                                               |                  |                                          |                  |                                        |                  |                       |
| Irradiated water / sediment system | pH water phase                                                                                                                                                                                                                    | pH sed <sup>a)</sup> | t. °C | DT <sub>50</sub> /DT <sub>90</sub> whole sys. | St. ( $\chi^2$ ) | DT <sub>50</sub> /DT <sub>90</sub> water | St. ( $\chi^2$ ) | DT <sub>50</sub> /DT <sub>90</sub> sed | St. ( $\chi^2$ ) | Method of calculation |
| River (Rhine)                      | 7.4-7.5                                                                                                                                                                                                                           | 7.2                  | 20    | 1000 <sup>a</sup>                             |                  | 1000 <sup>a</sup>                        |                  | 1000 <sup>a</sup>                      |                  | SFO/ DFOP             |
| Pond (Fröschweiher)                | 7.3-8.0                                                                                                                                                                                                                           | 7.2                  | 20    | 1000 <sup>a</sup>                             |                  | 1000 <sup>a</sup>                        |                  | 1000 <sup>a</sup>                      |                  |                       |
| Geometric mean at 20°C             |                                                                                                                                                                                                                                   |                      |       | 1000                                          |                  | 1000                                     |                  | 1000                                   |                  |                       |

<sup>a</sup>Default value; no decline or insufficient number of data points

\*The maximum occurrence of CGA339833 was 3.8% AR in the total water sediment system

| <b>Mineralisation and non extractable residues (from parent dosed experiments)</b> |                |        |                                                   |                                                    |                                                                       |
|------------------------------------------------------------------------------------|----------------|--------|---------------------------------------------------|----------------------------------------------------|-----------------------------------------------------------------------|
| Water / sediment system                                                            | pH water phase | pH sed | Mineralisation x % after n d. (end of the study). | Non-extractable residues in sed. max x % after n d | Non-extractable residues in sed. max x % after n d (end of the study) |
| River (Rhine)                                                                      | 8.4            | 7.2    | 1.6 after 177 days                                | -                                                  | 16.8 after 177 days                                                   |
| Pond (Tugbach)                                                                     | 8.4            | 6.9    | 1.9 after 177 days                                | -                                                  | 14.4 after 177 days                                                   |
| River (Rhine) <sup>a</sup>                                                         | 7.4-7.5        | 7.2    | 6.4 after 100 days                                | 36.5 after 100 days                                | 36.5 after 100 days                                                   |
| Pond (Fröschweiher) <sup>a</sup>                                                   | 7.3-8.0        | 7.2    | 10.4 after 100 days                               | 42.6 after 100 days                                | 42.6 after 100 days                                                   |

<sup>a</sup> irradiated test system

### Fate and behaviour in air (Regulation (EU) N° 283/2013, Annex Part A, point 7.3.1)

|                                            |                                                                                                                                             |
|--------------------------------------------|---------------------------------------------------------------------------------------------------------------------------------------------|
| Direct photolysis in air                   | Not relevant                                                                                                                                |
| Photochemical oxidative degradation in air | DT <sub>50</sub> : 3.6 hours derived by the Atkinson model concentration assumed = $1.5 \times 10^6$ OH radicals/cm <sup>3</sup> , 12 h day |
| Volatilisation                             | from plant surfaces (BBA guideline): 7 % after 24 hours                                                                                     |
|                                            | from soil surfaces (BBA guideline): 1.6 % AR after 24 h (indirect method)<br>0.04 % AR after 24 h (direct method)                           |
|                                            | < 2.6 ng/cm <sup>2</sup> /h                                                                                                                 |
| Metabolites                                | No potentially volatile metabolites                                                                                                         |

### Residues requiring further assessment (Regulation (EU) N° 283/2013, Annex Part A, point 7.4.1)

|                                                                                                                                                                           |                                                                                                                                                                                                                                                                                                                                                                                                                                                                                   |
|---------------------------------------------------------------------------------------------------------------------------------------------------------------------------|-----------------------------------------------------------------------------------------------------------------------------------------------------------------------------------------------------------------------------------------------------------------------------------------------------------------------------------------------------------------------------------------------------------------------------------------------------------------------------------|
| Environmental occurring residues requiring further assessment by other disciplines (toxicology and ecotoxicology) and or requiring consideration for groundwater exposure | Soil: fludioxonil, unidentified MF2 and soil photolysis metabolites CGA192155, CGA265378, CGA339833, SYN545245 and unidentified D9 (only fludioxonil and unidentified MF2 for seed treatments)<br>Surface water: fludioxonil, CGA192155, CGA265378, CGA339833, SYN545245, unidentified MF2 and unidentified D9 (only fludioxonil, unidentified MF2 and CGA192155 for seed treatments)<br>Sediment: fludioxonil and CGA192155 (also fludioxonil and CGA192155 for seed treatments) |
|---------------------------------------------------------------------------------------------------------------------------------------------------------------------------|-----------------------------------------------------------------------------------------------------------------------------------------------------------------------------------------------------------------------------------------------------------------------------------------------------------------------------------------------------------------------------------------------------------------------------------------------------------------------------------|

|                                                                                                                                                                        |
|------------------------------------------------------------------------------------------------------------------------------------------------------------------------|
| Groundwater: fludioxonil, CGA192155, CGA265378, CGA339833, SYN545245, unidentified MF2 and unidentified D9 (only fludioxonil and unidentified MF2 for seed treatments) |
| Air: fludioxonil                                                                                                                                                       |

**Definition of the residue for monitoring (Regulation (EU) N° 283/2013, Annex Part A, point 7.4.2)**

|                              |
|------------------------------|
| See section 5, Ecotoxicology |
|------------------------------|

**Monitoring data, if available (Regulation (EU) N° 283/2013, Annex Part A, point 7.5)**

|                                                     |              |
|-----------------------------------------------------|--------------|
| Soil (indicate location and type of study)          | Not required |
| Surface water (indicate location and type of study) | Not required |
| Ground water (indicate location and type of study)  | Not required |
| Air (indicate location and type of study)           | Not required |

**PEC soil (Regulation (EU) N° 284/2013, Annex Part A, points 9.1.3 / 9.3.1)**

|                           |                                                                                                                                                                                                                                                                                                   |
|---------------------------|---------------------------------------------------------------------------------------------------------------------------------------------------------------------------------------------------------------------------------------------------------------------------------------------------|
| Parent                    | DT <sub>50</sub> (d): k <sub>1</sub> = 0.01, k <sub>2</sub> = 0.000375, t <sub>b</sub> = 22.08                                                                                                                                                                                                    |
| Method of calculation     | Kinetics: HS<br>Field or Lab: Maximum non-normalised laboratory (dark conditions, photolysis not taken into account for seed treatment)                                                                                                                                                           |
| Application data (A8207M) | Crop: wheat (and oats with exposure envelope approach)<br>Depth of soil layer: 20 cm (ultimate application on 5cm)<br>Soil bulk density: 1.5g/cm <sup>3</sup><br>% plant interception: 0% (Pre-emergence )<br>Number of applications: 1<br>Interval (d): -<br>Application rate(s): 12.5 g a.s./ha |

**A8207M – wheat**

| PEC <sub>(s)</sub><br>(mg/kg) | Single application<br>Actual | Single application<br>Time weighted<br>average | Multiple application<br>Actual | Multiple application<br>Time weighted<br>average |
|-------------------------------|------------------------------|------------------------------------------------|--------------------------------|--------------------------------------------------|
| Initial                       | 0.017                        |                                                |                                |                                                  |
| Short term                    |                              |                                                |                                |                                                  |
| 24h                           | 0.017                        | 0.017                                          |                                |                                                  |
| 2d                            | 0.017                        | 0.017                                          |                                |                                                  |
| 4d                            | 0.017                        | 0.017                                          |                                |                                                  |
| Long term                     |                              |                                                |                                |                                                  |
| 7d                            | 0.017                        | 0.017                                          |                                |                                                  |
| 28d                           | 0.016                        | 0.016                                          |                                |                                                  |
| 50d                           | 0.016                        | 0.016                                          |                                |                                                  |
| 100d                          | 0.015                        | 0.016                                          |                                |                                                  |
| Plateau concentration         | 0.040 mg/kg after 22 yr      |                                                |                                |                                                  |

Method of calculation  
MF2

|                                              |
|----------------------------------------------|
| Molecular weight: 248.2 g/mol (parent value) |
| Maximum % = 7.7 %                            |

| PEC <sub>(s)</sub><br>(mg/kg) | Single application<br>Actual | Single application<br>Time weighted<br>average | Multiple application<br>Actual | Multiple application<br>Time weighted<br>average |
|-------------------------------|------------------------------|------------------------------------------------|--------------------------------|--------------------------------------------------|
| Initial                       | 0.001                        |                                                |                                |                                                  |

|                                 |                                                                                                                                                                                                                                                                                                                                                                                                                                                                                                                                                                                                                                                                                                                                       |
|---------------------------------|---------------------------------------------------------------------------------------------------------------------------------------------------------------------------------------------------------------------------------------------------------------------------------------------------------------------------------------------------------------------------------------------------------------------------------------------------------------------------------------------------------------------------------------------------------------------------------------------------------------------------------------------------------------------------------------------------------------------------------------|
| Parent<br>Method of calculation | Rate constants (d): $k_1= 0.0576$ , $k_2= 0.0027146$ , $t_b= 2.87733$<br>Kinetics: HS<br>Field or Lab: Maximum non-normalised field (to include photolysis for spray applications)                                                                                                                                                                                                                                                                                                                                                                                                                                                                                                                                                    |
| Application data (A8240D)       | <p><b>Crop: vines</b><br/>Depth of soil layer: 5cm<br/>Soil bulk density: 1.5g/cm<sup>3</sup><br/>% plant interception: 60% / 75%<br/>Number of applications: 2<br/>Interval (d): 21<br/>Application rate(s): 500 g a.s./ha</p> <p><b>Crop: pome/stone fruits</b><br/>Depth of soil layer: 5cm<br/>Soil bulk density: 1.5g/cm<sup>3</sup><br/>% plant interception: 65%<br/>Number of applications: 2<br/>Interval (d): 7<br/>Application rate(s): 225 g a.s./ha</p> <p><b>Crop: strawberries</b><br/>Depth of soil layer: 20 cm (ultimate application on 5cm)<br/>Soil bulk density: 1.5g/cm<sup>3</sup><br/>% plant interception: 60%<br/>Number of applications: 2<br/>Interval (d): 10<br/>Application rate(s): 250 g a.s./ha</p> |

**A8240D – Vines, Pome/stone, Strawberries**

|                               | Vines,<br>Multiple applications |                          | Pome/stone,<br>Multiple applications |                          | Strawberries,<br>Multiple applications |                          |
|-------------------------------|---------------------------------|--------------------------|--------------------------------------|--------------------------|----------------------------------------|--------------------------|
|                               | Actual<br>(mg/kg)               | Time weighted<br>average | Actual                               | Time weighted<br>average | Actual                                 | Time weighted<br>average |
| Initial Plateau concentration | 0.382                           |                          | 0.193                                |                          | 0.244                                  |                          |
|                               | 0.606 mg/kg after 6 yrs         |                          | 0.300 mg/kg after 6 yrs              |                          | 0.381 mg/kg after 6 yrs                |                          |

|                                               |                                                                                                                                                                                                 |
|-----------------------------------------------|-------------------------------------------------------------------------------------------------------------------------------------------------------------------------------------------------|
| Method of calculation<br>Metabolite CGA265378 | Molecular weight: 278.2 g/mol<br>DT <sub>50</sub> (d): 0.21 days<br>Kinetics: FOMC (DT <sub>90</sub> / 3.32)<br>Field or Lab: representative worst case from lab studies.<br>maximum % = 10.1 % |
| Metabolite CGA339833                          | Molecular weight: 312.2 g/mol<br>DT <sub>50</sub> (d): 15.5 days<br>Kinetics: SFO<br>Field or Lab: representative worst case from lab studies.<br>maximum % = 13.35%                            |
| Metabolite CGA192155                          | Molecular weight: 202.1 g/mol<br>DT <sub>50</sub> (d): 23.7 days<br>Kinetics: SFO<br>Field or Lab: representative worst case from lab studies.<br>maximum % = 26.95%                            |
| Metabolite SYN545245                          | Molecular weight: 255.2 g/mol<br>DT <sub>50</sub> (d): 0.67 days<br>Kinetics: SFO<br>Field or Lab: representative worst case from lab studies.<br>maximum % = 29.40 %                           |
| MF2                                           | Molecular weight: 248.2 g/mol (parent value)<br>DT <sub>50</sub> (d): 1000 days<br>Kinetics: SFO                                                                                                |



D9

Application data

|                                                                                                                                                       |
|-------------------------------------------------------------------------------------------------------------------------------------------------------|
| Field or Lab: default value.<br>maximum % = 7.7 %                                                                                                     |
| Molecular weight: 248.2 g/mol (parent value)<br>DT <sub>50</sub> (d): 1000 days<br>Kinetics: SFO<br>Field or Lab: default value.<br>maximum % = 7.0 % |
| Crop: Grapes (worst representative case)<br>Application rate assumed: 500 g/ha<br>Parent MW = 248.2 g/mol                                             |

PEC<sub>(s)</sub>  
(mg/kg)

Initial

Plateau concentration

| CGA265378 | CGA339833 | CGA192155 | SYN545245 | MF2*  | D9*   |
|-----------|-----------|-----------|-----------|-------|-------|
| 0.030     | 0.046     | 0.068     | 0.081     | 0.036 | 0.030 |
| -         | -         | -         | -         | -     | -     |

\* in view of laboratory studies, no PECaccumulation needed for these metabolites

**PEC ground water (Regulation (EU) N° 284/2013, Annex Part A, point 9.2.4.1)**

Method of calculation and type of study (e.g. modelling, field leaching, lysimeter) **A8207M**

For FOCUS gw modelling, values used –  
Modelling using FOCUS model(s), with appropriate FOCUSgw scenarios, according to FOCUS guidance.  
*Model(s) used:* (FOCUS-PEARL (v 4.4.4), FOCUS-PELMO (v 5.5.3) and FOCUS-MACRO (v5.5.4))

**Crop: Spring and Winter Cereals**

**Parameters for the active substance**

*Crop uptake factor:* 0  
*Water solubility (mg/L) at 25°C:* 1.8  
*Vapour pressure (Pa) at 20°C:* 0 (worst case assumption)  
*Geometric mean parent DT<sub>50</sub> (d)* 234.1\* (geometric mean, normalised to pF2 at 20°C with Q10 of 2.58, n= 9)  
*K<sub>FOC</sub>/K<sub>FOM</sub> (mL/g)* 2792 / 1619 (geometric mean, n= 4)  
*I/n* 0.81 (arithmetic mean, n= 4)

**Parameters for MF2**

*Crop uptake factor:* 0  
*Water solubility (mg/L) at 25°C:* 1.8 (parent value)  
*Vapour pressure (Pa) at 20°C:* 0 (worst case assumption)  
*DT<sub>50 lab</sub> (d)* 1000 (default value)  
*K<sub>FOC</sub>/K<sub>FOM</sub> (mL/g)* 0 (default value )  
*I/n* 1.0 (default value)  
*Max occurrence* : 8.4 %<sup>a</sup>  
*Formation fraction* - (metabolite applied calculations, corrected rate of 1.05 g/ha)

Application rate

Gross application rate: 12.5 g/ha.  
Crop growth stage: Spring and Winter Cereals (Wheat)  
BBCH 00 (seed treatment)  
Canopy interception %: 0%  
Application rate net of interception: 12.5 g/ha.  
No. of applications: 1  
Time of application (relative application dates): 10 days pre-emergence

\* The geometric mean DT<sub>50</sub> of 199.7 d (field and lab study, n=12) is the recommended EU endpoint.

<sup>a</sup> recommended max occurrence is 7.7%

**PEC(gw) - FOCUS modelling results (80<sup>th</sup> percentile annual average concentration at 1m)**

| Use                                               | Scenario     | FOCUS-PEARL 4.4.4 |         | FOCUS-PELMO 5.5.3 |       | FOCUS-MACRO 5.5.4 |       |
|---------------------------------------------------|--------------|-------------------|---------|-------------------|-------|-------------------|-------|
|                                                   |              | Parent            | MF2     | Parent            | MF2   | Parent            | MF2   |
| Spring cereals,<br>1 x 12.5 g a.s./ha,<br>BBCH 00 | Châteaudun   | < 0.001           | 0.761   | < 0.001           | 0.648 | < 0.001           | 0.614 |
|                                                   | Hamburg      | < 0.001           | 0.736   | < 0.001           | 0.554 |                   |       |
|                                                   | Jokioinen    | < 0.001           | 0.802   | < 0.001           | 0.670 |                   |       |
|                                                   | Kremsmünster | < 0.001           | 0.384   | < 0.001           | 0.446 |                   |       |
|                                                   | Okehampton   | < 0.001           | 0.338   | < 0.001           | 0.306 |                   |       |
|                                                   | Porto        | < 0.001           | 0.303   | < 0.001           | 0.232 |                   |       |
| Winter cereals,<br>1 x 12.5 g a.s./ha,<br>BBCH 00 | Chateaudun   | < 0.001           | 1.010   | < 0.001           | 0.970 | < 0.001           | 1.070 |
|                                                   | Hamburg      | < 0.001           | 0.650   | < 0.001           | 0.537 |                   |       |
|                                                   | Jokioinen    | < 0.001           | 0.906   | < 0.001           | 0.751 |                   |       |
|                                                   | Kremsmunster | < 0.001           | 0.329   | < 0.001           | 0.393 |                   |       |
|                                                   | Okehampton   | < 0.001           | 0.314   | < 0.001           | 0.315 |                   |       |
|                                                   | Piacenza     | < 0.001           | 0.575   | < 0.001           | 0.521 |                   |       |
|                                                   | Porto        | < 0.001           | 0.289   | < 0.001           | 0.305 |                   |       |
|                                                   | Sevilla      | < 0.001           | 1.410   | < 0.001           | 0.744 |                   |       |
| Thiva                                             | < 0.001      | 1.800             | < 0.001 | 0.916             |       |                   |       |

Method of calculation and type of study (e.g. modelling, field leaching, lysimeter) (for product **A8240D**)

Modelling using FOCUS model(s), with appropriate FOCUSgw scenarios, according to FOCUS guidance.  
*Model(s) used:* (FOCUS-PEARL (v 4.4.4), FOCUS-PELMO (v 5.5.3) and FOCUS-MACRO (v5.5.4))

**Crop: Grapes, pome fruit (apples) and strawberries**  
**fludioxonil**

*Crop uptake factor:* 0  
*Water solubility (mg/L):* 1.8 at 25°C

*Vapour pressure*: 0 Pa (worst case assumption) at 20°C  
*Geometric mean parent DT<sub>50</sub>*: 234.1 d (geometric mean, normalised to pF2 at 20°C with Q10 of 2.58, n= 9)  
*K<sub>FOC</sub>/K<sub>FOM</sub>* (mL/g): 2792 / 1619 (geometric mean, n=4)  
*l/n* = 0.81 (arithmetic mean, n=4)

**Metabolites: CGA265378**

*Molar mass*: 278.2 g/mol  
*Crop uptake factor*: 0  
*Water solubility* (mg/L): 120 at 25°C  
*Vapour pressure*: 0 Pa (worst case assumption) at 20°C  
*Geometric mean DT<sub>50</sub> (lab)*: 0.11d (geometric mean, normalised to pF2 at 20°C with Q10 of 2.58, n=3).  
*Max occurrence*: 10.1%<sup>a</sup>  
*K<sub>FOC</sub>/K<sub>FOM</sub>*: 0 (default value)  
*l/n* = 1.00 (default value).

**Metabolites: CGA339833**

*Molar mass*: 312.2 g/mol  
*Crop uptake factor*: 0  
*Water solubility* (mg/L): 31000 at 25°C  
*Vapour pressure*: 0 Pa (worst case assumption) at 20°C  
*Geometric mean DT<sub>50</sub> (lab)*: 7.88 d (geometric mean, normalised to pF2 at 20°C with Q10 of 2.58, n=3).  
*Max occurrence*: 13.35%<sup>a</sup>  
*K<sub>FOC</sub>/K<sub>FOM</sub>*: 2.3 / 1.3 mL/g (single acceptable value)  
*l/n* = 1.344 (value corresponding to min Kfoc)

**Metabolites: CGA192155**

*Molar mass*: 202.1 g/mol  
*Crop uptake factor*: 0  
*Water solubility* (mg/L): 4900 at 25°C  
*Vapour pressure*: 0 Pa (worst case assumption) at 20°C  
*Geometric mean DT<sub>50</sub> (d)*: 18.0d (geometric mean, laboratory, normalised to pF2 at 20°C with Q10 of 2.58, n=3).  
*Formation from parent*  
*Max occurrence*: 26.95 %<sup>a</sup>  
*K<sub>FOC</sub>/K<sub>FOM</sub>*: 18.7 / 10.8 mL/g (geometric mean, n=3)  
*l/n* = 0.80 (arithmetic mean, n=3)

**Metabolites: SYN545245**

*Molar mass*: 255.2 g/mol  
*Crop uptake factor*: 0  
*Water solubility* (mg/L): 1.8 at 25°C (parent value)  
*Vapour pressure*: 0 Pa (worst case assumption) at 20°C  
*Geometric mean DT<sub>50</sub>*: 0.33d (geometric mean, laboratory, normalised to pF2 at 20°C with Q10 of 2.58, n=3).  
*Max occurrence*: 29.40 %<sup>a</sup>  
*K<sub>FOC</sub>/K<sub>FOM</sub>*: 0 (default value)  
*l/n* = 1 (default value)

**Metabolites: MF2**

*Molar mass*: 248.2 g/mol (parent value)  
*Crop uptake factor*: 0  
*Water solubility* (mg/L): 1.8 at 25°C (parent value)  
*Vapour pressure*: 0 Pa (worst case assumption) at 20°C  
*Geometric mean DT<sub>50</sub>*: 1000 d (default value)  
*Max occurrence*: 8.4 %<sup>a, b</sup>  
*K<sub>FOC</sub>/K<sub>FOM</sub>*: 0 (default value)  
*l/n* = 1 (default value)

**Metabolites: D9**

*Molar mass*: 248.2 g/mol (parent value)  
*Crop uptake factor*: 0  
*Water solubility* (mg/L): 1.8 at 25°C (parent value)  
*Vapour pressure*: 0 Pa (worst case assumption) at 20°C  
*Geometric mean DT<sub>50</sub>*: 1000 d (default value)

Application rate: (for product A8240D)

|                                                                                                                                                                                                                                                                                                                                                                                                                                                                                                                                                                                                                                                                                                                                                                                                                                                                                                                                                                                                                                                                                      |
|--------------------------------------------------------------------------------------------------------------------------------------------------------------------------------------------------------------------------------------------------------------------------------------------------------------------------------------------------------------------------------------------------------------------------------------------------------------------------------------------------------------------------------------------------------------------------------------------------------------------------------------------------------------------------------------------------------------------------------------------------------------------------------------------------------------------------------------------------------------------------------------------------------------------------------------------------------------------------------------------------------------------------------------------------------------------------------------|
| <p><i>Max occurrence: 6.9 %<sup>a, c</sup></i><br/><i>K<sub>FOC</sub>/K<sub>FOM</sub>: 0 (default value)</i><br/><i>I/n = 1 (default value)</i></p>                                                                                                                                                                                                                                                                                                                                                                                                                                                                                                                                                                                                                                                                                                                                                                                                                                                                                                                                  |
| <p><b>Gross application rate of fludioxonil:</b><br/>Grapes = 2 x 500 g/ha (interval 21 d)<br/>pome fruit (apples) = 2 x 225 g/ha (interval 7 d)<br/>strawberries = 2 x 250 g/ha (interval 10 d)</p> <p><b>Gross application rate of CGA265378:<sup>a</sup></b><br/>Grapes = 61.6 g/ha, pome fruit (apples) = 27.7 g/ha, strawberries = 30.8 g/ha</p> <p><b>Gross application rate of CGA339833:<sup>a</sup></b><br/>Grapes = 84.0 g/ha, pome fruit (apples) = 37.8 g/ha, strawberries = 42.0 g/ha</p> <p><b>Gross application rate of CGA192155:<sup>a</sup></b><br/>Grapes = 109.7 g/ha, pome fruit (apples) = 9.4 g/ha, strawberries = 54.9 g/ha</p> <p><b>Gross application rate of SYN545245:<sup>a</sup></b><br/>Grapes = 151.1 g/ha, pome fruit (apples) = 68.0 g/ha, strawberries = 75.6 g/ha</p> <p><b>Canopy interception (%):</b><br/>Grapes = 60 / 75 % (BBCH 67-69 / 85-89<sup>d</sup>)<br/>pome fruit (apples) = 65 / 65 (BBCH 74-89)<br/>strawberries = 60 / 60 (BBCH 61-89)</p> <p><b>Time of application (absolute or relative application dates): relative</b></p> |

<sup>a</sup>max occurrence (%), used to calculate the application rate for metabolites, along with a molar correction factor

<sup>b</sup> max occurrence for MF2 is 7.7%

<sup>c</sup> max occurrence for D9 is 7.0%

<sup>d</sup> the first application is intended to take place at flowering (BBCH 67-69), while the second application takes place at fruit ripening (BBCH 85-89)

**Table 0-1: Application dates used in the modelling**

| Crop                                                                                   | Scenario     | Application dates (absolute) |                             |
|----------------------------------------------------------------------------------------|--------------|------------------------------|-----------------------------|
|                                                                                        |              | 1 <sup>st</sup> Application  | 2 <sup>nd</sup> Application |
| Vine<br>Use No.1<br><br>BBCH 67 as 1st and BBCH 85 as 2nd appl<br><br>(AppDate v2.0b)  | Châteaudun   | 22-Aug (234)                 | 17-Oct (290)                |
|                                                                                        | Hamburg      | 1-Aug (213)                  | 1-Oct (274)                 |
|                                                                                        | Kremsmünster | 1-Aug (213)                  | 1-Oct (274)                 |
|                                                                                        | Piacenza     | 22-Aug (234)                 | 17-Oct (290)                |
|                                                                                        | Porto        | 14-Aug (226)                 | 20-Sep (263)                |
|                                                                                        | Sevilla      | 24-Jul (205)                 | 2-Nov (306)                 |
|                                                                                        | Thiva        | 26-Jul (207)                 | 2-Oct (275)                 |
| Apple<br>Use No.2<br><br>BBCH 74 as 1st appl., 7 day interval<br>(AppDate v2.0b)       | Châteaudun   | 27-Jul (208)                 | 3-Aug (215)                 |
|                                                                                        | Hamburg      | 6-Jul (187)                  | 13-Jul (194)                |
|                                                                                        | Jokioinen    | 31-Jul (212)                 | 7-Aug (219)                 |
|                                                                                        | Kremsmünster | 6-Jul (187)                  | 13-Jul (194)                |
|                                                                                        | Okehampton   | 28-Jul (209)                 | 4-Aug (216)                 |
|                                                                                        | Piacenza     | 11-Aug (223)                 | 18-Aug (230)                |
|                                                                                        | Porto        | 26-Aug (238)                 | 2-Sep (245)                 |
|                                                                                        | Sevilla      | 3-Aug (215)                  | 10-Aug (222)                |
|                                                                                        | Thiva        | 21-Aug (233)                 | 28-Aug (240)                |
| Strawberry<br>Use No.3<br><br>BBCH 61 as 1st appl., 10 day interval<br>(AppDate v2.0b) | Hamburg      | 2-May (122)                  | 12-May (132)                |
|                                                                                        | Jokioinen    | 27-Jun (178)                 | 7-Jul (188)                 |
|                                                                                        | Kremsmünster | 2-May (122)                  | 12-May (132)                |
|                                                                                        | Sevilla      | 3-May (123)                  | 13-May (133)                |

Numbers in brackets are the corresponding 'Julian Day' numbers

Application dates in grey boxes are not considered as representative of the intended use. The recommended application date for calculation is 21 days after the first application date (intended GAP).

For CGA339833, PEC<sub>gw</sub> after applications on vines were performed considering the same 1st application date and a 2nd application date 21 days after the first one.

### PEC(gw) - FOCUS modelling results (80<sup>th</sup> percentile annual average concentration at 1m)

|                                    | Scenario     | Parent (µg/L) | Metabolites (µg/L) |           |           |           |      | D9   |
|------------------------------------|--------------|---------------|--------------------|-----------|-----------|-----------|------|------|
|                                    |              |               | CGA265378          | CGA339833 | CGA192155 | SYN545245 | MF2  |      |
| Vines<br>4.4.4<br>FOCUS PEARL      | Chateaudun   | < 0.001       | < 0.001            | 0.665     | 0.077     | < 0.001   | 11.4 | 9.38 |
|                                    | Hamburg      | < 0.001       | < 0.001            | 3.213     | 0.225     | < 0.001   | 9.85 | 8.09 |
|                                    | Kremsmunster | < 0.001       | < 0.001            | 1.222     | 0.089     | < 0.001   | 6.5  | 5.34 |
|                                    | Piacenza     | < 0.001       | < 0.001            | 1.246     | 0.262     | < 0.001   | 13.8 | 11.3 |
|                                    | Porto        | < 0.001       | < 0.001            | 0.729     | 0.144     | < 0.001   | 5.1  | 4.19 |
|                                    | Sevilla      | < 0.001       | < 0.001            | 0.555     | 0.047     | < 0.001   | 11.1 | 9.08 |
|                                    | Thiva        | < 0.001       | < 0.001            | 0.622     | 0.015     | < 0.001   | 26.6 | 21.8 |
| Vines<br>5.5.3<br>FOCUS PELMO      | Chateaudun   | < 0.001       | < 0.001            | 0.334     | 0.050     | < 0.001   | 12.5 | 10.3 |
|                                    | Hamburg      | < 0.001       | < 0.001            | 1.113     | 0.210     | < 0.001   | 12.3 | 10.1 |
|                                    | Kremsmunster | < 0.001       | < 0.001            | 0.598     | 0.096     | < 0.001   | 7.77 | 6.38 |
|                                    | Piacenza     | < 0.001       | < 0.001            | 0.632     | 0.392     | < 0.001   | 7.72 | 6.34 |
|                                    | Porto        | < 0.001       | < 0.001            | 0.474     | 0.223     | < 0.001   | 5.8  | 4.77 |
|                                    | Sevilla      | < 0.001       | < 0.001            | 0.010     | 0.033     | < 0.001   | 24.7 | 20.3 |
|                                    | Thiva        | < 0.001       | < 0.001            | 0.005     | 0.014     | < 0.001   | 28.8 | 23.6 |
| Vines<br>5.5.4 -<br>MACRO<br>FOCUS | Chateaudun   | < 0.001       | < 0.001            | -         | 0.026     | < 0.001   | 15.1 | 12.4 |

|                                        | Scenario     | Parent (µg/L) | Metabolites (µg/L) |           |           |           |      |      |
|----------------------------------------|--------------|---------------|--------------------|-----------|-----------|-----------|------|------|
|                                        |              |               | CGA265378          | CGA339833 | CGA192155 | SYN545245 | MF2  | D9   |
| FOCUS PEARL 4.4.4<br>Pome/stone fruits | Chateaudun   | < 0.001       | < 0.001            | 0.304     | 0.016     | < 0.001   | 7.07 | 5.81 |
|                                        | Hamburg      | < 0.001       | < 0.001            | 2.652     | 0.060     | < 0.001   | 13   | 10.7 |
|                                        | Jokioinen    | < 0.001       | < 0.001            | 3.391     | 0.015     | < 0.001   | 13.5 | 11.1 |
|                                        | Kremsmunster | < 0.001       | < 0.001            | 0.486     | 0.021     | < 0.001   | 5.08 | 4.18 |
|                                        | Okehampton   | < 0.001       | < 0.001            | 1.109     | 0.038     | < 0.001   | 4.68 | 3.84 |
|                                        | Piacenza     | < 0.001       | < 0.001            | 0.382     | 0.074     | < 0.001   | 7.46 | 6.13 |
|                                        | Porto        | < 0.001       | < 0.001            | 0.792     | 0.044     | < 0.001   | 2.76 | 2.27 |
|                                        | Sevilla      | < 0.001       | < 0.001            | 0.149     | 0.012     | < 0.001   | 9.25 | 7.60 |
| Thiva                                  | < 0.001      | < 0.001       | 0.049              | 0.008     | < 0.001   | 14.8      | 12.1 |      |
| FOCUS PELMO 5.5.3<br>Apple             | Chateaudun   | < 0.001       | < 0.001            | 0.114     | 0.006     | < 0.001   | 7.17 | 5.89 |
|                                        | Hamburg      | < 0.001       | < 0.001            | 1.857     | 0.029     | < 0.001   | 7.53 | 6.18 |
|                                        | Jokioinen    | < 0.001       | < 0.001            | 4.016     | 0.016     | < 0.001   | 9.29 | 7.63 |
|                                        | Kremsmunster | < 0.001       | < 0.001            | 0.969     | 0.022     | < 0.001   | 6.02 | 4.95 |
|                                        | Okehampton   | < 0.001       | < 0.001            | 0.307     | 0.041     | < 0.001   | 4.54 | 3.73 |
|                                        | Piacenza     | < 0.001       | < 0.001            | 0.853     | 0.106     | < 0.001   | 3.63 | 2.98 |
|                                        | Porto        | < 0.001       | < 0.001            | 0.568     | 0.052     | < 0.001   | 2.48 | 2.03 |
|                                        | Sevilla      | < 0.001       | < 0.001            | 0.068     | < 0.001   | < 0.001   | 21.6 | 17.8 |
| Thiva                                  | < 0.001      | < 0.001       | 0.131              | 0.001     | < 0.001   | 14.8      | 12.2 |      |
| 5.5.4 - Apple<br>FOCUS MACRO           | Chateaudun   | < 0.001       | < 0.001            | -         | < 0.001   | < 0.001   | 20.2 | 16.6 |

|                   | Scenario     | Parent (µg/L) | Metabolites (µg/L) |           |           |           |      |      |
|-------------------|--------------|---------------|--------------------|-----------|-----------|-----------|------|------|
|                   |              |               | CGA265378          | CGA339833 | CGA192155 | SYN545245 | MF2  | D9   |
| FOCUS PEARL 4.4.4 | Hamburg      | < 0.001       | < 0.001            | 1.984     | 0.019     | < 0.001   | 11.1 | 9.10 |
|                   | Jokioinen    | < 0.001       | < 0.001            | 3.356     | 0.004     | < 0.001   | 10.2 | 8.42 |
|                   | Kremsmunster | < 0.001       | < 0.001            | 0.528     | 0.013     | < 0.001   | 5.9  | 4.84 |
|                   | Sevilla      | < 0.001       | < 0.001            | 0.012     | < 0.001   | < 0.001   | 17.9 | 14.7 |
| FOCUS PELMO 5.5.3 | Hamburg      | < 0.001       | < 0.001            | 0.306     | 0.013     | < 0.001   | 7.86 | 6.46 |
|                   | Jokioinen    | < 0.001       | < 0.001            | 1.592     | 0.003     | < 0.001   | 9.21 | 7.57 |
|                   | Kremsmunster | < 0.001       | < 0.001            | 0.196     | 0.013     | < 0.001   | 6.66 | 5.47 |
|                   | Sevilla      | < 0.001       | < 0.001            | 0.001     | < 0.001   | < 0.001   | 6.72 | 5.52 |

**PEC surface water and PEC sediment (Regulation (EU) N° 284/2013, Annex Part A, points 9.2.5 / 9.3.1)**

|                                                               |                                                                                                                                                                                                                                                                                                                                                                     |
|---------------------------------------------------------------|---------------------------------------------------------------------------------------------------------------------------------------------------------------------------------------------------------------------------------------------------------------------------------------------------------------------------------------------------------------------|
| Parent<br>Parameters used in FOCUS <sub>sw</sub> step 1 and 2 | Version control no. of FOCUS calculator: Step 1-2 (v 3.2)<br>Molecular weight (g/mol): 248.2<br>K <sub>OC</sub> /K <sub>OM</sub> (mL/g): 2792 (geomean, n=4)<br>DT <sub>50</sub> soil (d): 234.1 days (geomean normalized lab, n=9)*<br>DT <sub>50</sub> water/sediment/system (d): 547 d (geomean dark sediment water studies n=2)                                 |
| Parameters used in FOCUS <sub>sw</sub> step 3 (if performed)  | Version control no.'s of FOCUS software:<br>SWASH (v 5.3; with FOCUS-MACRO (v 5.5.4), FOCUS-PRZM (v 4.3.1) and FOCUS-TOXSWA (v 4.4.3)).<br>ECPA tool SWAN (v 4.0.1).<br>Water solubility (mg/L): 1.8<br>Vapour pressure: 0. Pa at 20°C (worst case)<br>1/n: 0.81<br>DT <sub>50</sub> water (d): 1000<br>DT <sub>50</sub> sediment (d): 547<br>Crop uptake factor: 0 |
| Application rate <b>A8207M</b>                                | Crop and growth stage: spring and winter cereals BBCH 00<br>Number of applications: 1 (seed treatment)<br>Interval (d): -<br>Application rate(s): 12.5 g a.s./ha<br>Application window: Oct-Feb<br>Crop interception (%): 0 % (no interception)                                                                                                                     |
| Application rate <b>A8240D</b>                                | Crop and growth stage: vines, late applications BBCH 67-69 / 85-89<br>Number of applications: 2<br>Interval (d): 21<br>Application rate(s): 500 g a.s./ha<br>Application window: Oct-Feb (STEP 1-2), see below for STEP 3-4<br>Crop interception (%): full canopy                                                                                                   |
|                                                               | Crop and growth stage: pome fruit, late applications BBCH 74-89<br>Number of applications: 2<br>Interval (d): 7<br>Application rate(s): 225 g a.s./ha<br>Application window: Oct-Feb (STEP 1-2), see below for STEP 3-4<br>Crop interception (%): full canopy                                                                                                       |
|                                                               | Crop and growth stage: fruiting vegetables (strawberries), BBCH 61-89<br>Number of applications: 2<br>Interval (d): 10<br>Application rate(s): 250 g a.s./ha<br>Application window: Oct-Feb (STEP 1-2), see below for STEP 3-4<br>Crop interception (%): full canopy                                                                                                |
|                                                               | Crop and growth stage: Protected strawberries<br>Number of applications: 1<br>Interval (d): -<br>Application rate(s): 500 g a.s./ha<br>Application window: Oct-Feb<br>Crop interception (%): full canopy                                                                                                                                                            |

\* the recommended DT<sub>50</sub> value is 199.7 d, geomean normalized lab and field studies, n=12

**Application windows for STEP 3-4 modelling**

| Crop                                  | Scenario        | Start of Window | End of Window |
|---------------------------------------|-----------------|-----------------|---------------|
| Vine<br>(late application)<br>BBCH 67 | D6              | 22-Jul (203)    | 11-Sep (254)  |
|                                       | R1              | 29-Jul (210)    | 18-Sep (261)  |
|                                       | R2 <sup>a</sup> | 20-Jul (201)    | 9-Sep (252)   |
|                                       | R3              | 22-Aug (234)    | 12-Oct (285)  |

| Crop                                        | Scenario        | Start of Window | End of Window |
|---------------------------------------------|-----------------|-----------------|---------------|
|                                             | R4 <sup>a</sup> | 10-Jul (191)    | 30-Aug (242)  |
| Vine<br>(late application)<br>Harvest - PHI | D6              | 30-Aug (242)    | 20-Oct (293)  |
|                                             | R1              | 19-Aug (231)    | 9-Oct (282)   |
|                                             | R2              | 20-Jul (201)    | 9-Sep (252)   |
|                                             | R3              | 21-Aug (233)    | 11-Oct (284)  |
|                                             | R4              | 10-Jul (191)    | 30-Aug (242)  |
| Pome/stone fruit<br>(late application)      | D3              | 26-Aug (238)    | 2-Oct (275)   |
|                                             | D4              | 29-Aug (241)    | 5-Oct (278)   |
|                                             | D5              | 18-Aug (230)    | 24-Sep (267)  |
|                                             | R1              | 26-Aug (238)    | 2-Oct (275)   |
|                                             | R2 <sup>a</sup> | 20-Aug (233)    | 27-Sep (270)  |
|                                             | R3              | 3-Aug (215)     | 9-Sep (252)   |
|                                             | R4              | 3-Aug (215)     | 9-Sep (252)   |
| Vegetables, fruiting                        | D6              | 1-Jun (152)     | 11-Jul (192)  |
|                                             | R2              | 18-Jun (169)    | 28-Jul (209)  |
|                                             | R3              | 2-Jul (183)     | 11-Aug (223)  |
|                                             | R4 <sup>a</sup> | 2-Jun (153)     | 12-Jul (193)  |

<sup>a</sup> Window chosen to end at harvest – pre-harvest interval.

Numbers in brackets are the corresponding ‘Julian Day’ numbers

#### FOCUS Step 1-2 Global Maximum PEC<sub>sw</sub> and PEC<sub>sed</sub> for fludioxonil

| Crop                                 | Scenario                  | PEC <sub>sw</sub> (µg/L) |             | PEC <sub>sed</sub> (µg/kg) |
|--------------------------------------|---------------------------|--------------------------|-------------|----------------------------|
|                                      |                           | Actual                   | TWA         |                            |
| Cereals                              | STEP 1                    | 0.882                    |             | 24.6                       |
|                                      | STEP 2 North EU (Oct-Feb) | 0.436                    | 0.430       | 12.2                       |
|                                      | STEP 2 South EU (Oct-Feb) | 0.349                    | 0.344       | 9.74                       |
| Vines, late applications             | STEP 1                    | 97.3                     |             | 2130                       |
|                                      | STEP 2 North EU (Oct-Feb) | 20.3 (13.4)              | 18.3 (9.15) | 515 (273)                  |
|                                      | STEP 2 South EU (Oct-Feb) | 17.6 (13.4)              | 15.6 (8.00) | 439 (234)                  |
| Pome/stone fruits, late applications | STEP 1                    | 55.3                     |             | 1020                       |
|                                      | STEP 2 North EU (Oct-Feb) | 11.7 (11.8)              | 8.82 (5.26) | 258 (146)                  |
|                                      | STEP 2 South EU (Oct-Feb) | 11.7 (11.8)              | 7.93 (4.81) | 228 (131)                  |
| Strawberries                         | STEP 1                    | 39.9                     |             | 1010                       |
|                                      | STEP 2 North EU (Oct-Feb) | 6.32 (3.28)              | 5.93 (3.06) | 167 (86.4)                 |
|                                      | STEP 2 South EU (Oct-Feb) | 5.28 (2.76)              | 4.92 (2.55) | 139 (71.9)                 |

Single applications are presented in brackets



### FOCUS Step 3 Global Maximum PEC<sub>sw</sub> and PEC<sub>sed</sub> for fludioxonil

| Application                              | Scenario    | PEC <sub>sw</sub><br>(µg/L) | PEC <sub>sed</sub><br>(µg/kg) | Entry<br>Route | PEC <sub>sw</sub><br>(µg/L) | PEC <sub>sed</sub><br>(µg/kg) | Entry<br>Route |
|------------------------------------------|-------------|-----------------------------|-------------------------------|----------------|-----------------------------|-------------------------------|----------------|
|                                          |             | Single application          |                               |                | Multiple application        |                               |                |
| Vine (late application)<br>BBCH 67       | D6 d        | <b>8.54</b>                 | 24.2                          | drift          | <b>7.86</b>                 | 34.5                          | drift          |
|                                          | R1 p        | 0.312                       | 3.47                          | drift          | 0.428                       | 6.02                          | drift          |
|                                          | R1 s        | <b>6.09</b>                 | 0.723                         | drift          | <b>5.52</b>                 | 1.42                          | drift          |
|                                          | R2 s        | <b>8.39</b>                 | 3.87                          | drift          | <b>7.40</b>                 | 6.77                          | drift          |
|                                          | R3 s        | <b>8.83</b>                 | 9.17                          | drift          | <b>7.79</b>                 | 18.0                          | drift          |
| Vine (late application)<br>Harvest - PHI | R4 s        | <b>6.26</b>                 | 2.48                          | drift          | <b>5.52</b>                 | 5.38                          | drift          |
|                                          | D6 d        | <b>8.54</b>                 | 24.3                          | drift          | <b>7.84</b>                 | 34.7                          | drift          |
|                                          | R1 p        | 0.309                       | 3.54                          | drift          | 0.410                       | 6.09                          | drift          |
|                                          | R1 s        | <b>6.26</b>                 | 1.19                          | drift          | <b>5.52</b>                 | 1.53                          | drift          |
|                                          | R2 s        | <b>8.39</b>                 | 3.87                          | drift          | <b>7.40</b>                 | 6.77                          | drift          |
| R3 s                                     | <b>8.83</b> | 9.17                        | drift                         | <b>7.79</b>    | 18.0                        | drift                         |                |
| R4 s                                     | <b>6.26</b> | 2.48                        | drift                         | <b>5.52</b>    | 5.38                        | drift                         |                |

| Application                                       | Scenario    | PEC <sub>sw</sub><br>(µg/L) | PEC <sub>sed</sub><br>(µg/kg) | Entry<br>Route | PEC <sub>sw</sub><br>(µg/L) | PEC <sub>sed</sub><br>(µg/kg) | Entry<br>Route |
|---------------------------------------------------|-------------|-----------------------------|-------------------------------|----------------|-----------------------------|-------------------------------|----------------|
|                                                   |             | Single application          |                               |                | Multiple application        |                               |                |
| Pome/stone fruit<br>(late application)<br>BBCH 74 | D3 d        | <b>8.23</b>                 | 9.71                          | drift          | <b>6.55</b>                 | 15.8                          | drift          |
|                                                   | D4p         | 0.367                       | 4.30                          | drift          | 0.525                       | 7.05                          | drift          |
|                                                   | D4s         | <b>7.94</b>                 | 0.712                         | drift          | <b>6.37</b>                 | 0.977                         | drift          |
|                                                   | D5p         | 0.367                       | 4.71                          | drift          | 0.557                       | 7.70                          | drift          |
|                                                   | D5s         | <b>8.91</b>                 | 2.53                          | drift          | <b>7.13</b>                 | 3.55                          | drift          |
|                                                   | R1p         | 0.37                        | 4.11                          | drift          | 0.558                       | 6.70                          | drift          |
|                                                   | R1s         | <b>6.31</b>                 | 1.12                          | drift          | <b>5.06</b>                 | 1.64                          | drift          |
|                                                   | R2s         | <b>8.46</b>                 | 3.67                          | drift          | <b>6.78</b>                 | 6.19                          | drift          |
|                                                   | R3s         | <b>8.90</b>                 | 2.89                          | drift          | <b>7.13</b>                 | 5.54                          | drift          |
| R4s                                               | <b>6.31</b> | 1.82                        | drift                         | <b>5.06</b>    | 3.92                        | drift                         |                |

| Application             | Scenario | PEC <sub>sw</sub><br>(µg/L) | PEC <sub>sed</sub><br>(µg/kg) | Entry<br>Route | PEC <sub>sw</sub><br>(µg/L) | PEC <sub>sed</sub><br>(µg/kg) | Entry<br>Route |
|-------------------------|----------|-----------------------------|-------------------------------|----------------|-----------------------------|-------------------------------|----------------|
|                         |          | Single application          |                               |                | Multiple application        |                               |                |
| Vegetables,<br>fruiting | D3 d     | 1.56                        | 0.708                         | drift          | 1.37                        | 0.972                         | drift          |
|                         | R2s      | 1.40                        | 67.6                          | drift          | 1.21                        | 109                           | drift          |
|                         | R3s      | 1.47                        | 22.6                          | drift          | 1.27                        | 43.6                          | drift          |
|                         | R4s      | 1.04                        | 9.50                          | drift          | 1.49                        | 19.6                          | run-off        |

### FOCUS Step 4 Global Maximum PEC<sub>sw</sub> for fludioxonil

| Application                            | Nozzle reduction | PEC <sub>sw</sub> (µg/L) | STEP 4 –Single application |       |       |       | STEP 4 –Multiple applications |       |       |       |       |       |       |
|----------------------------------------|------------------|--------------------------|----------------------------|-------|-------|-------|-------------------------------|-------|-------|-------|-------|-------|-------|
|                                        |                  | Vegetative strip (m)     | None                       |       |       |       | None                          |       |       |       |       |       | 10    |
|                                        |                  | No spray buffer (m)      | 0                          | 5     | 10    | 15    | 0                             | 5     | 10    | 15    | 20    | 30    | 10    |
| Vines,<br>late applications<br>BBCH 67 | None             | D6 d                     |                            | 5.160 | 1.870 | 1.200 |                               | 4.730 | 1.690 |       |       |       | -     |
|                                        |                  | R1 p                     |                            | 0.360 |       |       |                               | 0.496 |       |       |       |       |       |
|                                        |                  | R1 s                     |                            | 4.430 | 1.600 |       |                               | 4.010 | 1.440 |       |       |       |       |
|                                        |                  | R2 s                     |                            | 6.110 | 2.210 | 0.506 |                               | 5.380 | 1.930 | 1.040 |       |       |       |
|                                        |                  | R3 s                     |                            | 6.430 | 2.330 | 0.075 |                               | 5.660 | 2.030 | 1.450 |       |       |       |
|                                        |                  | R4 s                     |                            | 4.560 | 1.650 |       |                               | 4.010 | 2.180 | 2.180 | 2.180 | 2.180 | 1.440 |
|                                        | 50%              | D6 d                     | 4.04                       | 2.580 | 0.932 |       | 3.84                          | 2.360 | 0.845 |       |       |       | -     |
|                                        |                  | R1 p                     | 0.146                      | 0.185 |       |       | 0.176                         | 0.253 |       |       |       |       |       |
|                                        |                  | R1 s                     | 2.88                       | 2.220 | 0.801 |       | 2.61                          | 2.000 | 0.962 |       |       |       |       |
|                                        |                  | R2 s                     | 3.97                       | 3.050 | 1.110 |       | 3.50                          | 2.690 | 0.964 |       |       |       |       |
|                                        |                  | R3 s                     | 4.17                       | 3.210 | 1.160 |       | 3.68                          | 2.830 | 1.450 |       |       |       |       |
|                                        |                  | R4 s                     | 2.96                       | 2.280 | 0.980 |       | 2.61                          | 2.180 | 2.180 | 2.180 | 2.180 | 2.180 | 0.973 |

|      |       |       |       |       |       |       |       |       |       |       |       |       |  |
|------|-------|-------|-------|-------|-------|-------|-------|-------|-------|-------|-------|-------|--|
|      | 75%   | D6 d  | 2.02  | 1.290 |       |       | 1.92  | 1.180 |       |       |       |       |  |
|      |       | R1 p  | 0.074 | 0.097 |       |       | 0.090 | 0.133 |       |       |       |       |  |
|      |       | R1 s  | 1.44  | 1.110 |       |       | 1.31  | 1.000 |       |       |       |       |  |
|      |       | R2 s  | 1.99  | 1.530 |       |       | 1.75  | 1.340 |       |       |       |       |  |
|      |       | R3 s  | 2.09  | 1.600 |       |       | 1.84  | 1.450 |       |       |       |       |  |
|      | R4 s  | 1.48  | 1.140 |       |       | 1.31  | 2.180 | 2.180 | 2.180 | 2.180 | 2.180 | 0.973 |  |
|      | 90%   | D6 d  | 0.808 | 0.514 |       |       | 0.769 | 0.617 |       |       |       |       |  |
|      |       | R1 p  | 0.031 | 0.044 |       |       | 0.038 | 0.061 |       |       |       |       |  |
|      |       | R1 s  | 0.576 | 0.497 |       |       | 0.523 | 0.962 |       |       |       |       |  |
|      |       | R2 s  | 0.794 | 0.609 |       |       | 0.701 | 0.536 |       |       |       |       |  |
| R3 s |       | 0.835 | 0.641 |       |       | 0.737 | 1.450 |       |       |       |       |       |  |
| R4 s | 0.592 | 0.980 |       |       | 0.523 | 2.180 | 2.180 | 2.180 | 2.180 | 2.180 | 0.973 |       |  |

| Application                            | Nozzle reduction | PECsw (µg/L)         | STEP 4 –Single application |       |       |       | STEP 4 –Multiple applications |       |       |       |       |       |    |
|----------------------------------------|------------------|----------------------|----------------------------|-------|-------|-------|-------------------------------|-------|-------|-------|-------|-------|----|
|                                        |                  | Vegetative strip (m) | None                       |       |       |       | None                          |       |       |       |       |       | 10 |
|                                        |                  | No spray buffer (m)  | 0                          | 5     | 10    | 15    | 0                             | 5     | 10    | 15    | 20    | 30    | 10 |
| Vines, late applications Harvest - PHI | None             | D6 d                 |                            | 5.160 | 1.870 | 1.010 |                               | 4.720 | 2.040 | 2.040 | 2.040 | 2.040 | -  |
|                                        |                  | R1 p                 |                            | 0.358 |       |       |                               | 0.476 |       |       |       |       |    |
|                                        |                  | R1 s                 |                            | 4.560 | 1.650 |       |                               | 4.010 | 1.440 |       |       |       |    |
|                                        |                  | R2 s                 |                            | 6.110 | 2.210 | 1.200 |                               | 5.380 | 1.930 | 1.040 |       |       |    |
|                                        |                  | R3 s                 |                            | 6.430 | 2.330 | 1.260 |                               | 5.660 | 2.030 | 1.450 |       |       |    |
|                                        | R4 s             |                      | 4.560                      | 1.650 |       |       | 4.010                         | 2.180 | 2.180 | 2.180 | 2.180 | 1.440 |    |
|                                        | 50%              | D6 d                 | 4.04                       | 2.580 | 0.932 |       | 3.83                          | 2.360 | 2.040 | 2.040 | 2.040 | 2.040 |    |
|                                        |                  | R1 p                 | 0.145                      | 0.182 |       |       | 0.171                         | 0.241 |       |       |       |       |    |
|                                        |                  | R1 s                 | 2.96                       | 2.280 |       |       | 2.61                          | 2.000 | 0.900 |       |       |       |    |
|                                        |                  | R2 s                 | 3.97                       | 3.050 | 1.110 |       | 3.50                          | 2.690 | 0.964 |       |       |       |    |
|                                        |                  | R3 s                 | 4.17                       | 3.210 | 1.160 |       | 3.68                          | 2.830 | 1.450 |       |       |       |    |
|                                        | R4 s             | 2.96                 | 2.280                      |       |       | 2.61  | 2.180                         | 2.180 | 2.180 | 2.180 | 2.180 | 0.973 |    |
|                                        | 75%              | D6 d                 | 2.02                       | 1.290 |       |       | 1.91                          | 2.040 | 2.040 | 2.040 | 2.040 | 2.040 |    |
|                                        |                  | R1 p                 | 0.073                      | 0.095 |       |       | 0.086                         | 0.124 |       |       |       |       |    |
|                                        |                  | R1 s                 | 1.48                       | 1.140 |       |       | 1.31                          | 1.000 |       |       |       |       |    |
|                                        |                  | R2 s                 | 1.99                       | 1.530 |       |       | 1.75                          | 1.340 |       |       |       |       |    |
|                                        |                  | R3 s                 | 2.09                       | 1.600 |       |       | 1.84                          | 1.450 |       |       |       |       |    |
|                                        | R4 s             | 1.48                 | 1.140                      |       |       | 1.31  | 2.180                         | 2.180 | 2.180 | 2.180 | 2.180 | 0.973 |    |
|                                        | 90%              | D6 d                 | 0.808                      | 0.781 |       |       | 0.766                         | 2.040 | 2.040 | 2.040 | 2.040 | 2.040 |    |
|                                        |                  | R1 p                 | 0.030                      | 0.042 |       |       | 0.036                         | 0.056 |       |       |       |       |    |
| R1 s                                   |                  | 0.592                | 0.454                      |       |       | 0.523 | 0.900                         |       |       |       |       |       |    |
| R2 s                                   |                  | 0.794                | 0.609                      |       |       | 0.701 | 0.536                         |       |       |       |       |       |    |
| R3 s                                   |                  | 0.835                | 0.641                      |       |       | 0.737 | 1.450                         |       |       |       |       |       |    |
| R4 s                                   | 0.592            | 0.980                |                            |       | 0.523 | 2.180 | 2.180                         | 2.180 | 2.180 | 2.180 | 0.973 |       |    |

| Application                          | Nozzle reduction | PECsw (µg/L)         | STEP 4 –Single application |       |       |       | STEP 4 –Multiple applications |       |       |       |  |
|--------------------------------------|------------------|----------------------|----------------------------|-------|-------|-------|-------------------------------|-------|-------|-------|--|
|                                      |                  | Vegetative strip (m) | None                       |       |       |       | None                          |       |       |       |  |
|                                      |                  | No spray buffer (m)  | 0                          | 5     | 10    | 15    | 0                             | 5     | 10    | 15    |  |
| Pome/stone fruits, late applications | None             | D3 d                 |                            | 5.550 | 2.480 | 1.250 |                               | 4.550 | 2.190 | 1.070 |  |
|                                      |                  | D4 p                 |                            | 0.420 |       |       |                               | 0.600 |       |       |  |
|                                      |                  | D4 s                 |                            | 6.200 | 2.770 | 1.400 |                               | 5.060 | 2.430 | 1.190 |  |
|                                      |                  | D5 p                 |                            | 0.420 |       |       |                               | 0.636 |       |       |  |
|                                      |                  | D5 s                 |                            | 6.950 | 3.100 | 1.570 |                               | 5.680 | 2.720 | 1.330 |  |
|                                      |                  | R1 p                 |                            | 0.423 |       |       |                               | 0.636 |       |       |  |
|                                      |                  | R1 s                 |                            | 4.930 | 2.200 | 1.110 |                               | 4.020 | 1.930 | 0.944 |  |
|                                      |                  | R2 s                 |                            | 6.610 | 2.950 | 1.490 |                               | 5.390 | 2.590 | 1.270 |  |
|                                      | R3 s             |                      | 6.950                      | 3.100 | 1.570 |       | 5.670                         | 2.720 | 1.330 |       |  |
|                                      | R4 s             |                      | 4.930                      | 2.200 | 1.110 |       | 4.020                         | 1.930 | 1.220 |       |  |
|                                      | 50%              | D3 d                 | 3.89                       | 2.770 | 1.240 |       | 3.11                          | 2.280 | 1.090 |       |  |
|                                      |                  | D4 p                 | 0.174                      | 0.210 |       |       | 0.217                         | 0.298 |       |       |  |
|                                      |                  | D4 s                 | 3.76                       | 3.100 | 1.380 |       | 3.01                          | 2.530 | 1.210 |       |  |
|                                      |                  | D5 p                 | 0.174                      | 0.210 |       |       | 0.229                         | 0.318 |       |       |  |
| D5 s                                 |                  | 4.21                 | 3.470                      | 1.550 |       | 3.38  | 2.840                         | 1.360 |       |       |  |
| R1 p                                 |                  | 0.175                | 0.213                      |       |       | 0.229 | 0.321                         |       |       |       |  |

|  |      |      |       |       |       |  |       |       |       |  |  |
|--|------|------|-------|-------|-------|--|-------|-------|-------|--|--|
|  |      | R1 s | 2.99  | 2.460 | 1.100 |  | 2.39  | 2.010 | 0.964 |  |  |
|  |      | R2 s | 4.00  | 3.300 | 1.470 |  | 3.21  | 2.690 | 1.290 |  |  |
|  |      | R3 s | 4.21  | 3.470 | 1.550 |  | 3.37  | 2.830 | 1.360 |  |  |
|  |      | R4 s | 2.99  | 2.460 | 1.100 |  | 2.39  | 2.010 | 1.220 |  |  |
|  | 75%  | D3 d | 1.95  | 1.390 |       |  | 1.56  | 1.140 |       |  |  |
|  |      | D4 p | 0.087 | 0.105 |       |  | 0.108 | 0.148 |       |  |  |
|  |      | D4 s | 1.88  | 1.550 |       |  | 1.51  | 1.260 |       |  |  |
|  |      | D5 p | 0.087 | 0.105 |       |  | 0.115 | 0.159 |       |  |  |
|  |      | D5 s | 2.11  | 1.740 |       |  | 1.69  | 1.420 |       |  |  |
|  |      | R1 p | 0.088 | 0.108 |       |  | 0.115 | 0.164 |       |  |  |
|  |      | R1 s | 1.49  | 1.230 |       |  | 1.20  | 1.000 |       |  |  |
|  |      | R2 s | 2.00  | 1.650 |       |  | 1.60  | 1.350 |       |  |  |
|  |      | R3 s | 2.11  | 1.730 |       |  | 1.69  | 1.420 |       |  |  |
|  |      | R4 s | 1.49  | 1.230 |       |  | 1.20  | 1.220 |       |  |  |
|  |      | 90%  | D3 d  | 0.778 | 0.553 |  |       | 0.622 | 0.454 |  |  |
|  |      |      | D4 p  | 0.035 | 0.042 |  |       | 0.043 | 0.059 |  |  |
|  | D4 s |      | 0.752 | 0.618 |       |  | 0.603 | 0.505 |       |  |  |
|  | D5 p |      | 0.035 | 0.042 |       |  | 0.046 | 0.063 |       |  |  |
|  | D5 s |      | 0.843 | 0.693 |       |  | 0.676 | 0.566 |       |  |  |
|  | R1 p |      | 0.036 | 0.045 |       |  | 0.047 | 0.070 |       |  |  |
|  | R1 s |      | 0.598 | 0.491 |       |  | 0.479 | 0.500 |       |  |  |
|  | R2 s |      | 0.801 | 0.659 |       |  | 0.641 | 0.538 |       |  |  |
|  | R3 s |      | 0.842 | 0.693 |       |  | 0.675 | 0.565 |       |  |  |
|  | R4 s |      | 0.598 | 0.491 |       |  | 0.479 | 1.220 |       |  |  |

## Metabolites

### CGA192155

Parameters used in FOCUSsw step 1 and 2

Version control no. of FOCUS calculator:  
 Molecular weight (g/mol): 202.1  
 Water solubility (mg/L): 4900 at 25°C  
 K<sub>OC</sub>/K<sub>OM</sub> (mL/g): 18.67 (geomean, n=3)  
 DT<sub>50</sub> soil (d): 18.0 d (geometric mean, laboratory, n=3)  
 DT<sub>50</sub> water/sediment system (d): 1000 (default value)  
 Maximum occurrence observed  
 Total Water and Sediment: 17.3% AR (irradiated system)  
 Soil: 26.95 % (laboratory, soil photolysis)

See parent

See parent

Application rate A8207M

Application rate A8240D

| Crop                                 | Scenario                  | PEC <sub>SW</sub> (µg/L) | PEC <sub>SED</sub> (µg/kg) |
|--------------------------------------|---------------------------|--------------------------|----------------------------|
| Cereals                              | STEP 1                    | 0.573                    | 0.107                      |
|                                      | STEP 2 North EU (Oct-Feb) | 0.283                    | 0.053                      |
|                                      | STEP 2 South EU (Oct-Feb) | 0.226                    | 0.042                      |
| Vines, late applications             | STEP 1                    | 121                      | 22.5                       |
|                                      | STEP 2 North EU (Oct-Feb) | 20.9 (12.5)              | 3.89 (2.33)                |
|                                      | STEP 2 South EU (Oct-Feb) | 17.4 (10.4)              | 3.23 (1.93)                |
| Pome/stone fruits, late applications | STEP 1                    | 56.1                     | 10.4                       |
|                                      | STEP 2 North EU (Oct-Feb) | 10.3 (5.82)              | 1.92 (1.08)                |
|                                      | STEP 2 South EU (Oct-Feb) | 8.73 (4.98)              | 1.63 (0.93)                |
| Strawberries                         | STEP 1                    | 59.2                     | 11.0                       |
|                                      | STEP 2 North EU (Oct-Feb) | 7.76 (4.31)              | 1.45 (0.80)                |
|                                      | STEP 2 South EU (Oct-Feb) | 6.32 (3.51)              | 1.18 (0.66)                |

Single applications are presented in brackets

### MF2

Parameters used in FOCUSsw step 1 and 2

Version control no. of FOCUS calculator: Step 1-2 (v 3.2)  
 Molecular weight (g/mol): 248.2 (parent value)  
 Water solubility (mg/L): 1.8 (25°C, Parent Value)  
 K<sub>OC</sub>/K<sub>OM</sub> (mL/g): 0 (Default value for conservative PEC<sub>SW</sub>)  
 DT<sub>50</sub> soil (d): 1000 (default value)  
 DT<sub>50</sub> water/sediment system (d): 1000 (default value)  
 Maximum occurrence observed  
 Total Water and Sediment: 0% AR  
 Soil: 8.4% AR

See parent

See parent

Application rate A8207M

Application rate A8240D

| Crop                                 | Scenario                  | PEC <sub>SW</sub> (µg/L) | PEC <sub>SED</sub> (µg/kg) |
|--------------------------------------|---------------------------|--------------------------|----------------------------|
| Cereals                              | STEP 1                    | 0.350                    | <0.001                     |
|                                      | STEP 2 North EU (Oct-Feb) | 0.175                    | <0.001                     |
|                                      | STEP 2 South EU (Oct-Feb) | 0.140                    | <0.001                     |
| Vines, late applications             | STEP 1                    | 28.0                     | <0.001                     |
|                                      | STEP 2 North EU (Oct-Feb) | 5.54 (2.79)              | < 0.001 (<0.001)           |
|                                      | STEP 2 South EU (Oct-Feb) | 4.44 (2.23)              | < 0.001 (<0.001)           |
| Pome/stone fruits, late applications | STEP 1                    | 12.6                     | <0.001                     |
|                                      | STEP 2 North EU (Oct-Feb) | 2.19 (1.10)              | < 0.001 (<0.001)           |
|                                      | STEP 2 South EU (Oct-Feb) | 1.75 (0.88)              | < 0.001 (<0.001)           |
| Strawberries                         | STEP 1                    | 14.0                     | <0.001                     |
|                                      | STEP 2 North EU (Oct-Feb) | 2.09 (1.05)              | < 0.001 (<0.001)           |
|                                      | STEP 2 South EU (Oct-Feb) | 1.67 (0.84)              | < 0.001 (<0.001)           |

Single applications are presented in brackets

**CGA265378**

Parameters used in FOCUSsw step 1 and 2

|                                                                                                |
|------------------------------------------------------------------------------------------------|
| Version control no. of FOCUS calculator: Step 1-2 (v 3.2)                                      |
| Molecular weight (g/mol): 278.2                                                                |
| Water solubility (mg/L): 120 (25°C)                                                            |
| K <sub>OC</sub> /K <sub>OM</sub> (mL/g): 0 (Default value for conservative PEC <sub>sw</sub> ) |
| DT <sub>50</sub> soil (d): 0.11 d (geometric mean, laboratory, n=3)                            |
| DT <sub>50</sub> water/sediment system (d): 1000 (default value)                               |
| Maximum occurrence observed                                                                    |
| Total Water and Sediment: 0% AR                                                                |
| Soil: 10.1 % AR (soil photolysis study)                                                        |
| See parent                                                                                     |

Application rate A8240D

| Crop                                 | Scenario                  | PEC <sub>sw</sub> (µg/L) | PEC <sub>sed</sub> (µg/kg) |
|--------------------------------------|---------------------------|--------------------------|----------------------------|
| Vines, late applications             | STEP 1                    | 41.1                     | <0.001                     |
|                                      | STEP 2 North EU (Oct-Feb) | < 0.001 (< 0.001)        | < 0.001 (< 0.001)          |
|                                      | STEP 2 South EU (Oct-Feb) | < 0.001 (< 0.001)        | < 0.001 (< 0.001)          |
| Pome/stone fruits, late applications | STEP 1                    | 18.5                     | <0.001                     |
|                                      | STEP 2 North EU (Oct-Feb) | < 0.001 (< 0.001)        | < 0.001 (< 0.001)          |
|                                      | STEP 2 South EU (Oct-Feb) | < 0.001 (< 0.001)        | < 0.001 (< 0.001)          |
| Strawberries                         | STEP 1                    | 20.5                     | <0.001                     |
|                                      | STEP 2 North EU (Oct-Feb) | < 0.001 (< 0.001)        | < 0.001 (< 0.001)          |
|                                      | STEP 2 South EU (Oct-Feb) | < 0.001 (< 0.001)        | < 0.001 (< 0.001)          |

Single applications are presented in brackets

**CGA339833**

Parameters used in FOCUSsw step 1 and 2

|                                                                     |
|---------------------------------------------------------------------|
| Version control no. of FOCUS calculator: Step 1-2 (v 3.2)           |
| Molecular weight (g/mol): 312.2                                     |
| Water solubility (mg/L): 31000 at 25°C                              |
| K <sub>OC</sub> /K <sub>OM</sub> (mL/g): 2.3 (n=1)                  |
| DT <sub>50</sub> soil (d): 7.88 d (geometric mean, laboratory, n=3) |
| DT <sub>50</sub> water/sediment system (d): 1000 (default value)    |
| Maximum occurrence observed                                         |
| Total Water and Sediment: 3.8 % (irradiated system)                 |
| Soil: 13.4 % AR (soil photolysis study)                             |
| See parent                                                          |

Application rate A8240D

| Crop                                 | Scenario                  | PEC <sub>sw</sub> (µg/L) | PEC <sub>sed</sub> (µg/kg) |
|--------------------------------------|---------------------------|--------------------------|----------------------------|
| Vines, late applications             | STEP 1                    | 73.0                     | 1.68                       |
|                                      | STEP 2 North EU (Oct-Feb) | 8.71 (6.13)              | 0.200 (0.141)              |
|                                      | STEP 2 South EU (Oct-Feb) | 7.19 (5.03)              | 0.165 (0.116)              |
| Pome/stone fruits, late applications | STEP 1                    | 33.4                     | 0.767                      |
|                                      | STEP 2 North EU (Oct-Feb) | 4.47 (2.72)              | 0.103 (0.063)              |
|                                      | STEP 2 South EU (Oct-Feb) | 3.75 (2.29)              | 0.086 (0.053)              |
| Strawberries                         | STEP 1                    | 36.1                     | 0.829                      |
|                                      | STEP 2 North EU (Oct-Feb) | 3.44 (2.17)              | 0.079 (0.050)              |
|                                      | STEP 2 South EU (Oct-Feb) | 2.79 (1.76)              | 0.064 (0.040)              |

Single applications are presented in brackets

**SYN545245**

Parameters used in FOCUSsw step 1 and 2

|                                                                                                |
|------------------------------------------------------------------------------------------------|
| Version control no. of FOCUS calculator: Step 1-2 (v 3.2)                                      |
| Molecular weight (g/mol): 255.2                                                                |
| Water solubility (mg/L): 1.8 at 25°C (Parent value)                                            |
| K <sub>OC</sub> /K <sub>OM</sub> (mL/g): 0 (Default value for conservative PEC <sub>sw</sub> ) |
| DT <sub>50</sub> soil (d): 0.33 d (geometric mean, laboratory, n=3)                            |
| DT <sub>50</sub> water/sediment system (d): 1000 (default value)                               |
| Maximum occurrence observed                                                                    |
| Total Water and Sediment: 0 %                                                                  |
| Soil: 29.4 % AR (soil photolysis study)                                                        |
| See parent                                                                                     |

Application rate A8240D

| Crop                                 | Scenario                  | PEC <sub>sw</sub> (µg/L) | PEC <sub>sed</sub> (µg/kg) |
|--------------------------------------|---------------------------|--------------------------|----------------------------|
| Vines, late applications             | STEP 1                    | 101                      | < 0.001                    |
|                                      | STEP 2 North EU (Oct-Feb) | 0.002 (0.002)            | < 0.001 (<0.001)           |
|                                      | STEP 2 South EU (Oct-Feb) | 0.002 (0.002)            | < 0.001 (<0.001)           |
| Pome/stone fruits, late applications | STEP 1                    | 45.3                     | < 0.001                    |
|                                      | STEP 2 North EU (Oct-Feb) | 0.001 (0.001)            | < 0.001 (<0.001)           |
|                                      | STEP 2 South EU (Oct-Feb) | 0.001 (0.001)            | < 0.001 (<0.001)           |
| Strawberries                         | STEP 1                    | 50.4                     | < 0.001                    |
|                                      | STEP 2 North EU (Oct-Feb) | 0.001 (0.001)            | < 0.001 (<0.001)           |
|                                      | STEP 2 South EU (Oct-Feb) | 0.001 (0.001)            | < 0.001 (<0.001)           |

Single applications are presented in brackets

**D9**

Parameters used in FOCUSsw step 1 and 2

|                                                                                                |
|------------------------------------------------------------------------------------------------|
| Version control no. of FOCUS calculator: Step 1-2 (v 3.2)                                      |
| Molecular weight (g/mol): 248.2 (parent value)                                                 |
| Water solubility (mg/L): 1.8 at 25°C (Parent value)                                            |
| K <sub>OC</sub> /K <sub>OM</sub> (mL/g): 0 (Default value for conservative PEC <sub>sw</sub> ) |
| DT <sub>50</sub> soil (d): 1000 d (default value)                                              |
| DT <sub>50</sub> water/sediment system (d): 1000 (default value)                               |
| Maximum occurrence observed                                                                    |
| Total Water and Sediment: 0 %                                                                  |
| Soil: 6.9 % AR (soil photolysis study)                                                         |
| See parent                                                                                     |

Application rate A8240D

| Crop                                 | Scenario                  | PEC <sub>sw</sub> (µg/L) | PEC <sub>sed</sub> (µg/kg) |
|--------------------------------------|---------------------------|--------------------------|----------------------------|
| Vines, late applications             | STEP 1                    | 23.0                     | <0.001                     |
|                                      | STEP 2 North EU (Oct-Feb) | 4.55 (2.29)              | < 0.001 (<0.001)           |
|                                      | STEP 2 South EU (Oct-Feb) | 3.64 (1.83)              | < 0.001 (<0.001)           |
| Pome/stone fruits, late applications | STEP 1                    | 10.4                     | <0.001                     |
|                                      | STEP 2 North EU (Oct-Feb) | 1.80 (0.90)              | < 0.001 (<0.001)           |
|                                      | STEP 2 South EU (Oct-Feb) | 1.44 (0.72)              | < 0.001 (<0.001)           |
| Strawberries                         | STEP 1                    | 11.5                     | <0.001                     |
|                                      | STEP 2 North EU (Oct-Feb) | 1.74 (0.86)              | < 0.001 (<0.001)           |
|                                      | STEP 2 South EU (Oct-Feb) | 1.37 (0.69)              | < 0.001 (<0.001)           |

Single applications are presented in brackets

### Overall maximum PEC<sub>sed</sub> accumulation for all uses for fludioxonil

The Scientific Opinion on the effect assessment for pesticides on sediment organisms in edge-of-field surface water (EFSA Journal 2015;13(7):4176) recommends calculating the accumulation of active substances in sediment with the following formula:

$$PEC_{sed,accu} = PEC_{sed,FOCUS} + PEC_{sed,max,FOCUS} \frac{X}{1-X}$$

$$X = \exp\left(-\frac{365 \ln(2) f}{DegT50}\right) \quad f = \exp\left(\frac{-E}{R} \left[ \frac{1}{T_{arr,scen} + 273.15} - \frac{1}{T_0 + 273.15} \right]\right)$$

With

- PEC<sub>sed,accu</sub>: predicted sediment concentration including accumulation (µg/kg)
- PEC<sub>sed,FOCUS</sub>: predicted concentration in sediment according to FOCUS (µg/kg)
- PEC<sub>sed,max,FOCUS</sub>: maximum concentration in sediment according to FOCUS (µg/kg)
- f: temperature correction factor (–)
- DegT50 water/sediment system: degradation in water/sediment at reference temperature (days)
- T<sub>arr,scen</sub>: Arrhenius-weighted average concentration of the scenario (°C)
- To: Reference temperature during the degradation study (20 °C)
- E: Arrhenius activation energy, (kJ/mol)
- R: Gas constant (kJ/mol/K)

| Crop                                           | Scenario | Waterbody | Max PEC <sub>sed</sub> | PEC <sub>sed,accu</sub> |
|------------------------------------------------|----------|-----------|------------------------|-------------------------|
| Cereals seed treatment – STEP 2                | North    | -         | 12.2                   | 78.3                    |
| Vine (late application) BBCH 67 – STEP 3       | D6       | ditch     | 34.5                   | 107                     |
| Vine (late application) Harvest – PHI – STEP 3 | D6       | ditch     | 34.7                   | 108                     |
| Pome/stone fruit BBCH 74– STEP 3               | D3       | ditch     | 15.8                   | 78.9                    |
| Fruiting vegetables BBCH 61 – STEP 3           | R2       | stream    | 109                    | 414                     |

### Overall maximum initial PEC<sub>sw</sub> of CGA192155 following application of A8240D to protected strawberries – GEM soil-less scenarios

#### Input parameters related to application for PEC<sub>sw</sub> calculation in GEM

|                                                                                                      |                                                                              |
|------------------------------------------------------------------------------------------------------|------------------------------------------------------------------------------|
| Crop                                                                                                 | Strawberries                                                                 |
| Application rate (g as/ha)                                                                           | 250                                                                          |
| Number of applications/interval (d)                                                                  | 2 / 10                                                                       |
| Application method                                                                                   | Foliar spray application                                                     |
| Model used for calculation                                                                           | Greenhouse Emission Model v3.3.2                                             |
| Cultivation –Assessment type                                                                         | Soilless – surface water                                                     |
| Nutrient emission reference period                                                                   | 2015-2017 (without - filter water reused)<br>2015-2017 (filter water reused) |
| Manage application with regard to discharge + minimal interval between application and discharge (d) | No – 0 d (without - filter water reused)<br>Yes – 3 d (filter water reused)  |

Application selected within GEM for PEC<sub>sw</sub> of fludioxonil

| Crop / emission scenario                          | Month of application simulated | Date of first simulated application | Date of second simulated application |
|---------------------------------------------------|--------------------------------|-------------------------------------|--------------------------------------|
| Strawberries (2015-2017; filter water not reused) | November                       | 1/11                                | 10/11                                |
|                                                   | March                          | 1/3                                 | 11/3                                 |
|                                                   | August                         | 1/8                                 | 11/8                                 |
| Strawberries (2015-2017; filter water not reused) | November                       | 1/11                                | 10/11                                |
|                                                   | March                          | 4/3                                 | 14/3                                 |
|                                                   | August                         | 2/8                                 | 12/8                                 |

Input parameters related to **fludioxonil and CGA192155** for  $PEC_{sw/seed}$  calculations

| Parameter                                    | Substance                            | Remarks                                                                                                         |
|----------------------------------------------|--------------------------------------|-----------------------------------------------------------------------------------------------------------------|
| <b>fludioxonil</b>                           |                                      |                                                                                                                 |
| Molecular weight (g/mol)                     | 248.2                                | -                                                                                                               |
| Water solubility at 25°C (g/L)               | 1.80                                 |                                                                                                                 |
| Vapour pressure at 25°C (Pa)                 | $3.9 \times 10^{-7}$                 |                                                                                                                 |
| Octanol-water partitioning coefficient (-)   | Log Pow = 4.12                       |                                                                                                                 |
| $K_{FOC}$ (mL/g)                             | 80341                                | Geometric mean (n = 5)                                                                                          |
| $K_{FOM}$ (mL/g)                             | 46601                                | Calculated $K_{FOM} = K_{FOC} / 1.724$                                                                          |
| 1/n (-)                                      | 1.00                                 | Arithmetic mean (n = 5)                                                                                         |
| DT <sub>50</sub> water (d)                   | 1000                                 | FOCUS default                                                                                                   |
| DT <sub>50</sub> sediment (d)                | 547                                  | Geometric mean whole system (n = 2)                                                                             |
| DT <sub>50</sub> in recirculation water (d)  | 30.4                                 | Geometric mean (n = 2; Aerobic mineralization OECD 309)                                                         |
| DT <sub>50</sub> in disinfection tank (d)    | 30.4                                 | Geometric mean (n = 2; Aerobic mineralization OECD 309)                                                         |
| DT <sub>50</sub> in substrate (d)            | 134                                  | (Geometric mean, field, normalised to pF2 and 20°C, n = 6); no specific DT <sub>50</sub> in substrate available |
| DT <sub>50</sub> in greenhouse air (d)       | 0.15                                 | The photochemical oxidative degradation of fludioxonil in air was rapid, with a DT <sub>50</sub> value of 3.6 h |
| <b>CGA192155</b>                             |                                      |                                                                                                                 |
| Molecular weight (g/mol)                     | 202.1                                | -                                                                                                               |
| Water solubility at 25°C (g/L)               | 4900                                 |                                                                                                                 |
| Vapour pressure at 25°C (Pa)                 | 0                                    |                                                                                                                 |
| Octanol-water partitioning coefficient (-)   | Log P <sub>ow</sub> = 0.81 at pH 5.0 |                                                                                                                 |
| $K_{FOC}$ (mL/g)                             | 20.2                                 | Geometric mean (n = 5)                                                                                          |
| $K_{FOM}$ (mL/g)                             | 11.7                                 | Calculated $K_{FOM} = K_{FOC} / 1.724$                                                                          |
| 1/n (-)                                      | 0.80                                 | Arithmetic mean (n = 5)                                                                                         |
| DT <sub>50</sub> water (d)                   | 1000                                 | FOCUS default                                                                                                   |
| DT <sub>50</sub> sediment (d)                | 1000                                 | Geometric mean whole system (n = 2)                                                                             |
| Formation fraction from fludioxonil          | 0.173 (all compartments)             | Max observed = 17.3% *                                                                                          |
| DT <sub>50</sub> in recirculation water (d)  | 30.4                                 | Geometric mean (n = 2; Aerobic mineralization OECD 309)                                                         |
| DT <sub>50</sub> in disinfection tank (d)    | 30.4                                 | Geometric mean (n = 2; Aerobic mineralization OECD 309)                                                         |
| DT <sub>50</sub> in substrate (d)            | 18.0                                 | (Geometric mean, field, normalised to pF2 and 20°C, n = 6); no specific DT <sub>50</sub> in substrate available |
| DT <sub>50</sub> in greenhouse air (d)       | 1.0                                  | Conservative value                                                                                              |
| <b>Default values for both compounds</b>     |                                      |                                                                                                                 |
| DT <sub>50</sub> on the greenhouse floor (d) | 100                                  | Default value in GEM                                                                                            |
| Canopy process option                        | Lumped                               | Default value in GEM                                                                                            |
| DT <sub>50</sub> on crop canopy (d)          | 10                                   | Default value in GEM                                                                                            |

\* Although the formation fraction is always higher than the maximum observed percentage, as the value was used in all compartments (surface water/recirculation water/disinfection tank) it is considered conservative as the level of formation observed in irradiated water/sediment is unlikely to be replicated in the other two compartments

**50<sup>th</sup> centile  $PEC_{sw}$  for fludioxonil and CGA192155 following application to strawberries in a greenhouse in a soil-less system**

| Substance | with filter rinsing water | without filter rinsing water |
|-----------|---------------------------|------------------------------|
|-----------|---------------------------|------------------------------|



|                                                 | Application period | Date of maximum (in water) | 50 <sup>th</sup> centile PEC <sub>sw</sub> (µg/L) | Date of maximum (in water)             | 50 <sup>th</sup> centile PEC <sub>sw</sub> (µg/L) |
|-------------------------------------------------|--------------------|----------------------------|---------------------------------------------------|----------------------------------------|---------------------------------------------------|
| <b>50<sup>th</sup> centile PEC<sub>sw</sub></b> |                    |                            |                                                   |                                        |                                                   |
| fludioxonil                                     | November           | 08-Nov-2006                | 3.13                                              | 15-Dec-2004                            | 0.821                                             |
|                                                 | March              | 12-Apr-2005                | 16.4                                              | 03-Apr-2004                            | 5.20                                              |
|                                                 | August             | 16-Aug-2001                | 2.08                                              | 27-Aug-2003                            | 0.387                                             |
| CGA192155                                       | November           | 26-Feb-2004                | 1.27                                              | 20-Jan-2001                            | 0.578                                             |
|                                                 | March              | 28-Mar-2000                | 1.43                                              | 03-Apr-2004                            | 0.984                                             |
|                                                 | August             | 16-Aug-2001                | 0.127                                             | 26-Aug-2001                            | 0.080                                             |
| <b>with 90% end of pipe mitigation</b>          |                    |                            |                                                   | <b>with 70% end of pipe mitigation</b> |                                                   |
| fludioxonil                                     | November           | 08-Nov-2006                | 0.313                                             | 15-Dec-2004                            | 0.246                                             |
|                                                 | March              | 12-Apr-2005                | 1.64                                              | 03-Apr-2004                            | 1.56                                              |
|                                                 | August             | 16-Aug-2001                | 0.208                                             | 27-Aug-2003                            | 0.116                                             |
| CGA192155                                       | November           | 26-Feb-2004                | 0.127                                             | 26-Aug-2001                            | 0.024                                             |
|                                                 | March              | 28-Mar-2000                | 0.143                                             | 03-Apr-2004                            | 0.293                                             |
|                                                 | August             | 16-Aug-2001                | 0.013                                             | 20-Jan-2001                            | 0.172                                             |

**Estimation of concentrations from other routes of exposure (Regulation (EU) N° 284/2013, Annex Part A, point 9.4)**

Method of calculation

Not expected

**PEC**

Maximum concentration

Not expected

## Ecotoxicology

### Effects on birds and other terrestrial vertebrates (Regulation (EU) N° 283/2013, Annex Part A, point 8.1 and Regulation (EU) N° 284/2013, Annex Part A, point 10.1)

| Species                                                                                                                                                                                                                                                                                                                                                                                                                                                                                                                                                                                                                                                                                                                                                                                                                                                                                                                                                                                                                                                                                                                                                                                                                                                                                                                                                                                                                                                                                               | Test substance      | Time scale | End point                     | Toxicity (mg/kg bw per day) |
|-------------------------------------------------------------------------------------------------------------------------------------------------------------------------------------------------------------------------------------------------------------------------------------------------------------------------------------------------------------------------------------------------------------------------------------------------------------------------------------------------------------------------------------------------------------------------------------------------------------------------------------------------------------------------------------------------------------------------------------------------------------------------------------------------------------------------------------------------------------------------------------------------------------------------------------------------------------------------------------------------------------------------------------------------------------------------------------------------------------------------------------------------------------------------------------------------------------------------------------------------------------------------------------------------------------------------------------------------------------------------------------------------------------------------------------------------------------------------------------------------------|---------------------|------------|-------------------------------|-----------------------------|
| <b>Birds</b>                                                                                                                                                                                                                                                                                                                                                                                                                                                                                                                                                                                                                                                                                                                                                                                                                                                                                                                                                                                                                                                                                                                                                                                                                                                                                                                                                                                                                                                                                          |                     |            |                               |                             |
| <i>Colinus virginianus</i>                                                                                                                                                                                                                                                                                                                                                                                                                                                                                                                                                                                                                                                                                                                                                                                                                                                                                                                                                                                                                                                                                                                                                                                                                                                                                                                                                                                                                                                                            | Fludioxonil         | Acute      | LD <sub>50</sub>              | > 2000                      |
| <i>Colinus virginianus</i>                                                                                                                                                                                                                                                                                                                                                                                                                                                                                                                                                                                                                                                                                                                                                                                                                                                                                                                                                                                                                                                                                                                                                                                                                                                                                                                                                                                                                                                                            | Fludioxonil         | Short-term | LD <sub>50</sub>              | > 833                       |
| <i>Anas platyrhynchos</i>                                                                                                                                                                                                                                                                                                                                                                                                                                                                                                                                                                                                                                                                                                                                                                                                                                                                                                                                                                                                                                                                                                                                                                                                                                                                                                                                                                                                                                                                             | Fludioxonil         | Short-term | LD <sub>50</sub>              | > 1191                      |
| <i>Serinus canaria</i>                                                                                                                                                                                                                                                                                                                                                                                                                                                                                                                                                                                                                                                                                                                                                                                                                                                                                                                                                                                                                                                                                                                                                                                                                                                                                                                                                                                                                                                                                | Fludioxonil         | Short-term | LD <sub>50</sub>              | 183.8                       |
| Geometric mean (3 species, short-term)                                                                                                                                                                                                                                                                                                                                                                                                                                                                                                                                                                                                                                                                                                                                                                                                                                                                                                                                                                                                                                                                                                                                                                                                                                                                                                                                                                                                                                                                | Fludioxonil         | Short-term | Geomean LD <sub>50</sub>      | <b>567</b>                  |
| <i>Colinus virginianus</i>                                                                                                                                                                                                                                                                                                                                                                                                                                                                                                                                                                                                                                                                                                                                                                                                                                                                                                                                                                                                                                                                                                                                                                                                                                                                                                                                                                                                                                                                            | Fludioxonil         | Long-term  | NOAEL                         | 65 <sup>1</sup>             |
| <i>Colinus virginianus</i>                                                                                                                                                                                                                                                                                                                                                                                                                                                                                                                                                                                                                                                                                                                                                                                                                                                                                                                                                                                                                                                                                                                                                                                                                                                                                                                                                                                                                                                                            | Fludioxonil         | Long-term  | NOAEL                         | 432 <sup>1</sup>            |
| <i>Colinus virginianus</i>                                                                                                                                                                                                                                                                                                                                                                                                                                                                                                                                                                                                                                                                                                                                                                                                                                                                                                                                                                                                                                                                                                                                                                                                                                                                                                                                                                                                                                                                            | Fludioxonil         | Long-term  | NOAEL                         | 384 <sup>1</sup>            |
| <i>Anas platyrhynchos</i>                                                                                                                                                                                                                                                                                                                                                                                                                                                                                                                                                                                                                                                                                                                                                                                                                                                                                                                                                                                                                                                                                                                                                                                                                                                                                                                                                                                                                                                                             | Fludioxonil         | Long-term  | NOAEL                         | <b>134<sup>1</sup></b>      |
| <b>Mammals</b>                                                                                                                                                                                                                                                                                                                                                                                                                                                                                                                                                                                                                                                                                                                                                                                                                                                                                                                                                                                                                                                                                                                                                                                                                                                                                                                                                                                                                                                                                        |                     |            |                               |                             |
| Rat                                                                                                                                                                                                                                                                                                                                                                                                                                                                                                                                                                                                                                                                                                                                                                                                                                                                                                                                                                                                                                                                                                                                                                                                                                                                                                                                                                                                                                                                                                   | Fludioxonil         | Acute      | LD <sub>50</sub>              | > <b>5000</b>               |
| Rat                                                                                                                                                                                                                                                                                                                                                                                                                                                                                                                                                                                                                                                                                                                                                                                                                                                                                                                                                                                                                                                                                                                                                                                                                                                                                                                                                                                                                                                                                                   | A8240B <sup>2</sup> | Acute      | LD <sub>50</sub>              | > 2000                      |
| Rat                                                                                                                                                                                                                                                                                                                                                                                                                                                                                                                                                                                                                                                                                                                                                                                                                                                                                                                                                                                                                                                                                                                                                                                                                                                                                                                                                                                                                                                                                                   | A8207M              | Acute      | LD <sub>50</sub>              | > 5000                      |
| Rat                                                                                                                                                                                                                                                                                                                                                                                                                                                                                                                                                                                                                                                                                                                                                                                                                                                                                                                                                                                                                                                                                                                                                                                                                                                                                                                                                                                                                                                                                                   | Fludioxonil         | Long-term  | NOAEL<br>[2-generation study] | <b>58</b>                   |
| <p>Endocrine disrupting properties (Annex Part A, points 8.1.5)</p> <p>The pattern of EAS-mediated adversity identified in mammalian studies was considered relevant at the level of population and thus also adverse for wild mammals.</p> <p>For non-mammalian species, the following data were available:</p> <ol style="list-style-type: none"> <li>1. Amphibian Metamorphosis Assay according to OECD TG 231;</li> <li>2. Fish Short-Term Reproduction Assay according to OECD TG 229</li> <li>3. Fish Sexual development Test according to OECD TG 234</li> <li>4. Fish Full life cycle toxicity test according to USEPA 850.1500.</li> </ol> <p>While the AMA is relevant for the investigation of the ED properties of fludioxonil through the T-modality, the other studies are relevant for the EAS-modalities.</p> <p>Overall, the experts agreed that the effects observed in the AMA are more likely attributable to systemic toxicity and therefore concluded that the study did not show a pattern showing interference with the HPT axis.</p> <p>The available fish studies, as reported above, showed all a consistent pattern of effects, change in female gonad histopathology, reduced secondary sex characteristics in males, reduced fecundity.</p> <p>When considering all the mammalian and non-mammalian data together, the experts agreed that there was a clear pattern of adversity and endocrine activity across species and taxa suggesting an anti-androgenic MoA.</p> |                     |            |                               |                             |

|                                                                                                                                                                                                                                                                                                                                                                                                                                                                                |
|--------------------------------------------------------------------------------------------------------------------------------------------------------------------------------------------------------------------------------------------------------------------------------------------------------------------------------------------------------------------------------------------------------------------------------------------------------------------------------|
| <p>Additional higher tier studies (Annex Part A, points 10.1.1.2):</p> <ul style="list-style-type: none"> <li>- Residue data in pome fruits: <ul style="list-style-type: none"> <li>Southern and Northern Europe: <math>RUD_m = 1.34</math> mg fludioxonil/kg</li> </ul> </li> <li>- Residue decline in treated cereal seeds: <ul style="list-style-type: none"> <li>Geomean <math>DT_{50} = 6.93</math> days</li> </ul> </li> <li>- PT woodmouse in cereal = 0.716</li> </ul> |
| <p>Terrestrial vertebrate wildlife (birds, mammals, reptile and amphibians) (Annex Part A, points 8.1.4, 10.1.3):</p> <p><i>No relevant data are available from open literature.</i></p>                                                                                                                                                                                                                                                                                       |

Values in **bold** are used for TER calculation

<sup>1</sup> highest dose tested

<sup>2</sup> formulation variant equivalent to A8240D

### Toxicity/exposure ratios for terrestrial vertebrates (Regulation (EU) N° 284/2013, Part A, Annex point 10.1)

#### A8240D: Grapes at 500 g a.s./ha [2 applications]

| Growth stage                                              | Indicator or focal species | Time scale | DDD (mg/kg bw per day) | TER         | Trigger |
|-----------------------------------------------------------|----------------------------|------------|------------------------|-------------|---------|
| <b>Screening Step (Birds)</b>                             |                            |            |                        |             |         |
| All                                                       | Small omnivorous birds     | Acute      | 57.2                   | <b>9.9</b>  | 10      |
| All                                                       | Small omnivorous birds     | Long-term  | 14.4                   | 9.3         | 5       |
| <b>Tier 1 (Birds)</b>                                     |                            |            |                        |             |         |
| BBCH $\geq 20$                                            | Small insectivorous birds  | Acute      | 15.42                  | 37.0        | 10      |
| BBCH $\geq 40$                                            | Small granivorous bird     | Acute      | 4.44                   | 127.7       | 10      |
| BBCH $\geq 40$                                            | Small omnivorous bird      | Acute      | 4.32                   | 131.3       | 10      |
| Ripening                                                  | Frugivorous bird           | Acute      | 17.34                  | 32.7        | 10      |
| Higher tier (birds): Not required.                        |                            |            |                        |             |         |
| <b>Screening Step (Mammals)</b>                           |                            |            |                        |             |         |
| All                                                       | Small herbivorous mammal   | Acute      | 75.02                  | > 66.5      | 10      |
| All                                                       | Small herbivorous mammal   | Long-term  | 22.99                  | <b>2.52</b> | 5       |
| <b>Tier 1 (Mammals)</b>                                   |                            |            |                        |             |         |
| BBCH >20                                                  | Small insectivorous mammal | Long-term  | 0.60                   | 96.67       | 5       |
| BBCH >40                                                  | Large herbivorous mammal   | Long-term  | 1.05                   | 55.24       | 5       |
| Crop directed BBCH >40                                    | Small herbivorous mammal   | Long-term  | 6.90                   | 8.41        | 5       |
| Crop directed BBCH >40                                    | Small omnivorous mammal    | Long-term  | 0.73                   | 79.45       | 5       |
| <b>Risk from bioaccumulation and food chain behaviour</b> |                            |            |                        |             |         |
| Indicator or focal species                                |                            | Time scale | DDD (mg/kg bw per day) | TER         | Trigger |
| Earthworm-eating birds                                    |                            | Long-term  | 0.231                  | 580         | 5       |
| Earthworm-eating mammals                                  |                            | Long-term  | 0.282                  | 205.7       | 5       |
| Fish-eating birds                                         |                            | Long-term  | 0.0739                 | 1800        | 5       |
| Fish-eating mammals                                       |                            | Long-term  | 0.0660                 | 879         | 5       |
| Higher tier: Not required.                                |                            |            |                        |             |         |
| <b>Risk from consumption of contaminated water</b>        |                            |            |                        |             |         |

| Growth stage                                                                                     | Indicator or focal species | Time scale | DDD (mg/kg bw per day) | TER | Trigger |
|--------------------------------------------------------------------------------------------------|----------------------------|------------|------------------------|-----|---------|
| <b>Puddle scenario, Screening step</b>                                                           |                            |            |                        |     |         |
| Application rate (g a.s./ha)/relevant endpoint <3000 (Koc≥500 L/kg), TER calculation not needed. |                            |            |                        |     |         |

**A8240D: Orchards (Pome) at 225 g a.s./ha [2 applications]**

| Growth stage                                                                                     | Indicator or focal species | Time scale | DDD (mg/kg bw per day) | TER         | Trigger |
|--------------------------------------------------------------------------------------------------|----------------------------|------------|------------------------|-------------|---------|
| Screening Step (Birds)                                                                           |                            |            |                        |             |         |
| All                                                                                              | Small insectivorous birds  | Acute      | 14.7                   | 38.6        | 10      |
| All                                                                                              | Small insectivorous birds  | Long-term  | 3.47                   | 39          | 5       |
| Tier 1 (Birds)                                                                                   |                            |            |                        |             |         |
| Higher tier (birds): Not required.                                                               |                            |            |                        |             |         |
| Screening Step (Mammals)                                                                         |                            |            |                        |             |         |
| All                                                                                              | Small herbivorous mammal   | Acute      | 43                     | > 120       | 10      |
| All                                                                                              | Small herbivorous mammal   | Long-term  | 13.8                   | <b>4.20</b> | 5       |
| Tier 1 (Mammals)                                                                                 |                            |            |                        |             |         |
| Crop directed BBCH >40                                                                           | Small herbivorous mammal   | Long-term  | 4.14                   | 14.01       | 5       |
| Crop directed BBCH >40                                                                           | Large herbivorous mammal   | Long-term  | 0.82                   | 70.73       | 5       |
| Crop directed BBCH >40                                                                           | Small omnivorous mammal    | Long-term  | 0.44                   | 131.82      | 5       |
| Fruit stage                                                                                      | Small frugivorous mammal   | Long-term  | 4.33                   | 13.39       | 5       |
| <b>Risk from bioaccumulation and food chain behaviour</b>                                        |                            |            |                        |             |         |
| Indicator or focal species                                                                       |                            | Time scale | DDD (mg/kg bw per day) | TER         | Trigger |
| Earthworm-eating birds                                                                           |                            | Long-term  | 0.089                  | 1506        | 5       |
| Earthworm-eating mammals                                                                         |                            | Long-term  | 0.109                  | 532.1       | 5       |
| Fish-eating birds                                                                                |                            | Long-term  | 0.0466                 | 2900        | 5       |
| Fish-eating mammals                                                                              |                            | Long-term  | 0.0416                 | 1394        | 5       |
| Higher tier: Not required.                                                                       |                            |            |                        |             |         |
| <b>Risk from consumption of contaminated water</b>                                               |                            |            |                        |             |         |
| <b>Puddle scenario, Screening step</b>                                                           |                            |            |                        |             |         |
| Application rate (g a.s./ha)/relevant endpoint <3000 (Koc≥500 L/kg), TER calculation not needed. |                            |            |                        |             |         |

**A8240D: Strawberry at 250 g a.s./ha [2 applications]**

| Growth stage           | Indicator or focal species | Time scale | DDD (mg/kg bw per day) | TER | Trigger |
|------------------------|----------------------------|------------|------------------------|-----|---------|
| Screening Step (Birds) |                            |            |                        |     |         |
| All                    | Small omnivorous bird      | Acute      | 51.6                   | 11  | 10      |

| Growth stage                                                                                     | Indicator or focal species | Time scale | DDD (mg/kg bw per day) | TER    | Trigger |
|--------------------------------------------------------------------------------------------------|----------------------------|------------|------------------------|--------|---------|
| All                                                                                              | Small omnivorous bird      | Long-term  | 12.9                   | 10     | 5       |
| Tier 1 (Birds)                                                                                   |                            |            |                        |        |         |
| Higher tier (birds): Not required.                                                               |                            |            |                        |        |         |
| Screening Step (Mammals)                                                                         |                            |            |                        |        |         |
| All                                                                                              | Small herbivorous mammal   | Acute      | 38.5                   | > 130  | 10      |
| All                                                                                              | Small herbivorous mammal   | Long-term  | 9.60                   | 6.04   | 5       |
| Tier 1 (Mammals)                                                                                 |                            |            |                        |        |         |
| BBCH>20                                                                                          | Small insectivorous mammal | Long-term  | 0.38                   | 152.63 | 5       |
| BBCH >40                                                                                         | Small herbivorous mammal   | Long-term  | 5.74                   | 10.10  | 5       |
| BBCH >40                                                                                         | Large herbivorous mammal   | Long-term  | 1.13                   | 51.33  | 5       |
| BBCH >40                                                                                         | Small omnivorous mammal    | Long-term  | 0.62                   | 93.55  | 5       |
| <b>Risk from bioaccumulation and food chain behaviour</b>                                        |                            |            |                        |        |         |
| Indicator or focal species                                                                       |                            | Time scale | DDD (mg/kg bw per day) | TER    | Trigger |
| Earthworm-eating birds                                                                           |                            | Long-term  | 0.056                  | 2393   | 5       |
| Earthworm-eating mammals                                                                         |                            | Long-term  | 0.068                  | 852.9  | 5       |
| Fish-eating birds                                                                                |                            | Long-term  | 0.0187                 | 7166   | 5       |
| Fish-eating mammals                                                                              |                            | Long-term  | 0.0167                 | 3473   | 5       |
| Higher tier : Not required.                                                                      |                            |            |                        |        |         |
| <b>Risk from consumption of contaminated water</b>                                               |                            |            |                        |        |         |
| <b>Puddle scenario, Screening step</b>                                                           |                            |            |                        |        |         |
| Application rate (g a.s./ha)/relevant endpoint <3000 (Koc≥500 L/kg), TER calculation not needed. |                            |            |                        |        |         |

**A8207M: Treated cereals seed at 12.5 g a.s./ha (50 mg a.s./kg seed) (worst-case scenario)**

|                                         | Indicator or focal species | Time scale | DDD (mg/kg bw per day) | TER  | Trigger |
|-----------------------------------------|----------------------------|------------|------------------------|------|---------|
| Screening Step (Birds)                  |                            |            |                        |      |         |
| <i>Not relevant for seed treatment.</i> |                            |            |                        |      |         |
| Tier 1 (Birds)                          |                            |            |                        |      |         |
| BBCH 00                                 | Small granivorous bird     | Acute      | 15                     | 37.8 | 10      |
| BBCH 00                                 | Small granivorous bird     | Long-term  | 15                     | 8.93 | 5       |
| Higher tier (birds): Not required.      |                            |            |                        |      |         |
| Screening Step (Mammals)                |                            |            |                        |      |         |
| <i>Not relevant for seed treatment.</i> |                            |            |                        |      |         |

|                                                                                                  | Indicator or focal species | Time scale | DDD (mg/kg bw per day) | TER   | Trigger |
|--------------------------------------------------------------------------------------------------|----------------------------|------------|------------------------|-------|---------|
| <b>Tier 1 (Mammals)</b>                                                                          |                            |            |                        |       |         |
| BBCH 00                                                                                          | Small omnivorous mammal    | Acute      | 12                     | > 420 | 10      |
| BBCH 00                                                                                          | Small omnivorous mammal    | Long-term  | 5.04*                  | 11.51 | 5       |
| <b>Higher tier (Mammals): PT = 0.716</b>                                                         |                            |            |                        |       |         |
| BBCH 00                                                                                          | Small omnivorous mammal    | Long-term  | 3.609                  | 5.37  | 5       |
| <b>Risk from bioaccumulation and food chain behaviour</b>                                        |                            |            |                        |       |         |
|                                                                                                  | Indicator or focal species | Time scale | DDD (mg/kg bw per day) | TER   | Trigger |
|                                                                                                  | Earthworm-eating birds     | Long-term  | 0.0034                 | 39412 | 5       |
|                                                                                                  | Earthworm-eating mammals   | Long-term  | 0.0041                 | 14146 | 5       |
|                                                                                                  | Fish-eating birds          | Long-term  | 0.00221                | 61000 | 5       |
|                                                                                                  | Fish-eating mammals        | Long-term  | 0.00200                | 29000 | 5       |
| Higher tier: Not required.                                                                       |                            |            |                        |       |         |
| <b>Risk from consumption of contaminated water</b>                                               |                            |            |                        |       |         |
| <b>Puddle scenario, Screening step</b>                                                           |                            |            |                        |       |         |
| Application rate (g a.s./ha)/relevant endpoint <3000 (Koc≥500 L/kg), TER calculation not needed. |                            |            |                        |       |         |

\* Based on a DT50 of 6.93. See experts' consultation 5.2 of the Pesticides Peer Review Experts' Meeting PREV 03 (EFSA, 2024)

**Toxicity data for all aquatic tested species (Regulation (EU) N° 283/2013, Annex Part A, points 8.2 and Regulation (EU) N° 284/2013 Annex Part A, point 10.2)**

| Group                                                            | Test substance | Time-scale<br>(Test type)     | End point                          | Toxicity <sup>1</sup>                                               |
|------------------------------------------------------------------|----------------|-------------------------------|------------------------------------|---------------------------------------------------------------------|
| Laboratory tests                                                 |                |                               |                                    |                                                                     |
| <b>Fish</b>                                                      |                |                               |                                    |                                                                     |
| <i>Oncorhynchus mykiss</i>                                       | Fludioxonil    | Acute 96 hr<br>(flow-through) | Mortality, LC <sub>50</sub>        | 0.23 mg a.s./L <sub>(mm)</sub>                                      |
| <i>Oncorhynchus mykiss</i>                                       | Fludioxonil    | Acute 96 hr<br>(flow-through) | Mortality, LC <sub>50</sub>        | 0.47 mg a.s./L <sub>(mm)</sub>                                      |
| <i>Oncorhynchus mykiss</i><br>(formerly <i>Salmo gairdneri</i> ) | Fludioxonil    | Acute 96 hr<br>(static)       | Mortality, LC <sub>50</sub>        | 0.50 mg a.s./L <sub>(mm)</sub>                                      |
| Geometric mean<br>( <i>Oncorhynchus mykiss</i> , acute)          | Fludioxonil    | Acute                         | Geomean LC <sub>50</sub>           | 0.38 mg a.s./L                                                      |
| <i>Lepomis macrochirus</i>                                       | Fludioxonil    | Acute 96 hr<br>(flow-through) | Mortality, LC <sub>50</sub>        | 0.74 mg a.s./L <sub>(mm)</sub>                                      |
| <i>Cyprinodon variegatus</i>                                     | Fludioxonil    | Acute 96 hr<br>(flow-through) | Mortality, LC <sub>50</sub>        | 1.2 mg a.s./L <sub>(mm)</sub>                                       |
| <i>Cyprinodon variegatus</i>                                     | Fludioxonil    | Acute 96 hr<br>(flow-through) | Mortality, LC <sub>50</sub>        | 0.54 mg a.s./L <sub>(mm)</sub>                                      |
| Geometric mean<br>( <i>Cyprinodon variegatus</i> , acute)        | Fludioxonil    | Acute                         | Geomean LC <sub>50</sub>           | 0.80 mg a.s./L                                                      |
| <i>Pimephales promelas</i>                                       | Fludioxonil    | Acute 96 hr<br>(semi-static)  | Mortality, LC <sub>50</sub>        | 0.70 mg a.s./L <sub>(mm)</sub>                                      |
| Geometric mean<br>(4 species, acute)                             | Fludioxonil    | Acute                         | Geomean LC <sub>50</sub>           | <b>0.63</b> mg a.s./L                                               |
| <i>Rana limnocharis</i>                                          | Fludioxonil    | Acute 48 hr<br>(static)       | Mortality, LC <sub>50</sub>        | 2.32 mg a.s./L <sub>(nom)</sub>                                     |
| <i>Oncorhynchus mykiss</i>                                       | Fludioxonil    | Chronic<br>(flow-through)     | Growth, NOEC                       | 0.040 mg a.s./L <sub>(mm)</sub>                                     |
| <i>Pimephales promelas</i>                                       | Fludioxonil    | Chronic<br>(flow-through)     | ELS, NOEC<br>ELS, EC <sub>10</sub> | 0.039 mg a.s./L <sub>(mm)</sub><br>0.0344 mg a.s./L <sub>(mm)</sub> |
| <i>Pimephales promelas</i>                                       | Fludioxonil    | Chronic<br>(flow-through)     | ELS, NOEC                          | 0.019 mg a.s./L <sub>(mm)</sub>                                     |
| <i>Cyprinodon variegatus</i>                                     | Fludioxonil    | Chronic<br>(flow-through)     | ELS, NOEC                          | 0.1 mg a.s./L <sub>(nom)</sub>                                      |
| <i>Cyprinodon variegatus</i>                                     | Fludioxonil    | Chronic<br>(flow-through)     | ELS, NOEC                          | 0.038 mg a.s./L <sub>(mm)</sub>                                     |
| <i>Pimephales promelas</i>                                       | Fludioxonil    | Chronic<br>(flow-through)     | Full LC, NOEC                      | <b>0.018</b> mg a.s./L <sub>(twmm)</sub>                            |
| <i>Oncorhynchus mykiss</i>                                       | CGA192155      | Acute 96 hr<br>(static)       | Mortality, LC <sub>50</sub>        | > <b>100</b> mg met./L <sub>(nom)</sub>                             |
| <i>Oncorhynchus mykiss</i>                                       | CGA339833      | Acute 96 hr<br>(static)       | Mortality, LC <sub>50</sub>        | > <b>100</b> mg met./L <sub>(nom)</sub>                             |
| <i>Oncorhynchus mykiss</i>                                       | CGA265378      | Acute 96 hr                   | Mortality, LC <sub>50</sub>        | <b>0.038</b> mg met./L <sup>4</sup>                                 |

| Group                                                    | Test substance | Time-scale<br>(Test type) | End point                   | Toxicity <sup>1</sup>                                                            |
|----------------------------------------------------------|----------------|---------------------------|-----------------------------|----------------------------------------------------------------------------------|
| <i>Oncorhynchus mykiss</i>                               | SYN545245      | Acute 96 hr               | Mortality, LC <sub>50</sub> | <b>0.038</b> mg met./L <sup>4</sup>                                              |
| <i>Oncorhynchus mykiss</i>                               | D9             | Acute 96 hr               | Mortality, LC <sub>50</sub> | <b>0.038</b> mg met./L <sup>4</sup>                                              |
| <i>Oncorhynchus mykiss</i>                               | MF2            | Acute 96 hr               | Mortality, LC <sub>50</sub> | <b>0.038</b> mg met./L <sup>4</sup>                                              |
| <b>Aquatic invertebrates</b>                             |                |                           |                             |                                                                                  |
| <i>Daphnia magna</i>                                     | Fludioxonil    | 48 h<br>(flow-through)    | Mortality, EC <sub>50</sub> | 0.40 mg a.s./L (mm)                                                              |
| <i>Daphnia magna</i>                                     | Fludioxonil    | 48 h<br>(flow-through)    | Mortality, EC <sub>50</sub> | 0.90 mg a.s./L (mm)                                                              |
| Geometric mean<br>( <i>Daphnia magna</i> , acute)        | Fludioxonil    | Acute                     | Geomean EC <sub>50</sub>    | 0.60 mg a.s./L                                                                   |
| <i>Americamysis bahia</i>                                | Fludioxonil    | 96 h<br>(flow-through)    | Mortality, EC <sub>50</sub> | 0.27 mg a.s./L (mm)                                                              |
| Geometric mean<br>(2 species, acute)                     | Fludioxonil    | Acute                     | Geomean EC <sub>50</sub>    | <b>0.402</b> mg a.s./L                                                           |
| <i>Daphnia magna</i>                                     | A8207M         | 48 h<br>(static)          | Mortality, EC <sub>50</sub> | 24.6 mg prep./L <sub>(ini meas)</sub><br>(0.615 mg a.s./L) <sub>(ini meas)</sub> |
| <i>Crassostrea virginica</i>                             | Fludioxonil    | 96 h<br>(shell growth)    | Mortality, EC <sub>50</sub> | 0.37 mg a.s./L (mm)                                                              |
| <i>Daphnia magna</i>                                     | Fludioxonil    | 21 d<br>(semi-static)     | Full LC, NOEC               | 0.035 mg a.s./L (mm)                                                             |
| <i>Daphnia magna</i>                                     | Fludioxonil    | 21 d<br>(flow-through)    | Full LC, NOEC               | 0.019 mg a.s./L (mm) <sup>6</sup>                                                |
| <i>Americamysis bahia</i>                                | Fludioxonil    | 28 d<br>(flow-through)    | Full LC, NOEC               | 0.018 mg a.s./L (mm)                                                             |
| <i>Americamysis bahia</i>                                | Fludioxonil    | 28 d<br>(flow-through)    | Full LC, NOEC               | <b>0.024</b> mg a.s./L (twm)                                                     |
| <i>Daphnia magna</i>                                     | CGA192155      | 48 h (static)             | Mortality, EC <sub>50</sub> | > <b>100</b> mg met./L (nom)                                                     |
| <i>Daphnia magna</i>                                     | CGA265378      | 48 h (static)             | Mortality, EC <sub>50</sub> | <b>0.040</b> mg met./L <sup>3</sup>                                              |
| <i>Daphnia magna</i>                                     | CGA339833      | 48 h (static)             | Mortality, EC <sub>50</sub> | > <b>100</b> mg met./L (nom)                                                     |
| <i>Daphnia magna</i>                                     | CGA344623      | 48 h (static)             | Mortality, EC <sub>50</sub> | > <b>100</b> mg met./L (nom)                                                     |
| <i>Americamysis bahia</i>                                | D9             | 48 h (static)             | Mortality, EC <sub>50</sub> | <b>0.027</b> mg met./L <sup>3</sup>                                              |
| <i>Americamysis bahia</i>                                | MF2            | 48 h (static)             | Mortality, EC <sub>50</sub> | <b>0.027</b> mg met./L <sup>3</sup>                                              |
| <i>Daphnia magna</i>                                     | SYN545245      | 48 h (static)             | Mortality, EC <sub>50</sub> | > <b>100</b> mg met./L (nom)                                                     |
| <b>Sediment-dwelling organisms</b>                       |                |                           |                             |                                                                                  |
| <i>Hyalella azteca</i><br>(spiked sediment study)        | Fludioxonil    | 10 d<br>(semi-static)     | Mortality, EC <sub>50</sub> | > 84 mg a.s./kg dry sediment (mm)                                                |
| <i>Leptocheirus plumulosa</i><br>(spiked sediment study) | Fludioxonil    | 48 h<br>(static)          | Mortality, EC <sub>50</sub> | > 90 mg a.s./kg dry sediment (mm)                                                |



| Group                                                        | Test substance      | Time-scale<br>(Test type) | End point                                                                                                                                                                                                                   | Toxicity <sup>1</sup>                                                                                                                                                                        |
|--------------------------------------------------------------|---------------------|---------------------------|-----------------------------------------------------------------------------------------------------------------------------------------------------------------------------------------------------------------------------|----------------------------------------------------------------------------------------------------------------------------------------------------------------------------------------------|
| <i>Chironomus dilutus</i><br>(spiked sediment study)         | Fludioxonil         | 48 h<br>(semi-static)     | Mortality, EC <sub>50</sub>                                                                                                                                                                                                 | <b>100</b> mg a.s./kg dry sediment <sub>(mm)</sub>                                                                                                                                           |
| <i>Chironomus riparius</i><br>(spiked sediment study)        | Fludioxonil         | 28 d (static)             | Emergence and development, NOEC                                                                                                                                                                                             | <b>40</b> mg a.s./kg dry sediment <sub>(nom)</sub>                                                                                                                                           |
| <i>Chironomus dilutus</i><br>(spiked sediment study)         | CGA192155           | 48 h<br>(semi-static)     | Mortality, EC <sub>50</sub>                                                                                                                                                                                                 | 10 mg a.s /kg dw <sup>3</sup>                                                                                                                                                                |
| <i>Chironomus riparius</i><br>(spiked sediment study)        | CGA192155           | 28 d (static)             | Emergence and development, NOEC                                                                                                                                                                                             | 4 mg a.s./kg dw <sup>3</sup>                                                                                                                                                                 |
| <b>Algae</b>                                                 |                     |                           |                                                                                                                                                                                                                             |                                                                                                                                                                                              |
| <i>Pseudokirchneriella subcapitata</i>                       | Fludioxonil         | 96 h (static)             | Growth rate: E <sub>r</sub> C <sub>50</sub><br>Growth rate: E <sub>r</sub> C <sub>10</sub>                                                                                                                                  | 0.259 mg a.s./L <sub>(mm)</sub><br>0.077 mg a.s./L <sub>(mm)</sub>                                                                                                                           |
| <i>Pseudokirchneriella subcapitata</i>                       | Fludioxonil         | 72 h (static)             | Growth rate: E <sub>r</sub> C <sub>50</sub><br>Growth rate: E <sub>r</sub> C <sub>50</sub><br>Growth rate: E <sub>r</sub> C <sub>10</sub><br>Yield: E <sub>y</sub> C <sub>50</sub><br>Yield: E <sub>y</sub> C <sub>10</sub> | > 0.442 mg a.s./L <sub>(mm)</sub><br>> 0.442 mg a.s./L <sub>(mm)</sub><br>(96 h)<br>0.255 mg a.s./L <sub>(mm)</sub><br>0.244 mg a.s./L <sub>(mm)</sub><br>0.012 mg a.s./L <sub>(mm)</sub>    |
| Geometric mean<br>( <i>Pseudokirchneriella subcapitata</i> ) | Fludioxonil         | 96 h                      | Geomean E <sub>r</sub> C <sub>50</sub>                                                                                                                                                                                      | <b>0.34</b> -mg a.s./L                                                                                                                                                                       |
| <i>Navicula pelliculosa</i>                                  | Fludioxonil         | 72 h (static)             | Growth rate: E <sub>r</sub> C <sub>50</sub><br>NOErC<br>Yield: E <sub>y</sub> C <sub>50</sub><br>Biomass: E <sub>b</sub> C <sub>50</sub>                                                                                    | > 1.2 mg a.s./L <sub>(mm)</sub><br>0.63 mg a.s./L <sub>(mm)</sub><br>0.86 mg a.s./L <sub>(mm)</sub><br>0.88 mg a.s./L <sub>(mm)</sub>                                                        |
| <i>Desmodesmus subspicatus</i>                               | A8240B <sup>2</sup> | 72 h (static)             | Growth rate: E <sub>r</sub> C <sub>50</sub><br>Growth rate: E <sub>r</sub> C <sub>10</sub><br>Biomass: E <sub>b</sub> C <sub>50</sub><br>NOE <sub>b</sub> C                                                                 | <b>0.544</b> mg prep./L <sub>(nom)</sub><br>(0.278 mg a.s./L <sub>(nom)</sub> )<br>0.183 mg prep./L <sub>(nom)</sub><br>0.25 mg prep./L <sub>(nom)</sub><br>0.11 mg prep./L <sub>(nom)</sub> |
| <i>Pseudokirchneriella subcapitata</i>                       | A8207M              | 72 h (static)             | Growth rate: E <sub>r</sub> C <sub>50</sub>                                                                                                                                                                                 | <b>5.45</b> mg prep./L <sub>(nom)</sub><br>(0.133 mg a.s./L <sub>(nom)</sub> )                                                                                                               |
| <i>Pseudokirchneriella subcapitata</i>                       | CGA192155           | 72 h (static)             | Growth rate: E <sub>r</sub> C <sub>50</sub><br>NOErC                                                                                                                                                                        | > <b>100</b> mg met./L <sub>(nom)</sub><br>100 mg met./L <sub>(nom)</sub>                                                                                                                    |
| <i>Pseudokirchneriella subcapitata</i>                       | CGA339833           | 72 h (static)             | Biomass: E <sub>b</sub> C <sub>50</sub><br>Growth rate: E <sub>r</sub> C <sub>50</sub><br>Growth rate: E <sub>r</sub> C <sub>10</sub>                                                                                       | 95.8 mg met./L <sub>(nom)</sub><br>> <b>100</b> mg met./L <sub>(nom)</sub><br>36.59 mg met./L <sub>(nom)</sub>                                                                               |
| <i>Pseudokirchneriella subcapitata</i>                       | SYN545245           | 72 h (static)             | Biomass: E <sub>b</sub> C <sub>50</sub><br>Yield: E <sub>y</sub> C <sub>50</sub><br>Growth rate: E <sub>r</sub> C <sub>50</sub><br>NOEC                                                                                     | 30 mg met./L <sub>(nom)</sub><br>41 mg met./L <sub>(nom)</sub><br><b>44</b> mg met./L <sub>(nom)</sub><br>25 mg met./L <sub>(nom)</sub>                                                      |

| Group                                                                                                                                                                                                                                                                                                                                                                                                                                                                                                                                                                                                                                                                                                                                                                                                                                                                                                                                                                                                                                                                                                                                                                                                                                                                                                                                                                                                          | Test substance | Time-scale<br>(Test type) | End point                                   | Toxicity <sup>1</sup>               |
|----------------------------------------------------------------------------------------------------------------------------------------------------------------------------------------------------------------------------------------------------------------------------------------------------------------------------------------------------------------------------------------------------------------------------------------------------------------------------------------------------------------------------------------------------------------------------------------------------------------------------------------------------------------------------------------------------------------------------------------------------------------------------------------------------------------------------------------------------------------------------------------------------------------------------------------------------------------------------------------------------------------------------------------------------------------------------------------------------------------------------------------------------------------------------------------------------------------------------------------------------------------------------------------------------------------------------------------------------------------------------------------------------------------|----------------|---------------------------|---------------------------------------------|-------------------------------------|
| <i>Pseudokirchneriella subcapitata</i>                                                                                                                                                                                                                                                                                                                                                                                                                                                                                                                                                                                                                                                                                                                                                                                                                                                                                                                                                                                                                                                                                                                                                                                                                                                                                                                                                                         | CGA265378      | 96 h                      | Growth rate: E <sub>r</sub> C <sub>50</sub> | <b>0.034</b> mg met./L <sup>5</sup> |
| <i>Pseudokirchneriella subcapitata</i>                                                                                                                                                                                                                                                                                                                                                                                                                                                                                                                                                                                                                                                                                                                                                                                                                                                                                                                                                                                                                                                                                                                                                                                                                                                                                                                                                                         | D9             | 96 h                      | Growth rate: E <sub>r</sub> C <sub>50</sub> | <b>0.034</b> mg met./L <sup>5</sup> |
| <i>Pseudokirchneriella subcapitata</i>                                                                                                                                                                                                                                                                                                                                                                                                                                                                                                                                                                                                                                                                                                                                                                                                                                                                                                                                                                                                                                                                                                                                                                                                                                                                                                                                                                         | MF2            | 96 h                      | Growth rate: E <sub>r</sub> C <sub>50</sub> | <b>0.034</b> mg met./L <sup>5</sup> |
| <b>Higher plant</b>                                                                                                                                                                                                                                                                                                                                                                                                                                                                                                                                                                                                                                                                                                                                                                                                                                                                                                                                                                                                                                                                                                                                                                                                                                                                                                                                                                                            |                |                           |                                             |                                     |
| Further testing on aquatic organisms<br>Mesocosm (Giddings, 2013)<br>NOEC fish = 0.0328 mg a.s./L                                                                                                                                                                                                                                                                                                                                                                                                                                                                                                                                                                                                                                                                                                                                                                                                                                                                                                                                                                                                                                                                                                                                                                                                                                                                                                              |                |                           |                                             |                                     |
| Potential endocrine disrupting properties (Annex Part A, point 8.2.3)<br>The pattern of EAS-mediated adversity identified in mammalian studies was considered relevant at the level of population and thus also adverse for wild mammals.<br>For non-mammalian species, the following data were available:<br>1. Amphibian Metamorphosis Assay according to OECD TG 231;<br>2. Fish Short-Term Reproduction Assay according to OECD TG 229<br>3. Fish Sexual development Test according to OECD TG 234<br>4. Fish Full life cycle toxicity test according to USEPA 850.1500.<br>While the AMA is relevant for the investigation of the ED properties of fludioxonil through the T-modality, the other studies are relevant for the EAS-modalities.<br>Overall, the experts agreed that the effects observed in the AMA are more likely attributable to systemic toxicity and therefore concluded that the study did not show a pattern showing interference with the HPT axis.<br>The available fish studies, as reported above, showed all a consistent pattern of effects, change in female gonad histopathology, reduced secondary sex characteristics in males, reduced fecundity.<br>When considering all the mammalian and non-mammalian data together, the experts agreed that there was a clear pattern of adversity and endocrine activity across species and taxa suggesting an anti-androgenic MoA. |                |                           |                                             |                                     |

Values in **bold** are used for TER calculation

<sup>1</sup> (nom) nominal concentration; (mm) mean measured concentration; (twmm) time-weighted mean measured concentrations; (ini meas) initial measured concentration; prep.: preparation; a.s.: active substance

<sup>2</sup> formulation variant equivalent to A8240D

<sup>3</sup> the metabolite is assumed 10 times more toxic than the active substance

<sup>4</sup> The metabolites are assumed as 10 times more toxic of parental geometric mean for *Oncorhynchus mykiss* where LC<sub>50</sub> = 0.38 mg fludioxonil/L

<sup>5</sup> The metabolites are assumed as 10 times more toxic of parental geometric mean for *Pseudokirchneriella subcapitata* where E<sub>r</sub>C<sub>50</sub> = 0.34 mg fludioxonil/L

<sup>6</sup> Study not suitable for the risk assessment due to the following shortcomings: 1/ Number of neonates in solvent control 35% lower than in the control, and some dead neonates also present in the solvent control. Scale of difference suggests data may be unreliable. 2/ Solvent used in unequal concentrations in test concentrations. 3/ Test concentrations produced by diluting suspensions of fludioxonil prepared above limit of functional solubility. Insufficient number of analytical samples did not cover 72h renewal interval. Undissolved test material visible on day 21. As fludioxonil is not easy to get into solution, the analytical results are unreliable.

### Bioconcentration in fish (Annex Part A, point 8.2.2.3)

|                     | Active substance | Metabolite1 | Metabolite2 | Metabolite3 |
|---------------------|------------------|-------------|-------------|-------------|
| logP <sub>0/w</sub> | 4                |             |             |             |

|                                                                                              |                   |  |  |  |
|----------------------------------------------------------------------------------------------|-------------------|--|--|--|
| Steady-state bioconcentration factor (BCF) (total wet weight/normalised to 5% lipid content) | 366 (whole fish)* |  |  |  |
| Uptake/depuration kinetics BCF (total wet weight/normalised to 5% lipid content)             | -                 |  |  |  |
| Annex VI Trigger for the bioconcentration factor                                             | -                 |  |  |  |
| Clearance time (days) (CT <sub>50</sub> )                                                    | 0.6               |  |  |  |
| (CT <sub>90</sub> )                                                                          | 1.8               |  |  |  |
| Level and nature of residues (%) in organisms after the 14 day depuration phase              | -                 |  |  |  |
| Higher tier study                                                                            |                   |  |  |  |
| -                                                                                            |                   |  |  |  |

\* based on <sup>14</sup>C-fludioxonil

**Toxicity/exposure ratios for the most sensitive aquatic organisms (Regulation (EU) N° 284/2013, Annex Part A, point 10.2)**
**A8240D: Grapes at 500 g a.s./ha [1 applications]**
**FOCUS<sub>sw</sub> step 1-3 – PEC/RAC ratio for fludioxonil – Grapes at 500 g a.s./ha [1 application]**

| Scenario                                                      | PEC <sub>sw</sub><br>global<br>max(µg/L) | fish acute                  | fish chronic                   | Aquatic<br>invertebrates<br>acute | Aquatic<br>invertebrates<br>prolonged | Algae                                                        | PEC <sub>sed</sub><br>(µg/kg) | Sed. dweller<br>acute         | Sed. dweller<br>prolonged      |
|---------------------------------------------------------------|------------------------------------------|-----------------------------|--------------------------------|-----------------------------------|---------------------------------------|--------------------------------------------------------------|-------------------------------|-------------------------------|--------------------------------|
|                                                               |                                          | Geometric mean<br>4 species | <i>Pimephales<br/>promelas</i> | Geometric mean<br>2 species       | <i>Americamysis<br/>bahia</i>         | Geometric mean<br><i>Pseudokirchneriella<br/>subcapitata</i> |                               | <i>Chironomus<br/>dilutus</i> | <i>Chironomus<br/>riparius</i> |
|                                                               |                                          | LC <sub>50</sub>            | NOEC                           | EC <sub>50</sub>                  | NOEC                                  | EC <sub>50</sub>                                             |                               | LC <sub>50</sub>              | NOEC                           |
|                                                               |                                          | 630 µg/L                    | 18 µg/L                        | 402 µg/L                          | 24 µg/L                               | 430 µg/L                                                     |                               | 100000 µg/kg                  | 40000 µg/kg                    |
| <b>RAC</b>                                                    |                                          | 6.3                         | 1.8                            | 4.02                              | 2.4                                   | 34                                                           |                               | 1000                          | 4000                           |
| <b>FOCUS Step 1</b>                                           |                                          |                             |                                |                                   |                                       |                                                              |                               |                               |                                |
|                                                               | 97.3                                     | <b>15.4</b>                 | <b>54.06</b>                   | <b>24.23</b>                      | <b>40.54</b>                          | <b>2.86</b>                                                  | 2130                          | <b>2.13</b>                   | 0.53                           |
| <b>FOCUS Step 2</b>                                           |                                          |                             |                                |                                   |                                       |                                                              |                               |                               |                                |
| North Europe                                                  | 13.4                                     | <b>2.13</b>                 | <b>7.44</b>                    | <b>3.33</b>                       | <b>5.58</b>                           | 0.39                                                         | 273                           | 0.27                          | -                              |
| South Europe                                                  | 13.4                                     | <b>2.13</b>                 | <b>7.44</b>                    | <b>3.33</b>                       | <b>5.58</b>                           | 0.39                                                         | 234                           | 0.23                          | -                              |
| <b>FOCUS Step 3<br/>(window starting<br/>at BBCH 67)*</b>     |                                          |                             |                                |                                   |                                       |                                                              |                               |                               |                                |
| D6 / ditch                                                    | 8.54                                     | <b>1.36</b>                 | <b>4.74</b>                    | <b>2.12</b>                       | <b>3.56</b>                           | -                                                            | -                             | -                             | -                              |
| R1 / pond                                                     | 0.312                                    | 0.05                        | 0.17                           | 0.08                              | 0.13                                  | -                                                            | -                             | -                             | -                              |
| R1 / stream                                                   | 6.09                                     | 0.97                        | <b>3.38</b>                    | <b>1.51</b>                       | <b>2.54</b>                           | -                                                            | -                             | -                             | -                              |
| R2 / stream                                                   | 8.39                                     | <b>1.33</b>                 | <b>4.66</b>                    | <b>2.09</b>                       | <b>3.50</b>                           | -                                                            | -                             | -                             | -                              |
| R3 / stream                                                   | 8.83                                     | <b>1.40</b>                 | <b>4.91</b>                    | <b>2.20</b>                       | <b>3.68</b>                           | -                                                            | -                             | -                             | -                              |
| R4 / stream                                                   | 6.26                                     | 0.99                        | <b>3.48</b>                    | <b>1.56</b>                       | <b>2.61</b>                           | -                                                            | -                             | -                             | -                              |
| <b>FOCUS Step 3<br/>(window ending at<br/>harvest - PHI)*</b> |                                          |                             |                                |                                   |                                       |                                                              |                               |                               |                                |
| D6 / ditch                                                    | 8.54                                     | <b>1.36</b>                 | <b>4.74</b>                    | <b>2.12</b>                       | <b>3.56</b>                           | -                                                            | -                             | -                             | -                              |

|             |       |             |             |             |             |   |   |   |   |
|-------------|-------|-------------|-------------|-------------|-------------|---|---|---|---|
| R1 / pond   | 0.309 | 0.05        | 0.17        | 0.08        | 0.13        | - | - | - | - |
| R1 / stream | 6.26  | 0.99        | <b>3.48</b> | <b>1.56</b> | <b>2.61</b> | - | - | - | - |
| R2 / stream | 8.39  | <b>1.33</b> | <b>4.66</b> | <b>2.09</b> | <b>3.50</b> | - | - | - | - |
| R3 / stream | 8.83  | <b>1.40</b> | <b>4.91</b> | <b>2.20</b> | <b>3.68</b> | - | - | - | - |
| R4 / stream | 6.26  | 0.99        | <b>3.48</b> | <b>1.56</b> | <b>2.61</b> | - | - | - | - |

\*[Only scenarios where the trigger is not met at FOCUS<sub>sw</sub> step 1-2 should be included in step 3.]

#### FOCUS<sub>sw</sub> step 4 - PEC/RAC ratio for fludioxonil – Grapes at 500 g a.s./ha [1 application]

| <b>Organisms <i>Fish, geomean acute</i></b>           |                                                                                  |                                                                     |                                    |                          |  |
|-------------------------------------------------------|----------------------------------------------------------------------------------|---------------------------------------------------------------------|------------------------------------|--------------------------|--|
| <b>RAC: 6.3 µg/L</b>                                  |                                                                                  |                                                                     |                                    |                          |  |
| <b>Mitigation options</b>                             | <b>[x] m non-spray buffer zone<br/>(corresponding to ≤ 95 % drift reduction)</b> | <b>[x] % drift reduction from use of drift reducing<br/>nozzles</b> | <b>PEC<sub>sw</sub><br/>(µg/L)</b> | <b>PEC/RAC<br/>ratio</b> |  |
| <b>FOCUS Step 4 (window starting at BBCH 67)*</b>     |                                                                                  |                                                                     |                                    |                          |  |
| D6 / ditch                                            | 5                                                                                | -                                                                   | 5.16                               | 0.82                     |  |
| D6 / ditch                                            | -                                                                                | 50                                                                  | 4.04                               | 0.64                     |  |
| R2 / stream                                           | 5                                                                                | -                                                                   | 6.11                               | 0.97                     |  |
| R2 / stream                                           | -                                                                                | 50                                                                  | 3.97                               | 0.63                     |  |
| R3 / stream                                           | 10                                                                               | -                                                                   | 2.33                               | 0.37                     |  |
| R3 / stream                                           | -                                                                                | 50                                                                  | 4.17                               | 0.66                     |  |
| <b>FOCUS Step 4 (window ending at harvest - PHI)*</b> |                                                                                  |                                                                     |                                    |                          |  |
| D6 / ditch                                            | 5                                                                                | -                                                                   | 5.16                               | 0.82                     |  |
| D6 / ditch                                            | -                                                                                | 50                                                                  | 4.04                               | 0.64                     |  |
| R2 / stream                                           | 5                                                                                | -                                                                   | 6.11                               | 0.97                     |  |
| R2 / stream                                           | -                                                                                | 50                                                                  | 3.97                               | 0.63                     |  |
| R3 / stream                                           | 10                                                                               | -                                                                   | 2.33                               | 0.37                     |  |
| R3 / stream                                           | -                                                                                | 50                                                                  | 4.17                               | 0.66                     |  |
| <b>Organisms <i>Pimephales promelas, chronic</i></b>  |                                                                                  |                                                                     |                                    |                          |  |
| <b>RAC: 1.8 µg/L</b>                                  |                                                                                  |                                                                     |                                    |                          |  |
| <b>Mitigation options</b>                             | <b>[x] m non-spray buffer zone<br/>(corresponding to ≤ 95 % drift reduction)</b> | <b>[x] % drift reduction from use of drift reducing<br/>nozzles</b> | <b>PEC<sub>sw</sub><br/>(µg/L)</b> | <b>PEC/RAC<br/>ratio</b> |  |

---

**FOCUS Step 4 (window starting at BBCH 67)\***

|             |    |    |       |      |
|-------------|----|----|-------|------|
| D6 / ditch  | 15 | -  | 1.2   | 0.67 |
| D6 / ditch  | 10 | 50 | 0.932 | 0.52 |
| D6 / ditch  | 5  | 75 | 1.29  | 0.72 |
| D6 / ditch  | -  | 90 | 0.808 | 0.45 |
| R1 / stream | 10 | -  | 1.6   | 0.89 |
| R1 / stream | 10 | 50 | 0.801 | 0.45 |
| R1 / stream | -  | 75 | 1.44  | 0.80 |
| R2 / stream | 15 | -  | 0.506 | 0.28 |
| R2 / stream | 10 | 50 | 1.11  | 0.62 |
| R2 / stream | 5  | 75 | 1.53  | 0.85 |
| R2 / stream | -  | 90 | 0.794 | 0.44 |
| R3 / stream | 15 | -  | 0.075 | 0.04 |
| R3 / stream | 10 | 50 | 1.16  | 0.64 |
| R3 / stream | 5  | 75 | 1.6   | 0.89 |
| R3 / stream | -  | 90 | 0.835 | 0.46 |
| R4 / stream | 10 | -  | 1.65  | 0.92 |
| R4 / stream | 10 | 50 | 0.98  | 0.54 |
| R4 / stream | -  | 75 | 1.48  | 0.82 |

---

**FOCUS Step 4 (window ending at harvest - PHI)\***

|             |    |    |       |      |
|-------------|----|----|-------|------|
| D6 / ditch  | 15 | -  | 1.01  | 0.56 |
| D6 / ditch  | 10 | 50 | 0.932 | 0.52 |
| D6 / ditch  | 5  | 75 | 1.29  | 0.72 |
| D6 / ditch  | -  | 90 | 0.808 | 0.45 |
| R1 / stream | 10 | -  | 1.65  | 0.92 |
| R1 / stream | 10 | 50 | 0.824 | 0.46 |
| R1 / stream | -  | 75 | 1.48  | 0.82 |
| R2 / stream | 15 | -  | 1.2   | 0.67 |
| R2 / stream | 10 | 50 | 1.11  | 0.62 |
| R2 / stream | 5  | 75 | 1.53  | 0.85 |
| R2 / stream | -  | 90 | 0.794 | 0.44 |
| R3 / stream | 15 | -  | 1.26  | 0.70 |
| R3 / stream | 10 | 50 | 1.16  | 0.64 |
| R3 / stream | 5  | 75 | 1.6   | 0.89 |
| R3 / stream | -  | 90 | 0.835 | 0.46 |
| R4 / stream | 10 | -  | 1.65  | 0.92 |
| R4 / stream | 10 | 50 | 0.98  | 0.54 |

---

|             |   |    |      |      |
|-------------|---|----|------|------|
| R4 / stream | - | 75 | 1.48 | 0.82 |
|-------------|---|----|------|------|

**Organisms:**

*Aquatic invertebrate, geomean acute*

**RAC:** 4.02 µg/L

| Mitigation options                                | [x] m non-spray buffer zone<br>(corresponding to ≤ 95 % drift reduction) | [x] % drift reduction from use of drift reducing nozzles | PEC <sub>sw</sub><br>(µg/L) | PEC/RAC<br>ratio |
|---------------------------------------------------|--------------------------------------------------------------------------|----------------------------------------------------------|-----------------------------|------------------|
| <b>FOCUS Step 4 (window starting at BBCH 67)*</b> |                                                                          |                                                          |                             |                  |
| D6 / ditch                                        | 10                                                                       | -                                                        | 1.87                        | 0.47             |
| D6 / ditch                                        | -                                                                        | 50                                                       | 4.04                        | 1.00             |
| R1 / stream                                       | 10                                                                       | -                                                        | 1.6                         | 0.40             |
| R1 / stream                                       | -                                                                        | 50                                                       | 2.88                        | 0.72             |
| R2 / stream                                       | 10                                                                       | -                                                        | 2.21                        | 0.55             |
| R2 / stream                                       | -                                                                        | 50                                                       | 3.97                        | 0.99             |
| R3 / stream                                       | 10                                                                       | -                                                        | 2.33                        | 0.58             |
| R3 / stream                                       | 5                                                                        | 50                                                       | 3.21                        | 0.80             |
| R3 / stream                                       | -                                                                        | 75                                                       | 2.09                        | 0.52             |
| R4 / stream                                       | 10                                                                       | -                                                        | 1.65                        | 0.41             |
| R4 / stream                                       | -                                                                        | 50                                                       | 2.96                        | 0.74             |

**FOCUS Step 4 (window ending at harvest - PHI)\***

|             |    |    |      |      |
|-------------|----|----|------|------|
| D6 / ditch  | 10 | -  | 1.87 | 0.47 |
| D6 / ditch  | -  | 50 | 4.04 | 1.00 |
| R1 / stream | 10 | -  | 1.65 | 0.41 |
| R1 / stream | -  | 50 | 2.96 | 0.74 |
| R2 / stream | 10 | -  | 2.21 | 0.55 |
| R2 / stream | -  | 50 | 3.97 | 0.99 |
| R3 / stream | 10 | -  | 2.33 | 0.58 |
| R3 / stream | 5  | 50 | 3.21 | 0.80 |
| R3 / stream | -  | 75 | 2.09 | 0.52 |
| R4 / stream | 10 | -  | 1.65 | 0.41 |
| R4 / stream | -  | 50 | 2.96 | 0.74 |

**Organisms:**

*Americamysis bahia, chronic*

**RAC:** 2.4 µg/L

| Mitigation options                                    | [x] m non-spray buffer zone<br>(corresponding to $\leq 95$ % drift reduction) | [x] % drift reduction from use of drift reducing nozzles | PEC <sub>sw</sub><br>( $\mu\text{g/L}$ ) | PEC/RAC<br>ratio |
|-------------------------------------------------------|-------------------------------------------------------------------------------|----------------------------------------------------------|------------------------------------------|------------------|
| <b>FOCUS Step 4 (window starting at BBCH 67)*</b>     |                                                                               |                                                          |                                          |                  |
| D6 / ditch                                            | 10                                                                            | -                                                        | 1.87                                     | 0.78             |
| D6 / ditch                                            | 10                                                                            | 50                                                       | 0.932                                    | 0.39             |
| D6 / ditch                                            | -                                                                             | 75                                                       | 2.02                                     | 0.84             |
| R1 / stream                                           | 10                                                                            | -                                                        | 1.6                                      | 0.67             |
| R1 / stream                                           | 5                                                                             | 50                                                       | 2.22                                     | 0.93             |
| R1 / stream                                           | -                                                                             | 75                                                       | 1.44                                     | 0.60             |
| R2 / stream                                           | 10                                                                            | -                                                        | 2.21                                     | 0.92             |
| R2 / stream                                           | 10                                                                            | 50                                                       | 1.11                                     | 0.46             |
| R2 / stream                                           | -                                                                             | 75                                                       | 1.99                                     | 0.83             |
| R3 / stream                                           | 10                                                                            | -                                                        | 2.33                                     | 0.97             |
| R3 / stream                                           | 10                                                                            | 50                                                       | 1.16                                     | 0.48             |
| R3 / stream                                           | -                                                                             | 75                                                       | 2.09                                     | 0.87             |
| R4 / stream                                           | 10                                                                            | -                                                        | 1.65                                     | 0.69             |
| R4 / stream                                           | 5                                                                             | 50                                                       | 2.28                                     | 0.95             |
| R4 / stream                                           | -                                                                             | 75                                                       | 1.48                                     | 0.62             |
| <b>FOCUS Step 4 (window ending at harvest - PHI)*</b> |                                                                               |                                                          |                                          |                  |
| D6 / ditch                                            | 10                                                                            | -                                                        | 1.87                                     | 0.78             |
| D6 / ditch                                            | 10                                                                            | 50                                                       | 0.932                                    | 0.39             |
| D6 / ditch                                            | -                                                                             | 75                                                       | 2.02                                     | 0.84             |
| R1 / stream                                           | 10                                                                            | -                                                        | 1.65                                     | 0.69             |
| R1 / stream                                           | 5                                                                             | 50                                                       | 2.28                                     | 0.95             |
| R1 / stream                                           | -                                                                             | 75                                                       | 1.48                                     | 0.62             |
| R2 / stream                                           | 10                                                                            | -                                                        | 2.21                                     | 0.92             |
| R2 / stream                                           | 10                                                                            | 50                                                       | 1.11                                     | 0.46             |
| R2 / stream                                           | -                                                                             | 75                                                       | 1.99                                     | 0.83             |
| R3 / stream                                           | 10                                                                            | -                                                        | 2.33                                     | 0.97             |
| R3 / stream                                           | 10                                                                            | 50                                                       | 1.16                                     | 0.48             |
| R3 / stream                                           | -                                                                             | 75                                                       | 2.09                                     | 0.87             |
| R4 / stream                                           | 10                                                                            | -                                                        | 1.65                                     | 0.69             |
| R4 / stream                                           | 5                                                                             | 50                                                       | 2.28                                     | 0.95             |
| R4 / stream                                           | -                                                                             | 75                                                       | 1.48                                     | 0.62             |

\*[ Only scenarios where the trigger is not met at FOCUS<sub>sw</sub> step 3 should be included in step 4].



**A8240D: Grapes at 500 g a.s./ha [2 applications]****FOCUS<sub>sw</sub> step 1-3 – PEC/RAC ratio for fludioxonil – Grapes at 500 g a.s./ha [2 applications]**

| Scenario                                                  | PEC <sub>sw</sub><br>global<br>max(µg/L) | fish acute                  | fish chronic                   | Aquatic<br>invertebrates<br>acute | Aquatic<br>invertebrates<br>prolonged | Algae                                                        | PEC <sub>sed</sub><br>(µg/kg) | Sed. dweller<br>acute         | Sed. dweller<br>prolonged      |
|-----------------------------------------------------------|------------------------------------------|-----------------------------|--------------------------------|-----------------------------------|---------------------------------------|--------------------------------------------------------------|-------------------------------|-------------------------------|--------------------------------|
|                                                           |                                          | Geometric mean<br>4 species | <i>Pimephales<br/>promelas</i> | Geometric mean<br>2 species       | <i>Americamysis<br/>bahia</i>         | Geometric mean<br><i>Pseudokirchneriella<br/>subcapitata</i> |                               | <i>Chironomus<br/>dilutus</i> | <i>Chironomus<br/>riparius</i> |
|                                                           |                                          | LC <sub>50</sub>            | NOEC                           | EC <sub>50</sub>                  | NOEC                                  | EC <sub>50</sub>                                             |                               | LC <sub>50</sub>              | NOEC                           |
|                                                           |                                          | 630 µg/L                    | 18 µg/L                        | 402 µg/L                          | 24 µg/L                               | 430 µg/L                                                     |                               | 100000 µg/kg                  | 40000 µg/kg                    |
| <b>RAC</b>                                                |                                          | 6.3                         | 1.8                            | 4.02                              | 2.4                                   | 34                                                           |                               | 1000                          | 4000                           |
| <b>FOCUS Step 1</b>                                       |                                          |                             |                                |                                   |                                       |                                                              |                               |                               |                                |
|                                                           | 97.3                                     | <b>15.4</b>                 | <b>54.06</b>                   | <b>24.2</b>                       | <b>40.54</b>                          | <b>2.86</b>                                                  | 2130                          | <b>2.13</b>                   | 0.53                           |
| <b>FOCUS Step 2</b>                                       |                                          |                             |                                |                                   |                                       |                                                              |                               |                               |                                |
| North Europe                                              | 20.3                                     | <b>3.22</b>                 | <b>11.28</b>                   | <b>5.05</b>                       | <b>8.46</b>                           | 0.60                                                         | 515                           | 0.52                          | -                              |
| South Europe                                              | 17.6                                     | <b>2.79</b>                 | <b>9.78</b>                    | <b>4.38</b>                       | <b>7.33</b>                           | 0.52                                                         | 439                           | 0.44                          | -                              |
| <b>FOCUS Step 3<br/>(window starting at<br/>BBCH 67)*</b> |                                          |                             |                                |                                   |                                       |                                                              |                               |                               |                                |
| D6 / ditch                                                | 7.86                                     | <b>1.25</b>                 | <b>4.37</b>                    | <b>1.96</b>                       | <b>3.28</b>                           | -                                                            | -                             | -                             | -                              |
| R1 / pond                                                 | 0.428                                    | 0.07                        | 0.24                           | 0.11                              | 0.18                                  | -                                                            | -                             | -                             | -                              |
| R1 / stream                                               | 5.52                                     | 0.88                        | <b>3.07</b>                    | <b>1.37</b>                       | <b>2.30</b>                           | -                                                            | -                             | -                             | -                              |
| R2 / stream                                               | 7.4                                      | <b>1.17</b>                 | <b>4.11</b>                    | <b>1.84</b>                       | <b>3.08</b>                           | -                                                            | -                             | -                             | -                              |
| R3 / stream                                               | 7.79                                     | <b>1.24</b>                 | <b>4.33</b>                    | <b>1.94</b>                       | <b>3.25</b>                           | -                                                            | -                             | -                             | -                              |
| R4 / stream                                               | 5.52                                     | 0.88                        | <b>3.07</b>                    | <b>1.37</b>                       | <b>2.30</b>                           | -                                                            | -                             | -                             | -                              |

**FOCUS Step 3  
(window ending at  
harvest - PHI)\***

|            |      |             |             |             |             |   |            |            |            |
|------------|------|-------------|-------------|-------------|-------------|---|------------|------------|------------|
| D6 / ditch | 7.84 | <b>1.24</b> | <b>4.36</b> | <b>1.95</b> | <b>3.27</b> | - | -<br>108** | -<br>0.108 | -<br>0.027 |
|------------|------|-------------|-------------|-------------|-------------|---|------------|------------|------------|

|             |      |             |             |             |             |   |   |   |   |
|-------------|------|-------------|-------------|-------------|-------------|---|---|---|---|
| R1 / pond   | 0.41 | 0.07        | 0.23        | 0.10        | 0.17        | - | - | - | - |
| R1 / stream | 5.52 | 0.88        | <b>3.07</b> | <b>1.37</b> | <b>2.30</b> | - | - | - | - |
| R2 / stream | 7.4  | <b>1.17</b> | <b>4.11</b> | <b>1.84</b> | <b>3.08</b> | - | - | - | - |
| R3 / stream | 7.79 | <b>1.24</b> | <b>4.33</b> | <b>1.94</b> | <b>3.25</b> | - | - | - | - |
| R4 / stream | 5.52 | 0.88        | <b>3.07</b> | <b>1.37</b> | <b>2.30</b> | - | - | - | - |

\*[Only scenarios where the trigger is not met at FOCUS<sub>sw</sub> step 1-2 should be included in step 3.]

\*\* Sediment accumulation PEC (presented only for the worst case maximum PEC sediment).

#### FOCUS<sub>sw</sub> step 4 - PEC/RAC ratio for fludioxonil – Grapes at 500 g a.s./ha [2 applications]

**Organisms** *Fish, geomean*

*acute*

**RAC:** 6.3 µg/L

| Mitigation options                                    | [x] m non-spray buffer zone<br>(corresponding to ≤ 95 % drift<br>reduction) | [x] m vegetated buffer strip<br>(corresponding to ≤ 90 % run-off<br>reduction) | [x] % drift reduction from use of<br>drift reducing nozzles | PEC <sub>sw</sub><br>(µg/L) | PEC/RAC<br>ratio |
|-------------------------------------------------------|-----------------------------------------------------------------------------|--------------------------------------------------------------------------------|-------------------------------------------------------------|-----------------------------|------------------|
| <b>FOCUS Step 4 (window<br/>starting at BBCH 67)*</b> |                                                                             |                                                                                |                                                             |                             |                  |
| D6 / ditch                                            | 5                                                                           | -                                                                              | -                                                           | 4.73                        | 0.75             |
| D6 / ditch                                            | -                                                                           | -                                                                              | 50                                                          | 3.84                        | 0.61             |
| R2 / stream                                           | 5                                                                           | -                                                                              | -                                                           | 5.38                        | 0.85             |
| R2 / stream                                           | -                                                                           | -                                                                              | 50                                                          | 3.50                        | 0.56             |
| R3 / stream                                           | 5                                                                           | -                                                                              | -                                                           | 5.66                        | 0.90             |
| R3 / stream                                           | -                                                                           | -                                                                              | 50                                                          | 3.68                        | 0.58             |

**FOCUS Step 4 (window  
ending at harvest - PHI)\***

|             |   |   |    |      |      |
|-------------|---|---|----|------|------|
| D6 / ditch  | 5 | - | -  | 4.72 | 0.75 |
| D6 / ditch  | - | - | 50 | 3.83 | 0.61 |
| R2 / stream | 5 | - | -  | 5.38 | 0.85 |
| R2 / stream | - | - | 50 | 3.50 | 0.56 |
| R3 / stream | 5 | - | -  | 5.66 | 0.90 |
| R3 / stream | - | - | 50 | 3.68 | 0.58 |

**Organisms**

*Pimephales promelas,*

*chronic*

**RAC:** 1.8 µg/L

| Mitigation options                                                  | [x] m non-spray buffer zone<br>(corresponding to ≤ 95 % drift<br>reduction) | [x] m vegetated buffer strip<br>(corresponding to ≤ 90 % run-off<br>reduction) | [x] % drift reduction from use of drift<br>reducing nozzles | PEC <sub>sw</sub><br>(µg/L) | PEC/RAC<br>ratio |
|---------------------------------------------------------------------|-----------------------------------------------------------------------------|--------------------------------------------------------------------------------|-------------------------------------------------------------|-----------------------------|------------------|
| <b>FOCUS Step 4</b><br>(window starting at<br>BBCH 67)*             |                                                                             |                                                                                |                                                             |                             |                  |
| D6 / ditch                                                          | 10                                                                          | -                                                                              | -                                                           | 1.69                        | 0.94             |
| D6 / ditch                                                          | 10                                                                          | -                                                                              | 50                                                          | 0.845                       | 0.47             |
| D6 / ditch                                                          | 5                                                                           | -                                                                              | 75                                                          | 1.18                        | 0.66             |
| D6 / ditch                                                          | -                                                                           | -                                                                              | 90                                                          | 0.769                       | 0.43             |
| R1 / stream                                                         | 10                                                                          | -                                                                              | -                                                           | 1.44                        | 0.80             |
| R1 / stream                                                         | 10                                                                          | -                                                                              | 50                                                          | 0.962                       | 0.53             |
| R1 / stream                                                         | -                                                                           | -                                                                              | 75                                                          | 1.31                        | 0.73             |
| R2 / stream                                                         | 15                                                                          | -                                                                              | -                                                           | 1.04                        | 0.58             |
| R2 / stream                                                         | 10                                                                          | -                                                                              | 50                                                          | 0.964                       | 0.54             |
| R2 / stream                                                         | -                                                                           | -                                                                              | 75                                                          | 1.75                        | 0.97             |
| R3 / stream                                                         | 15                                                                          | -                                                                              | -                                                           | 1.45                        | 0.81             |
| R3 / stream                                                         | 10                                                                          | -                                                                              | 50                                                          | 1.45                        | 0.81             |
| R3 / stream                                                         | 5                                                                           | -                                                                              | 75                                                          | 1.45                        | 0.81             |
| R3 / stream                                                         | -                                                                           | -                                                                              | 90                                                          | 0.737                       | 0.41             |
| R4 / stream                                                         | 10                                                                          | 10                                                                             | -                                                           | 1.44                        | 0.80             |
| <b>FOCUS Step 4</b><br>(window ending at<br>harvest - PHI)*         |                                                                             |                                                                                |                                                             |                             |                  |
| D6 / ditch                                                          | 30                                                                          | -                                                                              | -                                                           | 2.04                        | <b>1.13</b>      |
| R1 / stream                                                         | 10                                                                          | -                                                                              | -                                                           | 1.44                        | 0.80             |
| R1 / stream                                                         | 10                                                                          | -                                                                              | 50                                                          | 0.90                        | 0.50             |
| R1 / stream                                                         | -                                                                           | -                                                                              | 75                                                          | 1.31                        | 0.73             |
| R2 / stream                                                         | 15                                                                          | -                                                                              | -                                                           | 1.04                        | 0.58             |
| R2 / stream                                                         | 10                                                                          | -                                                                              | 50                                                          | 0.964                       | 0.54             |
| R2 / stream                                                         | -                                                                           | -                                                                              | 75                                                          | 1.75                        | 0.97             |
| R3 / stream                                                         | 15                                                                          | -                                                                              | -                                                           | 1.45                        | 0.81             |
| R3 / stream                                                         | 10                                                                          | -                                                                              | 50                                                          | 1.45                        | 0.81             |
| R3 / stream                                                         | 5                                                                           | -                                                                              | 75                                                          | 1.45                        | 0.81             |
| R3 / stream                                                         | -                                                                           | -                                                                              | 90                                                          | 0.737                       | 0.41             |
| R4 / stream                                                         | 10                                                                          | 10                                                                             | -                                                           | 1.44                        | 0.80             |
| <b>Organisms:</b><br><i>Aquatic invertebrate, geomean<br/>acute</i> |                                                                             |                                                                                |                                                             |                             |                  |

| <b>RAC: 4.02 µg/L</b>                                 |                                                                                  |                                                                 |                                    |                          |
|-------------------------------------------------------|----------------------------------------------------------------------------------|-----------------------------------------------------------------|------------------------------------|--------------------------|
| <b>Mitigation options</b>                             | <b>[x] m non-spray buffer zone<br/>(corresponding to ≤ 95 % drift reduction)</b> | <b>[x] % drift reduction from use of drift reducing nozzles</b> | <b>PEC<sub>sw</sub><br/>(µg/L)</b> | <b>PEC/RAC<br/>ratio</b> |
| <b>FOCUS Step 4 (window starting at BBCH 67)*</b>     |                                                                                  |                                                                 |                                    |                          |
| D6 / ditch                                            | 10                                                                               | -                                                               | 1.69                               | 0.42                     |
| D6 / ditch                                            | -                                                                                | 50                                                              | 3.84                               | 0.96                     |
| R1 / stream                                           | 5                                                                                | -                                                               | 4.01                               | 1.00                     |
| R1 / stream                                           | -                                                                                | 50                                                              | 2.61                               | 0.65                     |
| R2 / stream                                           | 10                                                                               | -                                                               | 1.93                               | 0.48                     |
| R2 / stream                                           | -                                                                                | 50                                                              | 3.50                               | 0.87                     |
| R3 / stream                                           | 10                                                                               | -                                                               | 2.03                               | 0.50                     |
| R3 / stream                                           | -                                                                                | 50                                                              | 3.68                               | 0.97                     |
| R4 / stream                                           | 5                                                                                | -                                                               | 4.01                               | 1.00                     |
| R4 / stream                                           | -                                                                                | 50                                                              | 2.61                               | 0.65                     |
| <b>FOCUS Step 4 (window ending at harvest - PHI)*</b> |                                                                                  |                                                                 |                                    |                          |
| D6 / ditch                                            | 10                                                                               | -                                                               | 2.04                               | 0.51                     |
| D6 / ditch                                            | -                                                                                | 50                                                              | 3.83                               | 0.95                     |
| R1 / stream                                           | 5                                                                                | -                                                               | 4.01                               | 1.00                     |
| R1 / stream                                           | -                                                                                | 50                                                              | 2.61                               | 0.65                     |
| R2 / stream                                           | 10                                                                               | -                                                               | 1.93                               | 0.48                     |
| R2 / stream                                           | -                                                                                | 50                                                              | 3.50                               | 0.87                     |
| R3 / stream                                           | 10                                                                               | -                                                               | 2.03                               | 0.50                     |
| R3 / stream                                           | -                                                                                | 50                                                              | 3.68                               | 0.92                     |
| R4 / stream                                           | 5                                                                                | -                                                               | 4.01                               | 1.00                     |
| R4 / stream                                           | -                                                                                | 50                                                              | 2.61                               | 0.65                     |
| <b>Organisms:</b>                                     |                                                                                  |                                                                 |                                    |                          |
| <i>Americamysis bahia, chronic</i>                    |                                                                                  |                                                                 |                                    |                          |
| <b>RAC: 2.4 µg/L</b>                                  |                                                                                  |                                                                 |                                    |                          |
| <b>Mitigation options</b>                             | <b>[x] m non-spray buffer zone<br/>(corresponding to ≤ 95 % drift reduction)</b> | <b>[x] % drift reduction from use of drift reducing nozzles</b> | <b>PEC<sub>sw</sub><br/>(µg/L)</b> | <b>PEC/RAC<br/>ratio</b> |
| <b>FOCUS Step 4 (window starting at BBCH 67)*</b>     |                                                                                  |                                                                 |                                    |                          |
| D6 / ditch                                            | 10                                                                               | -                                                               | 1.69                               | 0.70                     |
| D6 / ditch                                            | 5                                                                                | 50                                                              | 2.36                               | 0.98                     |
| D6 / ditch                                            | -                                                                                | 75                                                              | 1.92                               | 0.80                     |
| R1 / stream                                           | 10                                                                               | -                                                               | 1.44                               | 0.60                     |

|                                                       |    |    |       |      |
|-------------------------------------------------------|----|----|-------|------|
| R1 / stream                                           | 5  | 50 | 2.00  | 0.83 |
| R1 / stream                                           | -  | 75 | 1.31  | 0.55 |
| R2 / stream                                           | 10 | -  | 1.93  | 0.80 |
| R2 / stream                                           | 10 | 50 | 0.964 | 0.40 |
| R2 / stream                                           | -  | 75 | 1.75  | 0.73 |
| R3 / stream                                           | 10 | -  | 2.03  | 0.85 |
| R3 / stream                                           | 10 | 50 | 1.45  | 0.60 |
| R3 / stream                                           | -  | 75 | 1.84  | 0.77 |
| R4 / stream                                           | 10 | -  | 2.18  | 0.91 |
| R4 / stream                                           | 5  | 50 | 2.18  | 0.91 |
| R4 / stream                                           | -  | 75 | 1.31  | 0.55 |
| <b>FOCUS Step 4 (window ending at harvest - PHI)*</b> |    |    |       |      |
| D6 / ditch                                            | 10 | -  | 2.04  | 0.85 |
| D6 / ditch                                            | 5  | 50 | 2.36  | 0.98 |
| D6 / ditch                                            | -  | 75 | 1.91  | 0.80 |
| R1 / stream                                           | 10 | -  | 1.44  | 0.60 |
| R1 / stream                                           | 5  | 50 | 2.00  | 0.83 |
| R1 / stream                                           | -  | 75 | 1.31  | 0.55 |
| R2 / stream                                           | 10 | -  | 1.93  | 0.80 |
| R2 / stream                                           | 10 | 50 | 0.964 | 0.40 |
| R2 / stream                                           | -  | 75 | 1.75  | 0.73 |
| R3 / stream                                           | 10 | -  | 2.03  | 0.85 |
| R3 / stream                                           | 10 | 50 | 1.45  | 0.60 |
| R3 / stream                                           | -  | 75 | 1.84  | 0.77 |
| R4 / stream                                           | 10 | -  | 2.18  | 0.91 |
| R4 / stream                                           | 5  | 50 | 2.18  | 0.91 |
| R4 / stream                                           | -  | 75 | 1.31  | 0.55 |

\*[ Only scenarios where the trigger is not met at FOCUSsw step 3 should be included in step 4].

**FOCUS<sub>sw</sub> step 1 – PEC/RAC ratio for fludioxonil metabolites– Grapes at 500 g a.s./ha [2 applications]**

| Test organism                          | Metabolite | Tier 1-RAC (µg/L)      | Max PEC <sub>sw</sub> (µg/L) | PEC/RAC      |
|----------------------------------------|------------|------------------------|------------------------------|--------------|
| <i>Oncorhynchus mykiss</i>             | CGA192155  | >1 000                 | 121                          | < 0.12       |
|                                        | CGA339833  | >1 000                 | 73                           | < 0.07       |
|                                        | CGA265378  | 0.38 <sup>a</sup>      | < 0.001 <sup>b</sup>         | < 0.003      |
|                                        | SYN545245  | 0.38 <sup>a</sup>      | 0.002 <sup>b</sup>           | 0.01         |
|                                        | D9         | 0.38 <sup>a</sup>      | 4.55 <sup>b</sup>            | <b>11.97</b> |
|                                        | MF2        | 0.38 <sup>a</sup>      | 5.54 <sup>b</sup>            | <b>14.58</b> |
| <i>Daphnia magna</i>                   | CGA192155  | >1000                  | 121                          | < 0.12       |
|                                        | CGA265378  | 0.40                   | < 0.001 <sup>b</sup>         | < 0.003      |
|                                        | CGA339833  | >1000                  | 73                           | < 0.07       |
|                                        | SYN545245  | >1000                  | 101                          | < 0.10       |
| <i>Mysidopsis bahia</i>                | D9         | 0.27 <sup>a</sup>      | 4.55 <sup>b</sup>            | <b>16.85</b> |
|                                        | MF2        | 0.27 <sup>a</sup>      | 5.54 <sup>b</sup>            | <b>20.52</b> |
| <i>Chironomus dilutus</i>              | CGA192155  | 100 µg/kg <sup>a</sup> | 20.9 <sup>b</sup>            | 0.209        |
| <i>Chironomus riparius</i>             | CGA192155  | 400 µg/kg <sup>a</sup> | 121                          | 0.303        |
| <i>Pseudokirchneriella subcapitata</i> | CGA192155  | >10 000                | 121                          | < 0.01       |
|                                        | CGA339833  | >10 000                | 73                           | < 0.01       |
|                                        | SYN545245  | 4 400                  | 101                          | 0.02         |
|                                        | CGA265378  | 3.4 <sup>a</sup>       | < 0.001 <sup>b</sup>         | < 0.0003     |
|                                        | D9         | 3.4 <sup>a</sup>       | 4.55 <sup>b</sup>            | <b>1.34</b>  |
|                                        | MF2        | 3.4 <sup>a</sup>       | 5.54 <sup>b</sup>            | <b>1.63</b>  |

Values in **bold** are above the trigger value of 1 and hence further consideration is needed

<sup>a</sup> Toxicity of metabolites are assumed to be 10 times more toxic than fludioxonil

<sup>b</sup> FOCUS Step 2 PEC values

**A8240D: Orchards (Pome) at 225 g a.s./ha [1 applications]****FOCUS<sub>sw</sub> step 1-3 - PEC/RAC ratio for fludioxonil – Orchards (Pome) at 225 g a.s./ha [1 applications]**

| Scenario             | PEC <sub>sw</sub> global max (µg/L) | fish acute                  | fish chronic               | Aquatic invertebrates acute | Aquatic invertebrates prolonged | Algae                                                    | PEC <sub>sed</sub> (µg/kg) | Sed. dweller acute        | Sed. dweller prolonged     |
|----------------------|-------------------------------------|-----------------------------|----------------------------|-----------------------------|---------------------------------|----------------------------------------------------------|----------------------------|---------------------------|----------------------------|
|                      |                                     | Geometric mean<br>4 species | <i>Pimephales promelas</i> | Geometric mean<br>2 species | <i>Americamysis bahia</i>       | Geometric mean<br><i>Pseudokirchneriella subcapitata</i> |                            | <i>Chironomus dilutus</i> | <i>Chironomus riparius</i> |
|                      |                                     | LC <sub>50</sub>            | NOEC                       | EC <sub>50</sub>            | NOEC                            | EC <sub>50</sub>                                         |                            | LC <sub>50</sub>          | NOEC                       |
|                      |                                     | 630 µg/L                    | 18 µg/L                    | 402 µg/L                    | 24 µg/L                         | 430 µg/L                                                 |                            | 100000 µg/kg              | 40000 µg/kg                |
| <b>RAC</b>           |                                     | 6.3                         | 1.8                        | 4.02                        | 2.4                             | 34                                                       |                            | 1000                      | 4000                       |
| <b>FOCUS Step 1</b>  |                                     |                             |                            |                             |                                 |                                                          |                            |                           |                            |
|                      | 55.3                                | 0.88                        | <b>30.72</b>               | <b>13.76</b>                | <b>23.04</b>                    | <b>1.63</b>                                              | 1020                       | <b>1.02</b>               | 0.255                      |
| <b>FOCUS Step 2</b>  |                                     |                             |                            |                             |                                 |                                                          |                            |                           |                            |
| North Europe         | 11.8                                | 0.19                        | <b>6.56</b>                | <b>2.94</b>                 | <b>4.92</b>                     | 0.35                                                     | 146                        | 0.15                      | -                          |
| South Europe         | 11.8                                | 0.19                        | <b>6.56</b>                | <b>2.94</b>                 | <b>4.92</b>                     | 0.35                                                     | 131                        | 0.13                      | -                          |
| <b>FOCUS Step 3*</b> |                                     |                             |                            |                             |                                 |                                                          |                            |                           |                            |
| D3 / ditch           | 8.23                                | <b>1.31</b>                 | <b>4.57</b>                | <b>2.05</b>                 | <b>3.43</b>                     | -                                                        | -                          | -                         | -                          |
| D4 / pond            | 0.367                               | 0.06                        | 0.20                       | 0.09                        | 0.15                            | -                                                        | -                          | -                         | -                          |
| D4 / stream          | 7.94                                | <b>1.26</b>                 | <b>4.41</b>                | <b>1.98</b>                 | <b>3.31</b>                     | -                                                        | -                          | -                         | -                          |
| D5 / pond            | 0.367                               | 0.06                        | 0.20                       | 0.09                        | 0.15                            | -                                                        | -                          | -                         | -                          |
| D5 / stream          | 8.91                                | <b>1.41</b>                 | <b>4.95</b>                | <b>2.22</b>                 | <b>3.71</b>                     | -                                                        | -                          | -                         | -                          |
| R1 / pond            | 0.37                                | 0.06                        | 0.21                       | 0.09                        | 0.15                            | -                                                        | -                          | -                         | -                          |
| R1 / stream          | 6.31                                | <b>1.00</b>                 | <b>3.51</b>                | <b>1.57</b>                 | <b>2.63</b>                     | -                                                        | -                          | -                         | -                          |
| R2 / stream          | 8.46                                | <b>1.34</b>                 | <b>4.70</b>                | <b>2.10</b>                 | <b>3.53</b>                     | -                                                        | -                          | -                         | -                          |
| R3 / stream          | 8.9                                 | <b>1.41</b>                 | <b>4.94</b>                | <b>2.21</b>                 | <b>3.71</b>                     | -                                                        | -                          | -                         | -                          |
| R4 / stream          | 6.31                                | <b>1.00</b>                 | <b>3.51</b>                | <b>1.57</b>                 | <b>2.63</b>                     | -                                                        | -                          | -                         | -                          |

\*[Only scenarios where the trigger is not met at FOCUS<sub>sw</sub> step 1-2 should be included in step 3.]

**FOCUS<sub>sw</sub> step 4 - PEC/RAC ratio for fludioxonil – Orchards (Pome) at 225 g a.s./ha [1 application]**

**Organisms** *Fish, geomean acute*

**RAC:** 6.3 µg/L

| Mitigation options   | [x] m non-spray buffer zone<br>(corresponding to $\leq 95$ % drift reduction) | [x] % drift reduction from use of drift reducing<br>nozzles | PEC <sub>sw</sub><br>( $\mu\text{g/L}$ ) | PEC/RAC<br>ratio |
|----------------------|-------------------------------------------------------------------------------|-------------------------------------------------------------|------------------------------------------|------------------|
| <b>FOCUS Step 4*</b> |                                                                               |                                                             |                                          |                  |
| D3 / ditch           | 5                                                                             | -                                                           | 5.55                                     | 0.88             |
| D3 / ditch           | -                                                                             | 50                                                          | 3.89                                     | 0.62             |
| D4 / ditch           | 5                                                                             | -                                                           | 6.20                                     | 0.98             |
| D4 / ditch           | -                                                                             | 50                                                          | 3.76                                     | 0.60             |
| D5 / stream          | 10                                                                            | -                                                           | 3.1                                      | 0.49             |
| D5 / stream          | -                                                                             | 50                                                          | 4.21                                     | 0.67             |
| R2 / stream          | 10                                                                            | -                                                           | 2.95                                     | 0.47             |
| R2 / stream          | -                                                                             | 50                                                          | 4.00                                     | 0.63             |
| R3 / stream          | 10                                                                            | -                                                           | 6.95                                     | 0.49             |
| R3 / stream          | -                                                                             | 50                                                          | 4.21                                     | 0.67             |

**Organisms***Pimephales promelas, chronic*RAC: 1.8  $\mu\text{g/L}$ 

| Mitigation options   | [x] m non-spray buffer zone<br>(corresponding to $\leq 95$ % drift reduction) | [x] % drift reduction from use of drift reducing<br>nozzles | PEC <sub>sw</sub><br>( $\mu\text{g/L}$ ) | PEC/RAC<br>ratio |
|----------------------|-------------------------------------------------------------------------------|-------------------------------------------------------------|------------------------------------------|------------------|
| <b>FOCUS Step 4*</b> |                                                                               |                                                             |                                          |                  |
| D3 / ditch           | 15                                                                            | -                                                           | 1.25                                     | 0.69             |
| D3 / ditch           | 10                                                                            | 50                                                          | 1.24                                     | 0.69             |
| D3 / ditch           | 5                                                                             | 75                                                          | 1.39                                     | 0.77             |
| D3 / ditch           | -                                                                             | 90                                                          | 0.778                                    | 0.43             |
| D4 / ditch           | 15                                                                            | -                                                           | 1.40                                     | 0.78             |
| D4 / ditch           | 10                                                                            | 50                                                          | 1.38                                     | 0.77             |
| D4 / ditch           | 5                                                                             | 75                                                          | 1.55                                     | 0.86             |
| D4 / ditch           | -                                                                             | 90                                                          | 0.752                                    | 0.42             |
| D5 / stream          | 15                                                                            | -                                                           | 1.57                                     | 0.87             |
| D5 / stream          | 10                                                                            | 50                                                          | 1.55                                     | 0.86             |
| D5 / stream          | 5                                                                             | 75                                                          | 1.74                                     | 0.97             |
| D5 / stream          | -                                                                             | 90                                                          | 0.843                                    | 0.47             |
| R1 / stream          | 15                                                                            | -                                                           | 1.11                                     | 0.62             |
| R1 / stream          | 10                                                                            | 50                                                          | 1.10                                     | 0.61             |
| R1 / stream          | -                                                                             | 75                                                          | 1.49                                     | 0.83             |
| R2 / stream          | 15                                                                            | -                                                           | 1.49                                     | 0.83             |
| R2 / stream          | 10                                                                            | 50                                                          | 1.47                                     | 0.82             |
| R2 / stream          | 5                                                                             | 75                                                          | 1.65                                     | 0.92             |
| R2 / stream          | -                                                                             | 90                                                          | 0.801                                    | 0.45             |



|             |    |    |       |      |
|-------------|----|----|-------|------|
| R3 / stream | 15 | -  | 1.57  | 0.87 |
| R3 / stream | 10 | 50 | 1.55  | 0.86 |
| R3 / stream | 5  | 75 | 1.73  | 0.96 |
| R3 / stream | -  | 90 | 0.842 | 0.47 |
| R4 / stream | 15 | -  | 1.11  | 0.62 |
| R4 / stream | 10 | 50 | 1.10  | 0.61 |
| R4 / stream | -  | 75 | 1.49  | 0.83 |

**Organisms:***Aquatic invertebrate, geomean acute*

RAC: 4.02 µg/L

| Mitigation options   | [x] m non-spray buffer zone<br>(corresponding to ≤ 95 % drift reduction) | [x] % drift reduction from use of drift reducing<br>nozzles | PEC <sub>sw</sub><br>(µg/L) | PEC/RAC<br>ratio |
|----------------------|--------------------------------------------------------------------------|-------------------------------------------------------------|-----------------------------|------------------|
| <b>FOCUS Step 4*</b> |                                                                          |                                                             |                             |                  |
| D3 / ditch           | 10                                                                       | -                                                           | 2.48                        | 0.62             |
| D3 / ditch           | -                                                                        | 50                                                          | 3.89                        | 0.97             |
| D4 / ditch           | 10                                                                       | -                                                           | 2.77                        | 0.69             |
| D4 / ditch           | -                                                                        | 50                                                          | 3.76                        | 0.94             |
| D5 / stream          | 10                                                                       | -                                                           | 3.10                        | 0.77             |
| D5 / stream          | 5                                                                        | 50                                                          | 3.47                        | 0.86             |
| D5 / stream          | -                                                                        | 75                                                          | 2.11                        | 0.52             |
| R1 / stream          | 10                                                                       | -                                                           | 2.20                        | 0.55             |
| R1 / stream          | -                                                                        | 50                                                          | 2.99                        | 0.74             |
| R2 / stream          | 10                                                                       | -                                                           | 2.95                        | 0.73             |
| R2 / stream          | -                                                                        | 50                                                          | 4.00                        | 1.00             |
| R3 / stream          | 10                                                                       | -                                                           | 3.10                        | 0.77             |
| R3 / stream          | 5                                                                        | 50                                                          | 3.47                        | 0.86             |
| R3 / stream          | -                                                                        | 75                                                          | 2.11                        | 0.52             |
| R4 / stream          | 10                                                                       | -                                                           | 2.20                        | 0.55             |
| R4 / stream          | -                                                                        | 50                                                          | 2.99                        | 0.74             |

**Organisms:***Americamysis bahia, chronic*

RAC: 2.4 µg/L

| Mitigation options   | [x] m non-spray buffer zone<br>(corresponding to ≤ 95 % drift reduction) | [x] % drift reduction from use of drift reducing<br>nozzles | PEC <sub>sw</sub><br>(µg/L) | PEC/RAC<br>ratio |
|----------------------|--------------------------------------------------------------------------|-------------------------------------------------------------|-----------------------------|------------------|
| <b>FOCUS Step 4*</b> |                                                                          |                                                             |                             |                  |
| D3 / ditch           | 15                                                                       | -                                                           | 1.25                        | 0.52             |
| D3 / ditch           | 10                                                                       | 50                                                          | 1.24                        | 0.52             |
| D3 / ditch           | -                                                                        | 75                                                          | 1.95                        | 0.81             |

|             |    |    |      |      |
|-------------|----|----|------|------|
| D4 / ditch  | 15 | -  | 1.40 | 0.58 |
| D4 / ditch  | 10 | 50 | 1.38 | 0.58 |
| D4 / ditch  | -  | 75 | 1.88 | 0.78 |
| D5 / stream | 15 | -  | 1.57 | 0.65 |
| D5 / stream | 10 | 50 | 1.55 | 0.65 |
| D5 / stream | -  | 75 | 2.11 | 0.88 |
| R1 / stream | 10 | -  | 2.20 | 0.92 |
| R1 / stream | 10 | 50 | 1.10 | 0.46 |
| R1 / stream | -  | 75 | 1.49 | 0.62 |
| R2 / stream | 15 | -  | 1.49 | 0.62 |
| R2 / stream | 10 | 50 | 1.47 | 0.61 |
| R2 / stream | -  | 75 | 2.00 | 0.83 |
| R3 / stream | 15 | -  | 1.57 | 0.65 |
| R3 / stream | 10 | 50 | 1.55 | 0.65 |
| R3 / stream | -  | 75 | 2.11 | 0.88 |
| R4 / stream | 10 | -  | 2.20 | 0.92 |
| R4 / stream | 10 | 50 | 1.10 | 0.46 |
| R4 / stream | -  | 75 | 1.49 | 0.62 |

\*[ Only scenarios where the trigger is not met at FOCUS<sub>sw</sub> step 3 should be included in step 4].

### A8240D: Orchards (Pome) at 225 g a.s./ha [2 applications]

#### FOCUS<sub>sw</sub> step 1-3 - PEC/RAC ratio for fludioxonil – Orchards (Pome) at 225 g a.s./ha [2 applications]

| Scenario            | PEC <sub>sw</sub> global<br>max<br>(µg/L) | fish acute                  | fish chronic                   | Aquatic<br>invertebrates<br>acute | Aquatic<br>invertebrates<br>prolonged | Algae                                                        | PEC <sub>sed</sub><br>(µg/kg) | Sed. dweller<br>acute           | Sed. dweller<br>prolonged      |
|---------------------|-------------------------------------------|-----------------------------|--------------------------------|-----------------------------------|---------------------------------------|--------------------------------------------------------------|-------------------------------|---------------------------------|--------------------------------|
|                     |                                           | Geometric mean<br>4 species | <i>Pimephales<br/>promelas</i> | Geometric mean<br>2 species       | <i>Americamysis<br/>bahia</i>         | Geometric mean<br><i>Pseudokirchneriella<br/>subcapitata</i> |                               | <i>Chironomus<br/>dilatatus</i> | <i>Chironomus<br/>riparius</i> |
|                     |                                           | LC <sub>50</sub>            | NOEC                           | EC <sub>50</sub>                  | NOEC                                  | EC <sub>50</sub>                                             |                               | LC <sub>50</sub>                | NOEC                           |
|                     |                                           | 630 µg/L                    | 18 µg/L                        | 402 µg/L                          | 24 µg/L                               | 430 µg/L                                                     |                               | 100000 µg/kg                    | 40000 µg/kg                    |
| <b>RAC</b>          |                                           | 6.3                         | 1.8                            | 4.02                              | 2.4                                   | 34                                                           |                               | 1000                            | 4000                           |
| <b>FOCUS Step 1</b> |                                           |                             |                                |                                   |                                       |                                                              |                               |                                 |                                |
|                     | 14.55                                     | 0.23                        | <b>30.72</b>                   | <b>3.62</b>                       | <b>23.04</b>                          | <b>1.63</b>                                                  | 1020                          | <b>1.02</b>                     | 0.255                          |
| <b>FOCUS Step 2</b> |                                           |                             |                                |                                   |                                       |                                                              |                               |                                 |                                |

|              |      |      |             |             |             |      |     |       |   |
|--------------|------|------|-------------|-------------|-------------|------|-----|-------|---|
| North Europe | 11.7 | 0.19 | <b>6.50</b> | <b>2.91</b> | <b>4.88</b> | 0.34 | 258 | 0.258 | - |
| South Europe | 11.7 | 0.19 | <b>6.50</b> | <b>2.91</b> | <b>4.88</b> | 0.34 | 258 | 0.258 | - |

**FOCUS Step 3\***

|             |       |             |             |             |             |   |   |        |   |   |
|-------------|-------|-------------|-------------|-------------|-------------|---|---|--------|---|---|
| D3 / ditch  | 6.55  | <b>1.04</b> | <b>3.64</b> | <b>1.63</b> | <b>2.73</b> | - | - | 78.9** | - | - |
| D4 / pond   | 0.525 | 0.08        | 0.29        | 0.13        | 0.22        | - | - | -      | - | - |
| D4 / stream | 6.37  | <b>1.01</b> | <b>3.54</b> | <b>1.58</b> | <b>2.65</b> | - | - | -      | - | - |
| D5 / pond   | 0.557 | 0.09        | 0.31        | 0.14        | 0.23        | - | - | -      | - | - |
| D5 / stream | 7.13  | <b>1.13</b> | <b>3.96</b> | <b>1.77</b> | <b>2.97</b> | - | - | -      | - | - |
| R1 / pond   | 0.558 | 0.09        | 0.31        | 0.14        | 0.23        | - | - | -      | - | - |
| R1 / stream | 5.06  | 0.80        | <b>2.81</b> | <b>1.26</b> | <b>2.11</b> | - | - | -      | - | - |
| R2 / stream | 6.78  | <b>1.08</b> | <b>3.77</b> | <b>1.69</b> | <b>2.83</b> | - | - | -      | - | - |
| R3 / stream | 7.13  | <b>1.13</b> | <b>3.96</b> | <b>1.77</b> | <b>2.97</b> | - | - | -      | - | - |
| R4 / stream | 5.06  | 0.80        | <b>2.81</b> | <b>1.26</b> | <b>2.11</b> | - | - | -      | - | - |

\*[Only scenarios where the trigger is not met at FOCUS<sub>sw</sub> step 1-2 should be included in step 3.]

\*\* Sediment accumulation PEC (presented only for the worst case maximum PEC sediment).

**FOCUS<sub>sw</sub> step 4 - PEC/RAC ratio for fludioxonil – Orchards (Pome) at 225 g a.s./ha [2 applications]**

**Organisms** *Fish, geomean acute*

**RAC:** 6.3 µg/L

| Mitigation options   | [x] m non-spray buffer zone<br>(corresponding to ≤ 95 % drift reduction) | [x] % drift reduction from use of drift reducing<br>nozzles | PEC <sub>sw</sub><br>(µg/L) | PEC/RAC<br>ratio |
|----------------------|--------------------------------------------------------------------------|-------------------------------------------------------------|-----------------------------|------------------|
| <b>FOCUS Step 4*</b> |                                                                          |                                                             |                             |                  |
| D3 / ditch           | 5                                                                        | -                                                           | 4.55                        | 0.72             |
| D3 / ditch           | -                                                                        | 50                                                          | 3.11                        | 0.49             |
| D4 / ditch           | 5                                                                        | -                                                           | 5.06                        | 0.80             |
| D4 / ditch           | -                                                                        | 50                                                          | 3.01                        | 0.48             |
| D5 / stream          | 5                                                                        | -                                                           | 5.68                        | 0.90             |
| D5 / stream          | -                                                                        | 50                                                          | 3.38                        | 0.54             |
| R2 / stream          | 5                                                                        | -                                                           | 5.39                        | 0.86             |
| R2 / stream          | -                                                                        | 50                                                          | 3.21                        | 0.51             |
| R3 / stream          | 5                                                                        | -                                                           | 5.67                        | 0.90             |

|             |   |    |      |      |
|-------------|---|----|------|------|
| R3 / stream | - | 50 | 3.37 | 0.53 |
|-------------|---|----|------|------|

**Organisms***Pimephales promelas, chronic*

RAC: 1.8 µg/L

| Mitigation options   | [x] m non-spray buffer zone<br>(corresponding to ≤ 95 % drift reduction) | [x] % drift reduction from use of drift reducing<br>nozzles | PEC <sub>sw</sub><br>(µg/L) | PEC/RAC<br>ratio |
|----------------------|--------------------------------------------------------------------------|-------------------------------------------------------------|-----------------------------|------------------|
| <b>FOCUS Step 4*</b> |                                                                          |                                                             |                             |                  |
| D3 / ditch           | 15                                                                       | -                                                           | 1.07                        | 0.59             |
| D3 / ditch           | 10                                                                       | 50                                                          | 1.09                        | 0.61             |
| D3 / ditch           | -                                                                        | 75                                                          | 1.56                        | 0.87             |
| D4 / ditch           | 15                                                                       | -                                                           | 1.19                        | 0.66             |
| D4 / ditch           | 10                                                                       | 50                                                          | 1.21                        | 0.67             |
| D4 / ditch           | -                                                                        | 75                                                          | 1.51                        | 0.84             |
| D5 / stream          | 15                                                                       | -                                                           | 1.33                        | 0.74             |
| D5 / stream          | 10                                                                       | 50                                                          | 1.36                        | 0.76             |
| D5 / stream          | -                                                                        | 75                                                          | 1.69                        | 0.94             |
| R1 / stream          | 15                                                                       | -                                                           | 0.944                       | 0.52             |
| R1 / stream          | 10                                                                       | 50                                                          | 0.964                       | 0.54             |
| R1 / stream          | -                                                                        | 75                                                          | 1.20                        | 0.67             |
| R2 / stream          | 15                                                                       | -                                                           | 1.27                        | 0.71             |
| R2 / stream          | 10                                                                       | 50                                                          | 1.29                        | 0.72             |
| R2 / stream          | -                                                                        | 75                                                          | 1.35                        | 0.89             |
| R3 / stream          | 15                                                                       | -                                                           | 1.33                        | 0.74             |
| R3 / stream          | 10                                                                       | 50                                                          | 1.36                        | 0.76             |
| R3 / stream          | -                                                                        | 75                                                          | 1.69                        | 0.94             |
| R4 / stream          | 15                                                                       | -                                                           | 1.22                        | 0.68             |
| R4 / stream          | 10                                                                       | 50                                                          | 1.22                        | 0.68             |
| R4 / stream          | -                                                                        | 75                                                          | 1.20                        | 0.67             |

**Organisms:***Aquatic invertebrate, geomean acute*

RAC: 4.02 µg/L

| Mitigation options   | [x] m non-spray buffer zone<br>(corresponding to ≤ 95 % drift reduction) | [x] % drift reduction from use of drift reducing<br>nozzles | PEC <sub>sw</sub><br>(µg/L) | PEC/RAC<br>ratio |
|----------------------|--------------------------------------------------------------------------|-------------------------------------------------------------|-----------------------------|------------------|
| <b>FOCUS Step 4*</b> |                                                                          |                                                             |                             |                  |
| D3 / ditch           | 10                                                                       | -                                                           | 2.19                        | 0.54             |
| D3 / ditch           | -                                                                        | 50                                                          | 3.11                        | 0.77             |
| D4 / ditch           | 10                                                                       | -                                                           | 2.43                        | 0.60             |
| D4 / ditch           | -                                                                        | 50                                                          | 3.01                        | 0.75             |

|             |    |    |      |      |
|-------------|----|----|------|------|
| D5 / stream | 10 | -  | 2.72 | 0.68 |
| D5 / stream | -  | 50 | 3.38 | 0.84 |
| R1 / stream | 5  | -  | 4.02 | 1.00 |
| R1 / stream | -  | 50 | 2.39 | 0.59 |
| R2 / stream | 10 | -  | 5.39 | 0.64 |
| R2 / stream | -  | 50 | 3.21 | 0.80 |
| R3 / stream | 10 | -  | 2.72 | 0.68 |
| R3 / stream | -  | 50 | 3.37 | 0.84 |
| R4 / stream | 5  | -  | 4.02 | 1.00 |
| R4 / stream | -  | 50 | 2.39 | 0.59 |

**Organisms:***Americamysis bahia, chronic*

RAC: 2.4 µg/L

| Mitigation options   | [x] m non-spray buffer zone<br>(corresponding to ≤ 95 % drift reduction) | [x] % drift reduction from use of drift reducing<br>nozzles | PEC <sub>sw</sub><br>(µg/L) | PEC/RAC<br>ratio |
|----------------------|--------------------------------------------------------------------------|-------------------------------------------------------------|-----------------------------|------------------|
| <b>FOCUS Step 4*</b> |                                                                          |                                                             |                             |                  |
| D3 / ditch           | 10                                                                       | -                                                           | 2.19                        | 0.91             |
| D3 / ditch           | 5                                                                        | 50                                                          | 2.28                        | 0.95             |
| D3 / ditch           | -                                                                        | 75                                                          | 1.56                        | 0.65             |
| D4 / ditch           | 15                                                                       | -                                                           | 1.19                        | 0.50             |
| D4 / ditch           | 10                                                                       | 50                                                          | 1.21                        | 0.50             |
| D4 / ditch           | -                                                                        | 75                                                          | 1.51                        | 0.63             |
| D5 / stream          | 15                                                                       | -                                                           | 1.33                        | 0.55             |
| D5 / stream          | 10                                                                       | 50                                                          | 1.36                        | 0.57             |
| D5 / stream          | -                                                                        | 75                                                          | 1.69                        | 0.70             |
| R1 / stream          | 10                                                                       | -                                                           | 1.93                        | 0.80             |
| R1 / stream          | -                                                                        | 50                                                          | 2.39                        | 1.00             |
| R2 / stream          | 15                                                                       | -                                                           | 1.27                        | 0.53             |
| R2 / stream          | 10                                                                       | 50                                                          | 1.29                        | 0.54             |
| R2 / stream          | -                                                                        | 75                                                          | 1.60                        | 0.67             |
| R3 / stream          | 15                                                                       | -                                                           | 1.33                        | 0.55             |
| R3 / stream          | 10                                                                       | 50                                                          | 1.36                        | 0.57             |
| R3 / stream          | -                                                                        | 75                                                          | 1.69                        | 0.70             |
| R4 / stream          | 10                                                                       | -                                                           | 1.93                        | 0.80             |
| R4 / stream          | -                                                                        | 50                                                          | 2.39                        | 1.00             |

\* [Only scenarios where the trigger is not met at FOCUS<sub>sw</sub> step 3 should be included in step 4].

**FOCUS<sub>sw</sub> step 1-2 – PEC/RAC ratio for fludioxonil metabolites – Orchards (Pome) at 225 g a.s./ha [2 applications]**

| Test organism                          | Metabolite | Tier 1-RAC (µg/L)      | Max PEC <sub>sw</sub> (µg/L) | PEC/RAC     |
|----------------------------------------|------------|------------------------|------------------------------|-------------|
| <i>Oncorhynchus mykiss</i>             | CGA192155  | >1 000                 | 56.1                         | < 0.06      |
|                                        | CGA339833  | >1 000                 | 33.4                         | < 0.03      |
|                                        | SYN545245  | 0.38 <sup>a</sup>      | 0.001 <sup>b</sup>           | 0.003       |
|                                        | CGA265378  | 0.38 <sup>a</sup>      | < 0.001 <sup>b</sup>         | < 0.003     |
|                                        | D9         | 0.38 <sup>a</sup>      | 1.80 <sup>b</sup>            | <b>4.74</b> |
|                                        | MF2        | 0.38 <sup>a</sup>      | 2.19 <sup>b</sup>            | <b>5.76</b> |
| <i>Daphnia magna</i>                   | CGA192155  | >1000                  | 56.1                         | < 0.06      |
|                                        | CGA265378  | 0.40                   | < 0.001 <sup>b</sup>         | < 0.003     |
|                                        | CGA339833  | >1000                  | 33.4                         | < 0.03      |
|                                        | SYN545245  | >1000                  | 45.3                         | < 0.05      |
| <i>Mysidopsis bahia</i>                | D9         | 0.27 <sup>a</sup>      | 1.80 <sup>b</sup>            | <b>6.67</b> |
|                                        | MF2        | 0.27 <sup>a</sup>      | 2.19 <sup>b</sup>            | <b>8.11</b> |
| <i>Chironomus dilutus</i>              | CGA192155  | 100 µg/kg <sup>a</sup> | 56.1                         | 0.561       |
| <i>Chironomus riparius</i>             | CGA192155  | 400 µg/kg <sup>a</sup> | 56.1                         | 0.140       |
| <i>Pseudokirchneriella subcapitata</i> | CGA192155  | >10 000                | 56.1                         | < 0.01      |
|                                        | CGA339833  | >10 000                | 33.4                         | < 0.003     |
|                                        | SYN545245  | 4 400                  | 45.3                         | 0.01        |
|                                        | CGA265378  | 3.4 <sup>a</sup>       | < 0.001 <sup>b</sup>         | < 0.0003    |
|                                        | D9         | 3.4 <sup>a</sup>       | 1.80 <sup>b</sup>            | 0.53        |
|                                        | MF2        | 3.4 <sup>a</sup>       | 2.19 <sup>b</sup>            | 0.64        |

Values in **bold** are above the trigger value of 1 and hence further consideration is needed

<sup>a</sup> Toxicity of metabolites are assumed to be 10 times more toxic than fludioxonil

<sup>b</sup> FOCUS Step 2 PEC values

**A8240D: Strawberry at 250 g a.s./ha [Outdoor-1 application]****FOCUS<sub>sw</sub> step 1-3 - PEC/RAC ratio for fludioxonil – Strawberry at 250 g a.s./ha [1 application] \*\***

| Scenario             | PEC <sub>sw</sub> global max (µg/L) | fish acute                  | fish chronic               | Aquatic invertebrates acute | Aquatic invertebrates prolonged | Algae                                                    | PEC <sub>sed</sub> (µg/kg) | Sed. dweller acute        | Sed. dweller prolonged     |
|----------------------|-------------------------------------|-----------------------------|----------------------------|-----------------------------|---------------------------------|----------------------------------------------------------|----------------------------|---------------------------|----------------------------|
|                      |                                     | Geometric mean<br>4 species | <i>Pimephales promelas</i> | Geometric mean<br>2 species | <i>Americamysis bahia</i>       | Geometric mean<br><i>Pseudokirchneriella subcapitata</i> |                            | <i>Chironomus dilutus</i> | <i>Chironomus riparius</i> |
|                      |                                     | LC <sub>50</sub>            | NOEC                       | EC <sub>50</sub>            | NOEC                            | EC <sub>50</sub>                                         |                            | LC <sub>50</sub>          | NOEC                       |
|                      |                                     | 630 µg/L                    | 18 µg/L                    | 402 µg/L                    | 24 µg/L                         | 430 µg/L                                                 |                            | 100000 µg/kg              | 40000 µg/kg                |
| <b>RAC</b>           |                                     | 6.3                         | 1.8                        | 4.02                        | 2.4                             | 34                                                       |                            | 1000                      | 4000                       |
| <b>FOCUS Step 1</b>  |                                     |                             |                            |                             |                                 |                                                          |                            |                           |                            |
|                      | 39.9                                | 0.63                        | <b>22.17</b>               | <b>9.93</b>                 | <b>16.63</b>                    | 1.17                                                     | 1010                       | <b>1.010</b>              | 0.253                      |
| <b>FOCUS Step 2</b>  |                                     |                             |                            |                             |                                 |                                                          |                            |                           |                            |
| North Europe         | 3.28                                | -                           | <b>1.82</b>                | 0.82                        | <b>1.37</b>                     | 0.10 -                                                   | 86.4                       | 0.086                     | -                          |
| South Europe         | 2.76                                | -                           | <b>1.53</b>                | 0.69                        | <b>1.15</b>                     | 0.08 -                                                   | 71.9                       | 0.072                     | -                          |
| <b>FOCUS Step 3*</b> |                                     |                             |                            |                             |                                 |                                                          |                            |                           |                            |
| D6 / ditch           | 1.56                                | -                           | 0.87                       | -                           | -                               | -                                                        | -                          | -                         | -                          |
| R2 / stream          | 1.4                                 | -                           | 0.78                       | -                           | -                               | -                                                        | -                          | -                         | -                          |
| R3 / stream          | 1.47                                | -                           | 0.82                       | -                           | -                               | -                                                        | -                          | -                         | -                          |
| R4 / stream          | 1.04                                | -                           | 0.58                       | -                           | -                               | -                                                        | -                          | -                         | -                          |

\*[Only scenarios where the trigger is not met at FOCUS<sub>sw</sub> step 1-2 should be included in step 3.]

\*\* The outdoor use risk assessment covers the open type of protected structures.

### A8240D: Strawberry at 250 g a.s./ha [Outdoor-2 applications]

#### FOCUS<sub>sw</sub> step 1-3 - PEC/RAC ratio for fludioxonil – Strawberry at 250 g a.s./ha [2 applications] \*\*\*

| Scenario | PEC <sub>sw</sub> global max (µg/L) | fish acute                  | fish chronic               | Aquatic invertebrates acute | Aquatic invertebrates prolonged | Algae                                                    | PEC <sub>sed</sub> (µg/kg) | Sed. dweller acute        | Sed. dweller prolonged     |
|----------|-------------------------------------|-----------------------------|----------------------------|-----------------------------|---------------------------------|----------------------------------------------------------|----------------------------|---------------------------|----------------------------|
|          |                                     | Geometric mean<br>4 species | <i>Pimephales promelas</i> | Geometric mean<br>2 species | <i>Americamysis bahia</i>       | Geometric mean<br><i>Pseudokirchneriella subcapitata</i> |                            | <i>Chironomus dilutus</i> | <i>Chironomus riparius</i> |
|          |                                     | LC <sub>50</sub>            | NOEC                       | EC <sub>50</sub>            | NOEC                            | EC <sub>50</sub>                                         |                            | LC <sub>50</sub>          | NOEC                       |
|          |                                     | 630 µg/L                    | 18 µg/L                    | 402 µg/L                    | 24 µg/L                         | 430 µg/L                                                 |                            | 100000 µg/kg              | 40000 µg/kg                |

|                      |      |      |              |             |              |        |       |              |       |
|----------------------|------|------|--------------|-------------|--------------|--------|-------|--------------|-------|
| <b>RAC</b>           | 6.3  | 1.8  | 4.02         | 2.4         | 34           | 1000   | 4000  |              |       |
| <b>FOCUS Step 1</b>  | 39.9 | 0.63 | <b>22.17</b> | <b>9.93</b> | <b>16.63</b> | 1.17   | 1010  | <b>1.010</b> | 0.253 |
| <b>FOCUS Step 2</b>  |      |      |              |             |              |        |       |              |       |
| North Europe         | 6.32 | -    | <b>3.51</b>  | <b>1.57</b> | <b>2.63</b>  | 0.19 - | 167   | 0.167        | -     |
| South Europe         | 5.28 | -    | <b>2.93</b>  | <b>1.31</b> | <b>2.20</b>  | 0.16 - | 139   | 0.139        | -     |
| <b>FOCUS Step 3*</b> |      |      |              |             |              |        |       |              |       |
| D6 / ditch           | 1.37 | -    | 0.76         | 0.34        | 0.57         | -      | -     | -            | -     |
| R2 / stream          | 1.21 | -    | 0.67         | 0.30        | 0.50         | -      | 414** | 0.414        | 0.414 |
| R3 / stream          | 1.27 | -    | 0.71         | 0.32        | 0.53         | -      | -     | -            | -     |
| R4 / stream          | 1.49 | -    | 0.83         | 0.37        | 0.62         | -      | -     | -            | -     |

\*[Only scenarios where the trigger is not met at FOCUSsw step 1-2 should be included in step 3.]

\*\* Sediment accumulation PEC (presented only for the worst case maximum PEC sediment).

\*\*\* The outdoor use risk assessment covers the open type of protected structures.



**FOCUS<sub>sw</sub> step 1-2 – PEC/RAC ratio for fludioxonil metabolites – Strawberry at 250 g a.s./ha [Outdoor-2 applications]\***

| Test organism                          | Metabolite | Tier 1-RAC (µg/L)      | Max PEC <sub>sw</sub> (µg/L) | PEC/RAC     |
|----------------------------------------|------------|------------------------|------------------------------|-------------|
| <i>Oncorhynchus mykiss</i>             | CGA192155  | >1 000                 | 59.2                         | < 0.06      |
|                                        | CGA339833  | >1 000                 | 36.1                         | < 0.04      |
|                                        | SYN545245  | 0.38 <sup>a</sup>      | 0.001 <sup>b</sup>           | 0.003       |
|                                        | CGA265378  | 0.38 <sup>a</sup>      | < 0.001 <sup>b</sup>         | < 0.003     |
|                                        | D9         | 0.38 <sup>a</sup>      | 1.74 <sup>b</sup>            | <b>4.58</b> |
|                                        | MF2        | 0.38 <sup>a</sup>      | 2.09 <sup>b</sup>            | <b>5.50</b> |
| <i>Daphnia magna</i>                   | CGA192155  | >1000                  | 59.2                         | < 0.06      |
|                                        | CGA265378  | 0.40                   | < 0.001 <sup>b</sup>         | < 0.003     |
|                                        | CGA339833  | >1000                  | 36.1                         | < 0.04      |
|                                        | SYN545245  | >1000                  | 50.4                         | < 0.05      |
| <i>Mysidopsis bahia</i>                | D9         | 0.27 <sup>a</sup>      | 1.74 <sup>b</sup>            | <b>6.44</b> |
|                                        | MF2        | 0.27 <sup>a</sup>      | 2.09 <sup>b</sup>            | <b>7.74</b> |
| <i>Chironomus dilutus</i>              | CGA192155  | 100 µg/kg <sup>a</sup> | 59.2                         | 0.592       |
| <i>Chironomus riparius</i>             | CGA192155  | 400 µg/kg <sup>a</sup> | 59.2                         | 0.148       |
| <i>Pseudokirchneriella subcapitata</i> | CGA192155  | >10 000                | 59.2                         | < 0.01      |
|                                        | CGA339833  | >10 000                | 36.1                         | < 0.004     |
|                                        | SYN545245  | 4 400                  | < 0.001 <sup>b</sup>         | < 0.0003    |
|                                        | CGA265378  | 3.4 <sup>a</sup>       | 50.4                         | 0.01        |
|                                        | D9         | 3.4 <sup>a</sup>       | 1.74 <sup>b</sup>            | 0.51        |
|                                        | MF2        | 3.4 <sup>a</sup>       | 2.09 <sup>b</sup>            | 0.61        |

Values in **bold** are above the trigger value of 1 and hence further consideration is needed

\* The outdoor use risk assessment covers the open type of protected structures

<sup>a</sup> Toxicity of metabolites are assumed to be 10 times more toxic than fludioxonil

<sup>b</sup> FOCUS Step 2 PEC values

**Tier 1 risk assessment for fludioxonil based on NL glasshouse emissions strawberry (2 × 250 g a.s./ha)**

| Group                                    |                                 | Fish - acute             | Fish - chronic            | Invertebrate - acute | Invertebrate - chronic | Algae |      |
|------------------------------------------|---------------------------------|--------------------------|---------------------------|----------------------|------------------------|-------|------|
| Tier 1 RAC (µg/L)                        |                                 | 3.8                      | 1.8                       | 2.7                  | 2.4                    | 43    |      |
| Protected uses (NL Glasshouse emissions) |                                 | PEC <sub>sw</sub> (µg/L) | PEC/RAC (pelagic species) |                      |                        |       |      |
| Fludioxonil                              | Soil-less system with filter    | 16.4                     | 4.3                       | 9.1                  | 6.1                    | 6.8   | 0.38 |
|                                          | Soil-less system without filter | 5.20                     | 1.4                       | 2.9                  | 1.9                    | 2.2   | 0.12 |

**Tier 2 risk assessment for fludioxonil based on NL glasshouse emissions strawberry (2 × 250 g a.s./ha)**

| Group                                    |                                                                 | Fish - acute             | Fish - chronic            | Invertebrate - acute | Invertebrate - chronic | Algae |       |
|------------------------------------------|-----------------------------------------------------------------|--------------------------|---------------------------|----------------------|------------------------|-------|-------|
| Tier 1 RAC (µg/L)                        |                                                                 | 3.8                      | 1.8                       | 2.7                  | 2.4                    | 43    |       |
| Protected uses (NL Glasshouse emissions) |                                                                 | PEC <sub>sw</sub> (µg/L) | PEC/RAC (pelagic species) |                      |                        |       |       |
| Fludioxonil                              | Soil-less system with filter with 90% end of pipe mitigation    | 1.64                     | 0.43                      | 0.91                 | 0.61                   | 0.68  | 0.038 |
|                                          | Soil-less system without filter with 70% end of pipe mitigation | 1.56                     | 0.41                      | 0.87                 | 0.58                   | 0.65  | 0.036 |

**A8207M: Cereals at 225 g a.s./ha [2 applications]****FOCUS<sub>sw</sub> step 1 - PEC/RAC ratio for fludioxonil – Treated cereals seed at 12.5 g a.s./ha (worst-case scenario)**

| Scenario | PEC <sub>sw</sub> global max (µg/L) | fish acute               | fish chronic               | Aquatic invertebrates acute | Aquatic invertebrates prolonged | Algae                                                 | PEC <sub>sed</sub> (µg/kg) | Sed. dweller acute        | Sed. dweller prolonged     |
|----------|-------------------------------------|--------------------------|----------------------------|-----------------------------|---------------------------------|-------------------------------------------------------|----------------------------|---------------------------|----------------------------|
|          |                                     | Geometric mean 4 species | <i>Pimephales promelas</i> | Geometric mean 2 species    | <i>Americamysis bahia</i>       | Geometric mean <i>Pseudokirchneriella subcapitata</i> |                            | <i>Chironomus dilutus</i> | <i>Chironomus riparius</i> |
|          |                                     | LC <sub>50</sub>         | NOEC                       | EC <sub>50</sub>            | NOEC                            | EC <sub>50</sub>                                      |                            | LC <sub>50</sub>          | NOEC                       |

|                     | 630 µg/L | 18 µg/L | 402 µg/L | 24 µg/L | 340 µg/L | 100000 µg/kg | 40000 µg/kg |
|---------------------|----------|---------|----------|---------|----------|--------------|-------------|
| <b>RAC</b>          | 6.3      | 1.8     | 4.02     | 2.4     | 34       | 1000         | 4000        |
| <b>FOCUS Step 1</b> | 0.882    | 0.140   | 0.490    | 0.0219  | 0.368    | 0.026        | 78.3*       |
|                     |          |         |          |         |          | 0.           | 0.020       |

\* STEP 2 PEC sediment accumulation

**FOCUS<sub>sw</sub> step 1-2 – PEC/RAC ratio for metabolite CGA192155 –Treated cereals seed at 12.5 g a.s./ha (worst-case scenario)**

| Group                      | Tier 1 RAC (µg/L)       | FOCUS Step 1 PEC <sub>sw</sub> (µg/L) | PEC/RAC ratio |
|----------------------------|-------------------------|---------------------------------------|---------------|
| Fish – acute               | >1 000                  | 0.573                                 | <0.00057      |
| Invertebrate – acute       | >1 000                  |                                       | <0.00057      |
| Algae                      | >10 000                 |                                       | <0.000057     |
| Sediment dweller - acute   | 100 µg/kg <sup>a</sup>  | 0.107                                 | 0.00107       |
| Sediment dweller - chronic | 4 00 µg/kg <sup>a</sup> | µg/kg                                 | 0.00027       |

<sup>a</sup> The toxicity of CGA192155 to sediment dwelling organisms is assumed to be 10 times more toxic than fludioxonil.**FOCUS<sub>sw</sub> step 1-2 – PEC/RAC ratio for metabolite MF2 –Treated cereals seed at 12.5 g a.s./ha (worst-case scenario)**

| Group                    | Tier 1 RAC (µg/L)      | FOCUS Step 1 PEC <sub>sw</sub> (µg/L) | PEC/RAC ratio |
|--------------------------|------------------------|---------------------------------------|---------------|
| Fish – acute             | 0.63                   | 0.350                                 | <0.55         |
| Invertebrate – acute     | 0.4                    |                                       | <0.87         |
| Algae                    | 3.44                   |                                       | <0.1          |
| Sediment dweller - acute | 100 µg/kg <sup>a</sup> | <0.001                                | <0.00001      |

<sup>a</sup> The toxicity of MF2 to aquatic and sediment organisms is assumed to be 10 times more toxic than fludioxonil

**Effects on bees (Regulation (EU) N° 283/2013, Annex Part A, point 8.3.1 and Regulation (EU) N° 284/2013 Annex Part A, point 10.3.1)**

| Species               | Test substance      | Time scale/type of endpoint | End point                                 | toxicity                              |
|-----------------------|---------------------|-----------------------------|-------------------------------------------|---------------------------------------|
| <i>Apis mellifera</i> | Fludioxonil         | Acute                       | Oral toxicity (48 h LD <sub>50</sub> )    | > 100 µg a.s./bee                     |
| <i>Apis mellifera</i> | A8240B <sup>1</sup> | Acute                       | Oral toxicity (48 h LD <sub>50</sub> )    | > 101 µg prep./bee (>50 µg a.s./bee)  |
| <i>Apis mellifera</i> | Fludioxonil         | Acute                       | Contact toxicity (48 h LD <sub>50</sub> ) | > 100 µg a.s./bee                     |
| <i>Apis mellifera</i> | A8240B <sup>1</sup> | Acute                       | Contact toxicity (48 h LD <sub>50</sub> ) | > 100 µg prep./bee (>50 µg a.s./bee)  |
| <i>Apis mellifera</i> | A8207M              | Acute                       | Oral toxicity (48 h LD <sub>50</sub> )    | 572 µg prep./bee (13.78 µg a.s./bee)  |
| <i>Apis mellifera</i> | A8207M              | Acute                       | Contact toxicity (48 h LD <sub>50</sub> ) | > 1000 µg prep./bee (>24 µg a.s./bee) |
| <i>Apis mellifera</i> | A8240D              | Chronic, adult              | 10 d-NOED                                 | 44.06 µg/consumed a.s/bee/day         |
| <i>Apis mellifera</i> | A8240D              | Chronic, adult              | 10 d LDD <sub>50</sub>                    | > 166 µg a.s./consumed a.s/bee/day    |
| <i>Apis mellifera</i> | A8240D              | Chronic, larval             | 8 d-NOED                                  | 28.9 µg a.s./larva                    |
| <i>Apis mellifera</i> | A8207M              | Chronic, adult              | 10 d-LDD <sub>50</sub>                    | 7.08 µg/consumed a.s/bee/day          |
| <i>Apis mellifera</i> | A8207M              | Chronic, larval             | 8 d-NOED                                  | 8.26 µg a.s./larva                    |

<sup>1</sup> formulation variant equivalent to A8240D

Potential for accumulative toxicity: *Not studied.*

Semi-field test (Cage and tunnel test): *Not available.*

Field tests: *Not available.*

**A8240D: Risk assessment for grapes at 500 g a.s./ha [2 applications] (SANCO, 2002)**

| Species               | Test substance      | Risk quotient         | HQ/ETR | Trigger |
|-----------------------|---------------------|-----------------------|--------|---------|
| <i>Apis mellifera</i> | Fludioxonil         | HQ <sub>oral</sub>    | < 5.0  | 50      |
| <i>Apis mellifera</i> | A8240B <sup>1</sup> | HQ <sub>oral</sub>    | < 9.9  | 50      |
| <i>Apis mellifera</i> | Fludioxonil         | HQ <sub>contact</sub> | < 5.0  | 50      |
| <i>Apis mellifera</i> | A8240B <sup>1</sup> | HQ <sub>contact</sub> | < 10   | 50      |

<sup>1</sup> formulation variant equivalent to A8240D

**A8240D: Risk assessment for grapes at 500 g a.s./ha [2 applications] (EFSA, 2013)**

| Species                                    | Test substance               | Scenario                  | Risk quotient                   | HQ/ETR | Trigger |
|--------------------------------------------|------------------------------|---------------------------|---------------------------------|--------|---------|
| <b>Screening level assessment</b>          |                              |                           |                                 |        |         |
| <i>Apis mellifera</i>                      | Fludioxonil                  | Not relevant              | HQ <sub>contact</sub>           | 5.0    | 42      |
| <i>Apis mellifera</i>                      | Fludioxonil                  | Not relevant              | ETR <sub>acute adult oral</sub> | 0.05   | 0.2     |
| <i>Apis mellifera</i>                      | A8240D                       | Not relevant              | ETR <sub>chronic adult</sub>    | <0.032 | 0.03    |
| <i>Apis mellifera</i>                      | A8240D                       | Not relevant              | ETR <sub>larvae</sub>           | 0.11   | 0.2     |
| <b>1<sup>st</sup> tier oral assessment</b> |                              |                           |                                 |        |         |
| <i>Apis mellifera</i>                      | A8240D                       | Treated crop, BBCH 40-69  | ETR <sub>chronic adult</sub>    | 0.018  | 0.03    |
|                                            |                              | Treated crop BBCH ≥ 70    | ETR <sub>chronic adult</sub>    | 0.000  | 0.03    |
|                                            |                              | Weeds, BBCH 40-69         | ETR <sub>chronic adult</sub>    | 0.002  | 0.03    |
|                                            |                              | Weeds BBCH ≥ 70           | ETR <sub>chronic adult</sub>    | 0.002  | 0.03    |
|                                            |                              | Field margin, BBCH 40-69  | ETR <sub>chronic adult</sub>    | 0.000  | 0.03    |
|                                            |                              | Field margin BBCH ≥ 70    | ETR <sub>chronic adult</sub>    | 0.000  | 0.03    |
|                                            |                              | Adjacent crop, BBCH 40-69 | ETR <sub>chronic adult</sub>    | 0.000  | 0.03    |
|                                            |                              | Adjacent crop BBCH ≥ 70   | ETR <sub>chronic adult</sub>    | 0.000  | 0.03    |
|                                            |                              | Next crop, BBCH 40-69     | ETR <sub>chronic adult</sub>    | 0.001  | 0.03    |
| Next crop BBCH ≥ 70                        | ETR <sub>chronic adult</sub> | 0.001                     | 0.03                            |        |         |

**A8240D: Risk assessment for orchards (Pome) at 225 g a.s./ha [2 applications] (SANCO, 2002)**

| Species               | Test substance      | Risk quotient         | HQ/ETR | Trigger |
|-----------------------|---------------------|-----------------------|--------|---------|
| <i>Apis mellifera</i> | Fludioxonil         | HQ <sub>oral</sub>    | < 2.3  | 50      |
| <i>Apis mellifera</i> | A8240B <sup>1</sup> | HQ <sub>oral</sub>    | < 4.5  | 50      |
| <i>Apis mellifera</i> | Fludioxonil         | HQ <sub>contact</sub> | < 2.3  | 50      |
| <i>Apis mellifera</i> | A8240B <sup>1</sup> | HQ <sub>contact</sub> | < 4.5  | 50      |

<sup>1</sup> formulation variant equivalent to A8240D

**A8240D: Risk assessment for orchards (Pome) at 225 g a.s./ha [2 applications] (EFSA, 2013)**

| Species                           | Test substance | Scenario     | Risk quotient                   | HQ/ETR | Trigger |
|-----------------------------------|----------------|--------------|---------------------------------|--------|---------|
| <b>Screening level assessment</b> |                |              |                                 |        |         |
| <i>Apis mellifera</i>             | Fludioxonil    | Not relevant | HQ <sub>contact</sub>           | 2.3    | 42      |
| <i>Apis mellifera</i>             | Fludioxonil    | Not relevant | ETR <sub>acute adult oral</sub> | 0.02   | 0.2     |
| <i>Apis mellifera</i>             | A8240D         | Not relevant | ETR <sub>chronic adult</sub>    | <0.014 | 0.03    |
| <i>Apis mellifera</i>             | A8240D         | Not relevant | ETR <sub>larvae</sub>           | 0.05   | 0.2     |

**A8240D: Risk assessment for strawberry at 250 g a.s./ha [2 applications] (SANCO, 2002)**

| Species               | Test substance      | Risk quotient         | HQ/ETR | Trigger |
|-----------------------|---------------------|-----------------------|--------|---------|
| <i>Apis mellifera</i> | Fludioxonil         | HQ <sub>oral</sub>    | < 2.5  | 50      |
| <i>Apis mellifera</i> | A8240B <sup>1</sup> | HQ <sub>oral</sub>    | < 5    | 50      |
| <i>Apis mellifera</i> | Fludioxonil         | HQ <sub>contact</sub> | < 2.5  | 50      |
| <i>Apis mellifera</i> | A8240B <sup>1</sup> | HQ <sub>contact</sub> | < 5    | 50      |

<sup>1</sup> formulation variant equivalent to A8240D

**A8240D: Risk assessment for strawberry at 250 g a.s./ha [2 applications] (EFSA, 2013)**

| Species                           | Test substance | Scenario     | Risk quotient                   | HQ/ETR | Trigger |
|-----------------------------------|----------------|--------------|---------------------------------|--------|---------|
| <b>Screening level assessment</b> |                |              |                                 |        |         |
| <i>Apis mellifera</i>             | Fludioxonil    | Not relevant | HQ <sub>contact</sub>           | 2.5    | 42      |
| <i>Apis mellifera</i>             | Fludioxonil    | Not relevant | ETR <sub>acute adult oral</sub> | 0.02   | 0.2     |
| <i>Apis mellifera</i>             | A8240D         | Not relevant | ETR <sub>chronic adult</sub>    | <0.011 | 0.03    |
| <i>Apis mellifera</i>             | A8240D         | Not relevant | ETR <sub>larvae</sub>           | 0.04   | 0.2     |

**A8207M: Risk assessment for treated cereal seeds at 12.5 g a.s./ha (worst-case scenario) (SANCO, 2002)**

| Species               | Test substance | Risk quotient         | HQ/ETR  | Trigger |
|-----------------------|----------------|-----------------------|---------|---------|
| <i>Apis mellifera</i> | Fludioxonil    | HQ <sub>oral</sub>    | < 0.125 | 50      |
| <i>Apis mellifera</i> | A8207M         | HQ <sub>oral</sub>    | 0.90    | 50      |
| <i>Apis mellifera</i> | Fludioxonil    | HQ <sub>contact</sub> | < 0.125 | 50      |
| <i>Apis mellifera</i> | A8207M         | HQ <sub>contact</sub> | < 0.515 | 50      |

**A8207M: Risk assessment for treated cereal seeds at 12.5 g a.s./ha (worst-case scenario) (EFSA, 2013)**

| Species                           | Test substance           | Scenario     | Single application rate | Risk quotient                   | HQ/ETR | Trigger |
|-----------------------------------|--------------------------|--------------|-------------------------|---------------------------------|--------|---------|
| <b>Screening level assessment</b> |                          |              |                         |                                 |        |         |
| <i>Apis mellifera</i>             | Fludioxonil <sup>1</sup> | Not relevant | 12.5 g a.s./ha          | HQ <sub>contact</sub>           | <0.0   | 42      |
| <i>Apis mellifera</i>             | Fludioxonil <sup>1</sup> | Not relevant | 0.0125 kg/ha            | ETR <sub>acute adult oral</sub> | <0.00  | 0.2     |
|                                   |                          |              | 0.00275 mg/seed         |                                 | 0.00   |         |
| <i>Apis mellifera</i>             | A8207M                   | Not relevant | 0.0125 kg/ha            | ETR <sub>chronic adult</sub>    | 0.004  | 0.03    |
|                                   |                          |              | 0.00275 mg/seed         |                                 | 0.000  |         |
| <i>Apis mellifera</i>             | A8207M                   | Not relevant | 0.0125 kg/ha            | ETR <sub>larvae</sub>           | 0.00   | 0.2     |
|                                   |                          |              | 0.00275 mg/seed         |                                 | 0.00   |         |

<sup>1</sup> the endpoint obtained with the formulation have been used in the risk assessment as the formulation seems to be more acutely toxic than the active substance.

**Effects on other arthropod species (Regulation (EU) N° 283/2013, Annex Part A, point 8.3.2 and Regulation (EU) N° 284/2013 Annex Part A, point 10.3.2)**
**Extended laboratory tests, aged residue tests**

| Species                      | Life stage  | Test substance, substrate | Time scale | Dose (g/ha) <sup>1</sup>          | End point    | % effect <sup>2</sup>                 | ER <sub>50</sub>                       |
|------------------------------|-------------|---------------------------|------------|-----------------------------------|--------------|---------------------------------------|----------------------------------------|
| <i>Typhlodromus pyri</i>     | protonymphs | A8240D                    | 7-d        | 125<br>250<br>500<br>1000<br>2000 | Mortality    | 42<br>23<br>25<br>18<br>20            | > 2000 g prep./ha<br>(> 1000g a.s./ha) |
| <i>Typhlodromus pyri</i>     | protonymphs | A8240D                    | 7-d        | 125<br>250<br>500<br>1000<br>2000 | Reproduction | 4<br>12<br>29<br>3<br>40              | > 2000 g prep./ha<br>(> 1000g a.s./ha) |
| <i>Aphidius rhopalosiphi</i> | adult       | A8240D                    | 48 h       | 125<br>250<br>500<br>1000<br>2000 | Mortality    | 0<br>0<br>0<br>0<br>6.7               | > 2000 g prep./ha<br>(> 1000g a.s./ha) |
| <i>Aphidius rhopalosiphi</i> | adult       | A8240D                    | 48 h       | 125<br>250<br>500<br>1000<br>2000 | Reproduction | N/A<br>N/A<br>13.3<br>1.5<br>12.4     | > 2000 g prep./ha<br>(> 1000g a.s./ha) |
| <i>Chrysoperla carnea</i>    | larvae      | A8240D                    | 6 weeks    | 125<br>250<br>500<br>1000<br>2000 | Mortality    | 20<br>5.0<br>12.5<br>12.5<br>15.0     | > 2000 g prep./ha<br>(> 1000g a.s./ha) |
| <i>Chrysoperla carnea</i>    | larvae      | A8240D                    | 6 weeks    | 125<br>250<br>500<br>1000<br>2000 | Reproduction | N/A<br>N/A<br>3.1<br>2.8<br>2.7       | > 2000 g prep./ha<br>(> 1000g a.s./ha) |
| <i>Typhlodromus pyri</i>     | protonymphs | A8207M                    | 7-d        | 125<br>250<br>500<br>1000<br>2000 | Mortality    | 17<br>17<br>8<br>17<br>10             | > 2102 g prep./ha<br>(> 50 g a.s./ha)  |
| <i>Typhlodromus pyri</i>     | protonymphs | A8207M                    | 7-d        | 125<br>250<br>500<br>1000<br>2000 | Reproduction | 15.1<br>6.5<br>-18.1<br>-24.2<br>-6.5 | > 2102 g prep./ha<br>(> 50 g a.s./ha)  |



| Species                      | Life stage | Test substance, substrate | Time scale | Dose (g/ha) <sup>1</sup>                           | End point    | % effect <sup>2</sup>                      | ER <sub>50</sub>                                                                                         |
|------------------------------|------------|---------------------------|------------|----------------------------------------------------|--------------|--------------------------------------------|----------------------------------------------------------------------------------------------------------|
| <i>Aphidius rhopalosiphi</i> | adult      | A8207M                    | 48 h       | 125<br>250<br>500<br>1000<br>2000                  | Mortality    | 2.5<br>0.0<br>7.5<br>15<br>20              | > 2102 g prep./ha<br>(> 50 g a.s./ha)                                                                    |
| <i>Aphidius rhopalosiphi</i> | adult      | A8207M                    | 48 h       | 125<br>250<br>500<br>1000<br>2000                  | Reproduction | N/A<br>N/A<br>-8.2<br>-3.2<br>-13.9        | > 2102 g prep./ha<br>(> 50 g a.s./ha)                                                                    |
| <i>Aleochara bilineata</i>   | adult      | A8207M                    | 70-d       | (mg/kg soil)<br>5<br>10<br>20<br>37.5<br>75<br>150 | Mortality    | 2.5<br>2.5<br>3.8<br>2.5<br>1.3<br>3.8     | > 150 mg prep./kg soil<br>(3.615 mg a.s./kg soil)<br>NOEC = 5 mg prep./kg soil<br>(0.13 mg a.s./kg soil) |
| <i>Aleochara bilineata</i>   | adult      | A8207M                    | 70-d       | (mg/kg soil)<br>5<br>10<br>20<br>37.5<br>75<br>150 | Reproduction | 6.4<br>9.7<br>11.6<br>14.2<br>18.8<br>11.7 | > 150 mg prep./kg soil<br>(3.615 mg a.s./kg soil)<br>NOEC = 5 mg prep./kg soil<br>(0.13 mg a.s./kg soil) |

<sup>1</sup> dose is expressed in units of preparation

<sup>2</sup> positive percentages relate to adverse effects

N/A : Not applicable - no assessment of reproductive capacity was made.

#### A8240D: Risk assessment for grapes at 500 g a.s./ha [2 applications] based on extended lab test or aged residue tests

| Species                      | ER <sub>50</sub> (g a.s./ha) | In-field rate | Off-field rate <sup>1</sup> |
|------------------------------|------------------------------|---------------|-----------------------------|
| <i>Typhlodromus pyri</i>     | > 1000                       | 425           | 30.75                       |
| <i>Aphidius rhopalosiphi</i> | > 1000                       | 425           | 307.5                       |
| <i>Chrysoperla carnea</i>    | > 1000                       | 425           | 30.75                       |

<sup>1</sup> Off-field rate estimated with the drift rate at 3 m and considering 3D tests for *A. rhopalosiphi*-or 2D tests for *T. pyri* and *C. carnea*.

**A8240D: Risk assessment for orchards (Pome) at 225 g a.s./ha [2 applications] based on extended lab test or aged residue tests**

| Species                      | ER <sub>50</sub> (g a.s./ha) | In-field rate | Off-field rate <sup>1</sup> |
|------------------------------|------------------------------|---------------|-----------------------------|
| <i>Typhlodromus pyri</i>     | > 1000                       | 191.25        | 23.2                        |
| <i>Aphidius rhopalosiphi</i> | > 1000                       | 191.25        | 232                         |
| <i>Chrysoperla carnea</i>    | > 1000                       | 191.25        | 23.2                        |

<sup>1</sup> Off-field rate estimated with the drift rate at 3 m and considering 3D tests for *A. rhopalosiphi*-or 2D tests for *T. pyri* and *C. carnea*.

**A8240D: Risk assessment for strawberry at 250 g a.s./ha [2 applications] based on extended lab test or aged residue tests**

| Species                      | ER <sub>50</sub> (g a.s./ha) | In-field rate | Off-field rate <sup>1</sup> |
|------------------------------|------------------------------|---------------|-----------------------------|
| <i>Typhlodromus pyri</i>     | > 1000                       | 425           | 5.05                        |
| <i>Aphidius rhopalosiphi</i> | > 1000                       | 425           | 50.5                        |
| <i>Chrysoperla carnea</i>    | > 1000                       | 425           | 5.05                        |

<sup>1</sup> Off-field rate estimated with the drift rate at 1 m and considering 3D tests for *A. rhopalosiphi*-or 2D tests for *T. pyri* and *C. carnea*.

**A8207M: Risk assessment for treated cereal seeds at 12.5 g a.s./ha (worst-case scenario)**

| Test item   | Species                    | NOEC                                         | PEC <sub>in-field soil</sub>                | Acceptable effects |
|-------------|----------------------------|----------------------------------------------|---------------------------------------------|--------------------|
| A8207M      | <i>Aleochara bilineata</i> | 5.0<br>(mg product/kg dry soil)              | 0.701<br>(mg product/kg dry soil)           | Yes                |
| Fludioxonil | <i>Aleochara bilineata</i> | 0.1205<br>(mg a.s./kg dry soil) <sup>1</sup> | 0.040<br>(mg a.s./kg dry soil) <sup>2</sup> | Yes                |

<sup>1</sup> Data of the formulation expressed as fludioxonil.

<sup>2</sup> Peak accumulation PEC<sub>s</sub>

|                                  |
|----------------------------------|
| Semi-field tests                 |
| <i>No studies are available.</i> |
| Field studies                    |
| <i>No studies are available.</i> |
| Additional specific test         |
| <i>No studies are available.</i> |

**Effects on non-target soil meso- and macro fauna; effects on soil nitrogen transformation (Regulation (EU) N° 283/2013, Annex Part A, points 8.4, 8.5, and Regulation (EU) N° 284/2013 Annex Part A, points 10.4, 10.5)**

| Test organism             | Test substance                      | Application method of test a.s./ OM <sup>1</sup> | Time scale | End point    | Toxicity                                                                                                                                                          |
|---------------------------|-------------------------------------|--------------------------------------------------|------------|--------------|-------------------------------------------------------------------------------------------------------------------------------------------------------------------|
| Earthworms                |                                     |                                                  |            |              |                                                                                                                                                                   |
| <i>Eisenia foetida</i>    | Fludioxonil                         | Mixed with soil/ 10 % OM                         | Chronic    | Reproduction | EC <sub>10</sub> > 20 mg a.s./kg soil<br>EC <sub>20</sub> > 20 mg a.s./kg soil<br>NOEC = 20 mg a.s./kg soil<br>(NOEC <sub>corr</sub> = 10 mg a.s./kg soil)        |
| <i>Eisenia foetida</i>    | A8240D                              | Mixed with soil/ 5 % OM                          | Chronic    | Reproduction | EC <sub>10</sub> = 104 mg/kg soil<br>EC <sub>20</sub> = 132 mg/kg soil<br>NOEC = 100 mg prep./kg soil<br>(NOEC <sub>corr</sub> = 50 mg prep./kg soil)             |
| <i>Eisenia foetida</i>    | A8207M                              | Mixed with soil/ 10 % OM                         | Chronic    | Reproduction | NOEC = 2688 mg prep./kg soil<br>(NOEC <sub>corr</sub> = 1344 mg prep./kg soil)                                                                                    |
| <i>Eisenia foetida</i>    | CGA192155                           | Mixed with soil/ 10 % OM                         | Chronic    | Reproduction | EC <sub>10</sub> = 14.3 mg met./kg soil<br>EC <sub>20</sub> = 20.7 mg met./kg soil<br>NOEC = 26 mg met./kg soil                                                   |
| <i>Eisenia foetida</i>    | CGA265378                           | Mixed with soil/ 5 % OM                          | Chronic    | Reproduction | EC <sub>10</sub> = 104 mg met./kg soil<br>EC <sub>20</sub> = 130 mg met./kg soil<br>NOEC = 95.3 mg met./kg soil<br>(NOEC <sub>corr</sub> = 47.65 mg met./kg soil) |
| <i>Eisenia foetida</i>    | CGA339833                           | Mixed with soil/ 10 % OM                         | Chronic    | Reproduction | EC <sub>10</sub> = 28.5 mg met./kg soil<br>EC <sub>20</sub> = 57.9 mg met./kg soil<br>NOEC = 31.25 mg met./kg soil                                                |
| <i>Eisenia foetida</i>    | SYN545245                           | Mixed with soil/ 5 % OM                          | Chronic    | Reproduction | EC <sub>10</sub> = 60.6 mg met./kg soil<br>EC <sub>20</sub> = 90.6 mg met./kg soil<br>NOEC = 55.6 mg met./kg soil                                                 |
| <i>Eisenia foetida</i>    | MF2                                 | N/A                                              | Chronic    | Reproduction | NOEC = 1 mg met./kg soil <sup>2</sup>                                                                                                                             |
| <i>Eisenia foetida</i>    | D9                                  | N/A                                              | Chronic    | Reproduction | NOEC = 1 mg met./kg soil <sup>2</sup>                                                                                                                             |
| Other soil macroorganisms |                                     |                                                  |            |              |                                                                                                                                                                   |
| <i>Folsomia candida</i>   | Fludioxonil (represented by A8240D) | Mixed with soil/ 5 % OM                          | Chronic    | Reproduction | NOEC = 500 mg a.s./kg soil<br>(NOEC <sub>corr</sub> = 250 mg a.s./kg soil)                                                                                        |
| <i>Folsomia candida</i>   | MF2                                 | N/A                                              | Chronic    | Reproduction | NOEC = 25 mg met./kg soil <sup>2</sup>                                                                                                                            |
| <i>Folsomia candida</i>   | D9                                  | N/A                                              | Chronic    | Reproduction | NOEC = 25 mg met./kg soil <sup>2</sup>                                                                                                                            |

| Test organism              | Test substance                      | Application method of test a.s./ OM <sup>1</sup> | Time scale | End point    | Toxicity                                                                                                                                                                      |
|----------------------------|-------------------------------------|--------------------------------------------------|------------|--------------|-------------------------------------------------------------------------------------------------------------------------------------------------------------------------------|
| <i>Folsomia candida</i>    | A8240D                              | Mixed with soil/ 5 % OM                          | Chronic    | Reproduction | EC <sub>10</sub> > 1000 mg prep./kg soil<br>EC <sub>20</sub> > 1000 mg prep./kg soil<br>NOEC = 1000 mg prep./kg soil<br>(NOEC <sub>corr</sub> = <b>500 mg prep./kg soil</b> ) |
| <i>Folsomia candida</i>    | Fludioxonil (represented by A8207M) | Mixed with soil/ 10 % OM                         | Chronic    | Reproduction | EC <sub>10</sub> = 2.43 mg a.s./kg soil<br>(EC <sub>10 corr</sub> = <b>1.22 mg a.s./kg soil</b> )<br>NOEC = 12.5 mg a.s./kg soil                                              |
| <i>Folsomia candida</i>    | MF2                                 | N/A                                              | Chronic    | Reproduction | <b>NOEC = 0.122 mg met./kg soil<sup>3</sup></b>                                                                                                                               |
| <i>Folsomia candida</i>    | A8207M                              | Mixed with soil/ 10 % OM                         | Chronic    | Reproduction | NOEC = 525 mg prep./kg soil<br>EC <sub>10</sub> = 102.5 mg prep./kg soil<br>(EC <sub>10 corr</sub> = <b>51.25 mg prep./kg soil</b> )                                          |
| <i>Folsomia candida</i>    | CGA192155                           | Mixed with soil/ 5 % OM                          | Chronic    | Reproduction | <b>NOEC = 53 mg met./kg soil</b>                                                                                                                                              |
| <i>Folsomia candida</i>    | CGA265378                           | Mixed with soil/ 5 % OM                          | Chronic    | Reproduction | NOEC = 29 mg met./kg soil<br>(NOEC <sub>corr</sub> = <b>14.5 mg met./kg soil</b> )                                                                                            |
| <i>Folsomia candida</i>    | CGA339833                           | Mixed with soil/ 5 % OM                          | Chronic    | Reproduction | EC <sub>10</sub> > 1000 mg met./kg soil<br>EC <sub>20</sub> > 1000 mg met./kg soil<br><b>NOEC = 1000 mg met./kg soil</b>                                                      |
| <i>Folsomia candida</i>    | SYN545245                           | Mixed with soil/ 5 % OM                          | Chronic    | Reproduction | EC <sub>10</sub> > 100 mg met./kg soil<br>EC <sub>20</sub> > 100 mg met./kg soil<br><b>NOEC = 100 mg met./kg soil</b>                                                         |
| <i>Hypoaspis aculeifer</i> | Fludioxonil (represented by A8240D) | Mixed with soil/ 5 % OM                          | Chronic    | Reproduction | NOEC = 500 mg s.a./kg soil<br>(NOEC <sub>corr</sub> = <b>250 mg s.a./kg soil</b> )                                                                                            |
| <i>Hypoaspis aculeifer</i> | MF2                                 | N/A                                              | Chronic    | Reproduction | <b>NOEC = 25 mg met./kg soil<sup>2</sup></b>                                                                                                                                  |
| <i>Hypoaspis aculeifer</i> | D9                                  | N/A                                              | Chronic    | Reproduction | <b>NOEC = 25 mg met./kg soil<sup>2</sup></b>                                                                                                                                  |
| <i>Hypoaspis aculeifer</i> | A8240D                              | Mixed with soil/ 5 % OM                          | Chronic    | Reproduction | EC <sub>10</sub> > 1000 mg prep./kg soil<br>EC <sub>20</sub> > 1000 mg prep./kg soil<br><b>NOEC = 1000 mg prep./kg soil</b><br>(NOEC <sub>corr</sub> = 500 mg prep./kg soil)  |
| <i>Hypoaspis aculeifer</i> | Fludioxonil (represented by A8207M) | Mixed with soil/ 5 % OM                          | Chronic    | Reproduction | NOEC = 24.1 mg a.s./kg soil<br>(NOEC <sub>corr</sub> = <b>12.05 mg a.s./kg soil</b> )                                                                                         |
| <i>Hypoaspis aculeifer</i> | MF2                                 | N/A                                              | Chronic    | Reproduction | <b>NOEC = 1.205 mg met./kg soil<sup>3</sup></b>                                                                                                                               |

| Test organism              | Test substance | Application method of test a.s./ OM <sup>1</sup> | Time scale | End point    | Toxicity                                                                                                                                                                     |
|----------------------------|----------------|--------------------------------------------------|------------|--------------|------------------------------------------------------------------------------------------------------------------------------------------------------------------------------|
| <i>Hypoaspis aculeifer</i> | A8207M         | Mixed with soil/ 5 % OM                          | Chronic    | Reproduction | EC <sub>10</sub> > 1000 mg prep./kg soil<br>EC <sub>20</sub> > 1000 mg prep./kg soil<br><b>NOEC = 1000 mg prep./kg soil</b><br>(NOEC <sub>corr</sub> = 500 mg prep./kg soil) |
| <i>Hypoaspis aculeifer</i> | CGA192155      | Mixed with soil/ 5 % OM                          | Chronic    | Reproduction | EC <sub>10</sub> > 1000 mg met./kg soil<br>EC <sub>20</sub> > 1000 mg met./kg soil<br><b>NOEC = 1000 mg met./kg soil</b>                                                     |
| <i>Hypoaspis aculeifer</i> | CGA265378      | Mixed with soil/ 5 % OM                          | Chronic    | Reproduction | EC <sub>10</sub> > 1000 mg met./kg soil<br>EC <sub>20</sub> > 1000 mg met./kg soil<br><b>NOEC = 1000 mg met./kg soil</b>                                                     |
| <i>Hypoaspis aculeifer</i> | CGA339833      | Mixed with soil/ 5 % OM                          | Chronic    | Reproduction | <b>NOEC = 500 mg met./kg soil</b>                                                                                                                                            |
| <i>Hypoaspis aculeifer</i> | SYN545245      | Mixed with soil/ 5 % OM                          | Chronic    | Reproduction | EC <sub>10</sub> > 1000 mg met./kg soil<br>EC <sub>20</sub> > 1000 mg met./kg soil<br><b>NOEC = 1000 mg met./kg soil</b>                                                     |

Values in **bold** are used in the risk assessment

<sup>1</sup> To indicate whether the test substance was oversprayed/to indicate the organic content of the test soil (e.g. 5 % or 10 %).

<sup>2</sup> Toxicity endpoint is derived from the endpoint of the active substance (represented by A8240D) including a safety factor of 10.

<sup>3</sup> Toxicity endpoint is derived from the endpoint of the active substance (represented by A8207M) including a safety factor of 10.

N/A: Not applicable.

Higher tier testing (e.g. modelling or field studies)

*No data available.*

|                         |             |                         |                       |
|-------------------------|-------------|-------------------------|-----------------------|
| Nitrogen transformation | Fludioxonil | < 25 % effect at day 28 | 1.33 mg a.s./kg soil  |
| Nitrogen transformation | A8240D      | < 25 % effect at day 28 | 10 mg prep./kg soil   |
| Nitrogen transformation | A8207M      | < 25 % effect at day 28 | 7.01 mg prep./kg soil |
| Nitrogen transformation | CGA192155   | < 25 % effect at day 28 | 0.353 mg met./kg soil |
| Nitrogen transformation | CGA265378   | < 25 % effect at day 28 | 0.37 mg met./kg soil  |
| Nitrogen transformation | CGA339833   | < 25 % effect at day 28 | 20 mg met./kg soil    |
| Nitrogen transformation | SYN545245   | < 25 % effect at day 28 | 2.07 mg met./kg soil  |

### Toxicity/exposure ratios for soil organisms

#### A8240D: Risk assessment for grapes at 500 g a.s./ha [2 applications]

| Test organism         | Test substance | Time scale | Soil PEC           | TER | Trigger |
|-----------------------|----------------|------------|--------------------|-----|---------|
| <b>Earthworms</b>     |                |            |                    |     |         |
| <i>Eisenia fetida</i> | A8240D         | Chronic    | 0.533 <sup>1</sup> | 94  | 5       |
| <i>Eisenia fetida</i> | Fludioxonil    | Chronic    | 0.606 <sup>2</sup> | 17  | 5       |
| <i>Eisenia fetida</i> | CGA192155      | Chronic    | 0.068              | 210 | 5       |

| Test organism                    | Test substance | Time scale | Soil PEC           | TER   | Trigger |
|----------------------------------|----------------|------------|--------------------|-------|---------|
| <i>Eisenia fetida</i>            | CGA265378      | Chronic    | 0.030              | 1588  | 5       |
| <i>Eisenia fetida</i>            | CGA339833      | Chronic    | 0.046              | 620   | 5       |
| <i>Eisenia fetida</i>            | SYN545245      | Chronic    | 0.081              | 686   | 5       |
| <i>Eisenia fetida</i>            | MF2            | Chronic    | 0.036              | 28    | 5       |
| <i>Eisenia fetida</i>            | D9             | Chronic    | 0.030              | 33    | 5       |
| <b>Other soil macroorganisms</b> |                |            |                    |       |         |
| <i>Hypoaspis aculeifer</i>       | A8240D         | Chronic    | 0.533 <sup>1</sup> | 938   | 5       |
| <i>Hypoaspis aculeifer</i>       | Fludioxonil    | Chronic    | 0.606 <sup>2</sup> | 413   | 5       |
| <i>Hypoaspis aculeifer</i>       | CGA192155      | Chronic    | 0.068              | 14706 | 5       |
| <i>Hypoaspis aculeifer</i>       | CGA265378      | Chronic    | 0.030              | 16667 | 5       |
| <i>Hypoaspis aculeifer</i>       | CGA339833      | Chronic    | 0.046              | 10870 | 5       |
| <i>Hypoaspis aculeifer</i>       | SYN545245      | Chronic    | 0.081              | 12346 | 5       |
| <i>Hypoaspis aculeifer</i>       | MF2            | Chronic    | 0.036              | 694   | 5       |
| <i>Hypoaspis aculeifer</i>       | D9             | Chronic    | 0.030              | 833   | 5       |
| <i>Folsomia candida</i>          | A8240D         | Chronic    | 0.533 <sup>1</sup> | 938   | 5       |
| <i>Folsomia candida</i>          | Fludioxonil    | Chronic    | 0.606 <sup>2</sup> | 413   | 5       |
| <i>Folsomia candida</i>          | CGA192155      | Chronic    | 0.068              | 779   | 5       |
| <i>Folsomia candida</i>          | CGA265378      | Chronic    | 0.030              | 483   | 5       |
| <i>Folsomia candida</i>          | CGA339833      | Chronic    | 0.046              | 21739 | 5       |
| <i>Folsomia candida</i>          | SYN545245      | Chronic    | 0.081              | 1235  | 5       |
| <i>Folsomia candida</i>          | MF2            | Chronic    | 0.036              | 694   | 5       |
| <i>Folsomia candida</i>          | D9             | Chronic    | 0.030              | 833   | 5       |

<sup>1</sup> Initial PECs<sup>2</sup> Peak accumulation PECs**A8240D: Risk assessment for orchards (Pome) at 225 g a.s./ha [2 applications]**

| Test organism         | Test substance | Time scale | Soil PEC           | TER  | Trigger |
|-----------------------|----------------|------------|--------------------|------|---------|
| <b>Earthworms</b>     |                |            |                    |      |         |
| <i>Eisenia fetida</i> | A8240D         | Chronic    | 0.533 <sup>1</sup> | 94   | 5       |
| <i>Eisenia fetida</i> | Fludioxonil    | Chronic    | 0.300 <sup>2</sup> | 33   | 5       |
| <i>Eisenia fetida</i> | CGA192155      | Chronic    | 0.042              | 340  | 5       |
| <i>Eisenia fetida</i> | CGA265378      | Chronic    | 0.012              | 7942 | 5       |
| <i>Eisenia fetida</i> | CGA339833      | Chronic    | 0.031              | 919  | 5       |
| <i>Eisenia fetida</i> | SYN545245      | Chronic    | 0.032              | 1738 | 5       |
| <i>Eisenia fetida</i> | MF2            | Chronic    | 0.018              | 56   | 5       |
| <i>Eisenia fetida</i> | D9             | Chronic    | 0.014              | 71   |         |

| Test organism                    | Test substance | Time scale | Soil PEC           | TER   | Trigger |
|----------------------------------|----------------|------------|--------------------|-------|---------|
| <b>Other soil macroorganisms</b> |                |            |                    |       |         |
| <i>Hypoaspis aculeifer</i>       | A8240D         | Chronic    | 0.533 <sup>1</sup> | 938   | 5       |
| <i>Hypoaspis aculeifer</i>       | Fludioxonil    | Chronic    | 0.300 <sup>2</sup> | 833   | 5       |
| <i>Hypoaspis aculeifer</i>       | CGA192155      | Chronic    | 0.042              | 23810 | 5       |
| <i>Hypoaspis aculeifer</i>       | CGA265378      | Chronic    | 0.012              | 41667 | 5       |
| <i>Hypoaspis aculeifer</i>       | CGA339833      | Chronic    | 0.031              | 16129 | 5       |
| <i>Hypoaspis aculeifer</i>       | SYN545245      | Chronic    | 0.032              | 31250 | 5       |
| <i>Hypoaspis aculeifer</i>       | MF2            | Chronic    | 0.018              | 1389  | 5       |
| <i>Hypoaspis aculeifer</i>       | D9             | Chronic    | 0.014              | 1786  | 5       |
| <i>Folsomia candida</i>          | A8240D         | Chronic    | 0.533 <sup>1</sup> | 938   | 5       |
| <i>Folsomia candida</i>          | Fludioxonil    | Chronic    | 0.300 <sup>2</sup> | 833   | 5       |
| <i>Folsomia candida</i>          | CGA192155      | Chronic    | 0.042              | 1262  | 5       |
| <i>Folsomia candida</i>          | CGA265378      | Chronic    | 0.012              | 1208  | 5       |
| <i>Folsomia candida</i>          | CGA339833      | Chronic    | 0.031              | 32258 | 5       |
| <i>Folsomia candida</i>          | SYN545245      | Chronic    | 0.032              | 3125  | 5       |
| <i>Folsomia candida</i>          | MF2            | Chronic    | 0.018              | 1389  | 5       |
| <i>Folsomia candida</i>          | D9             | Chronic    | 0.014              | 1786  | 5       |

<sup>1</sup> Initial PECs<sup>2</sup> Peak accumulation PECs**A8240D: Risk assessment for strawberry at 250 g a.s./ha [2 applications]**

| Test organism                    | Test substance | Time scale | Soil PEC           | TER   | Trigger |
|----------------------------------|----------------|------------|--------------------|-------|---------|
| <b>Earthworms</b>                |                |            |                    |       |         |
| <i>Eisenia fetida</i>            | A8240D         | Chronic    | 0.533 <sup>1</sup> | 94    | 5       |
| <i>Eisenia fetida</i>            | Fludioxonil    | Chronic    | 0.381 <sup>2</sup> | 26    | 5       |
| <i>Eisenia fetida</i>            | CGA192155      | Chronic    | 0.051              | 280   | 5       |
| <i>Eisenia fetida</i>            | CGA265378      | Chronic    | 0.015              | 6353  | 5       |
| <i>Eisenia fetida</i>            | CGA339833      | Chronic    | 0.037              | 770   | 5       |
| <i>Eisenia fetida</i>            | SYN545245      | Chronic    | 0.040              | 1390  | 5       |
| <i>Eisenia fetida</i>            | MF2            | Chronic    | 0.022              | 45    | 5       |
| <i>Eisenia fetida</i>            | D9             | Chronic    | 0.018              | 56    | 5       |
| <b>Other soil macroorganisms</b> |                |            |                    |       |         |
| <i>Hypoaspis aculeifer</i>       | A8240D         | Chronic    | 0.533 <sup>1</sup> | 938   | 5       |
| <i>Hypoaspis aculeifer</i>       | Fludioxonil    | Chronic    | 0.381 <sup>2</sup> | 656   | 5       |
| <i>Hypoaspis aculeifer</i>       | CGA192155      | Chronic    | 0.051              | 19608 | 5       |
| <i>Hypoaspis aculeifer</i>       | CGA265378      | Chronic    | 0.015              | 33333 | 5       |
| <i>Hypoaspis aculeifer</i>       | CGA339833      | Chronic    | 0.037              | 13514 | 5       |

| Test organism              | Test substance | Time scale | Soil PEC           | TER   | Trigger |
|----------------------------|----------------|------------|--------------------|-------|---------|
| <i>Hypoaspis aculeifer</i> | SYN545245      | Chronic    | 0.040              | 25000 | 5       |
| <i>Hypoaspis aculeifer</i> | MF2            | Chronic    | 0.022              | 1136  | 5       |
| <i>Hypoaspis aculeifer</i> | D9             | Chronic    | 0.018              | 1389  | 5       |
| <i>Folsomia candida</i>    | A8240D         | Chronic    | 0.533 <sup>1</sup> | 938   | 5       |
| <i>Folsomia candida</i>    | Fludioxonil    | Chronic    | 0.381 <sup>2</sup> | 656   | 5       |
| <i>Folsomia candida</i>    | CGA192155      | Chronic    | 0.051              | 1039  | 5       |
| <i>Folsomia candida</i>    | CGA265378      | Chronic    | 0.015              | 967   | 5       |
| <i>Folsomia candida</i>    | CGA339833      | Chronic    | 0.037              | 27027 | 5       |
| <i>Folsomia candida</i>    | SYN545245      | Chronic    | 0.040              | 2500  | 5       |
| <i>Folsomia candida</i>    | MF2            | Chronic    | 0.022              | 1136  | 5       |
| <i>Folsomia candida</i>    | D9             | Chronic    | 0.018              | 1389  | 5       |

<sup>1</sup> Initial PECs

<sup>2</sup> Peak accumulation PECs



**A8207M: Risk assessment for treated cereal seeds at 12.5 g a.s./ha (worst-case scenario)**

| Test organism                    | Test substance | Time scale | Soil PEC           | TER  | Trigger |
|----------------------------------|----------------|------------|--------------------|------|---------|
| <b>Earthworms</b>                |                |            |                    |      |         |
| <i>Eisenia fetida</i>            | A8207M         | Chronic    | 0.701 <sup>1</sup> | 1917 | 5       |
| <i>Eisenia fetida</i>            | Fludioxonil    | Chronic    | 0.040 <sup>2</sup> | 250  | 5       |
| <i>Eisenia fetida</i>            | MF2            | Chronic    | 0.001              | 1000 | 5       |
| <b>Other soil macroorganisms</b> |                |            |                    |      |         |
| <i>Hypoaspis aculeifer</i>       | A8207M         | Chronic    | 0.701 <sup>1</sup> | 713  | 5       |
| <i>Hypoaspis aculeifer</i>       | Fludioxonil    | Chronic    | 0.040 <sup>2</sup> | 301  | 5       |
| <i>Hypoaspis aculeifer</i>       | MF2            | Chronic    | 0.001              | 1205 | 5       |
| <i>Folsomia candida</i>          | A8207M         | Chronic    | 0.701 <sup>1</sup> | 73   | 5       |
| <i>Folsomia candida</i>          | Fludioxonil    | Chronic    | 0.040 <sup>2</sup> | 30.5 | 5       |
| <i>Folsomia candida</i>          | MF2            | Chronic    | 0.001              | 122  | 5       |

<sup>1</sup> Initial PECs

<sup>2</sup> Peak accumulation PECs

**Effects on terrestrial non target higher plants (Regulation (EU) N° 283/2013, Annex Part A, point 8.6 and Regulation (EU) N° 284/2013 Annex Part A, point 10.6)**

Screening data

|                                                                                                     |
|-----------------------------------------------------------------------------------------------------|
| Not required for herbicides or plant growth regulators as ER <sub>50</sub> tests should be provided |
|-----------------------------------------------------------------------------------------------------|

Laboratory dose response tests

| Species                                                                                                                                                                                                                                    | Test substance | ER <sub>50</sub> (g/ha) vegetative vigour | ER <sub>50</sub> (g/ha) emergence | Exposure <sup>1</sup> (g/ha)                                                                                                                                                                   |
|--------------------------------------------------------------------------------------------------------------------------------------------------------------------------------------------------------------------------------------------|----------------|-------------------------------------------|-----------------------------------|------------------------------------------------------------------------------------------------------------------------------------------------------------------------------------------------|
| <i>Allium cepa</i> , <i>Avena sativa</i> , <i>Glycine max</i> , <i>Beta vulgaris</i> , <i>Brassica nap</i> a, <i>Cucumis sativa</i>                                                                                                        | A8240D         | > 1000 g prep./ha                         | > 1000 g prep./ha                 | -Grapes: 80.2 g prep./ha (3 m distance, late application (8.02%))<br>-Orchards: 70.8 g prep./ha (3 m distance, late application (15.73%))<br>-Strawberry: 13 g prep./ha (1m distance, (2.77%)) |
| <i>Glycine max</i> , <i>Lactuca sativa</i> , <i>Allium cepa</i> , <i>Avena sativa</i> , <i>Lolium perenne</i> , <i>Brassica oleracea</i> , <i>Zea mays</i> , <i>Cucumis sativa</i> , <i>Daucus carota</i> , <i>Lycopersicon esculentum</i> | Fludioxonil    | -                                         | > 1121 g a.s./ha                  | -Grapes: 40.1 g a.s./ha (3 m distance, late application (8.02%))<br>-Orchards: 35.4 g a.s./ha (3 m distance, late application (15.73%))<br>-Strawberry: 13 g a.s./ha (1m distance, (2.77%))    |
| <i>Glycine max</i> , <i>Lactuca sativa</i> , <i>Allium cepa</i> , <i>Avena sativa</i> , <i>Lolium perenne</i> , <i>Brassica</i>                                                                                                            | Fludioxonil    | > 1121 g a.s./ha                          | -                                 | -Strawberry: 13 g a.s./ha (1m distance, (2.77%))                                                                                                                                               |

| Species                                                                           | Test substance | ER <sub>50</sub> (g/ha) vegetative vigour | ER <sub>50</sub> (g/ha) emergence | Exposure <sup>1</sup> (g/ha) |
|-----------------------------------------------------------------------------------|----------------|-------------------------------------------|-----------------------------------|------------------------------|
| <i>oleracea, Zea mays, Cucumis sativa, Daucus carota, Lycopersicon esculentum</i> |                |                                           |                                   |                              |

<sup>1</sup> exposure has been estimated with Ganzelmeier drift data

### Effects on biological methods for sewage treatment (Regulation (EU) N° 283/2013, Annex Part A, point 8.8)

| Test type/organism | end point                         |
|--------------------|-----------------------------------|
| Activated sludge   | EC <sub>50</sub> > 100 mg a.s./L  |
| Activated sludge   | EC <sub>50</sub> > 1000 mg a.s./L |

### Monitoring data (Regulation (EU) N° 283/2013, Annex Part A, point 8.9 and Regulation (EU) N° 284/2013, Annex Part A, point 10.8)

Available monitoring data concerning adverse effect of the a.s. : *No data available.*  
 Available monitoring data concerning effect of the PPP: *No data available.*

### Definition of the residue for monitoring (Regulation (EU) N° 283/2013, Annex Part A, point 7.4.2) Ecotoxicologically relevant compounds<sup>1</sup>

| Compartment |             |
|-------------|-------------|
| soil        | Fludioxonil |
| water       | Fludioxonil |
| sediment    | Fludioxonil |
| groundwater | Fludioxonil |

<sup>1</sup> metabolites are considered relevant when, based on the risk assessment, they pose a risk comparable or higher than the parent

### Classification and labelling with regard to ecotoxicological data (Regulation (EU) N° 283/2013, Annex Part A, Section 10)

|                                                                                                                                                                                                 |                                                                                                                                                                  |
|-------------------------------------------------------------------------------------------------------------------------------------------------------------------------------------------------|------------------------------------------------------------------------------------------------------------------------------------------------------------------|
| Substance                                                                                                                                                                                       | Fludioxonil                                                                                                                                                      |
| Harmonised classification according to Regulation (EC) No 1272/2008 and its Adaptations to Technical Process [Table 3.1 of Annex VI of Regulation (EC) No 1272/2008 as amended] <sup>10</sup> : | -                                                                                                                                                                |
| According to the peer review criteria for harmonised classification according to Regulation (EC) No 1272/2008 may be met for:                                                                   | Aquatic acute 1, H400: Very toxic to aquatic life (Acute M = 1)<br>Aquatic chronic 1, H410: Very toxic to aquatic life with long lasting effects (Chronic M = 1) |

<sup>10</sup> Regulation (EC) No 1272/2008 of the European Parliament and of the Council of 16 December 2008 on classification, labelling and packaging of substances and mixtures, amending and repealing Directives 67/548/EEC and 1999/45/EC, and amending Regulation (EC) No 1907/2006. OJ L 353, 31.12.2008, 1-1355.
